# Supplementary material for: Photoredox-catalyzed sequential Dowd–Beckwith ring expansion and C–H functionalization of THIQs
Source: Royal Society of Chemistry journal article supplement (doi:10.1039/d2qo02001g), 2023-01-01

## Supporting Information

### Photoredox-catalyzed sequential Dowd–Beckwith ring expansion and C–H functionalization of THIQs

Hong Xin,<sup>a</sup> Li-Na Guo<sup>a</sup> Mingyu Yang,<sup>a</sup> Cheng Guan,<sup>a</sup> Zi-Hang Yuan,<sup>a</sup> and Xin-Hua Duan<sup>a,b\*</sup>

<sup>a</sup>*School of Chemistry, Xi'an Key Laboratory of Sustainable Energy Material Chemistry, Xi'an Jiaotong University, Xi'an 710049, China*

<sup>b</sup>*State Key Laboratory of Applied Organic Chemistry, Lanzhou University, Lanzhou 730000, P. R. China.*

Email: duanxh@xjtu.edu.cn

#### Table of Contents

|   |                                                                                                                              |     |
|---|------------------------------------------------------------------------------------------------------------------------------|-----|
| 1 | General information                                                                                                          | S2  |
| 2 | Starting materials                                                                                                           | S2  |
| 3 | Detailed optimization of reaction conditions                                                                                 | S3  |
| 4 | Representative procedure for the coupling of Dowd-Beckwith halides <b>1</b> with tetrahydroisoquinoline Derivatives <b>2</b> | S11 |
| 5 | Mechanistic investigation                                                                                                    | S15 |
| 6 | Characterization of products <b>3</b> and <b>4</b>                                                                           | S29 |
| 7 | References                                                                                                                   | S42 |
| 8 | <sup>1</sup> H NMR and <sup>13</sup> C NMR spectra of products <b>3</b> and <b>4</b>                                         | S43 |

## 1 General information

The reactions were conducted in oven-dried reaction tube. And the photoinduced reactions were carried out in oven-dried Schlenk-tube with Wattecs blue LEDs Irradiation Parallel Reactor. Unless otherwise stated, all reagents were purchased from commercial sources and used without further purification.  $^1\text{H}$  and  $^{13}\text{C}$  NMR spectra were recorded on a Bruker 400 MHz (100 MHz for  $^{13}\text{C}$  NMR) spectrometer at ambient temperature. Chemical shift are reported in ppm from TMS with the solvent resonance as internal standard ( $\text{CDCl}_3$ :  $^1\text{H}$  NMR:  $\delta = 7.26$ ;  $^{13}\text{C}$  NMR:  $\delta = 77.0$ ). Coupling constants are reported in Hz with multiplicities denoted as s (singlet), d (doublet), t (triplet), q (quartet), dd (doublet of doublets) and m (multiplet). Active hydrogen of products didn't show due to hydrogen deuterium exchange in  $\text{CDCl}_3$ . FT-IR spectra were recorded on a Bruker V 70 spectrometer and only major peaks are reported in  $\text{cm}^{-1}$ . HRMS were obtained on a WATERS I-Class VION IMS Q-Tof. Analytical TLC: aluminum backed plates pre-coated (0.25 mm) with Merck Silica Gel 60F-254. Compounds were visualized by exposure to UV-light or by dipping the plates in 2,4-dinitrophenylhydrazine stain followed by heating.

## 2 Starting materials

The Dowd-Beckwith halides **1** and tetrahydroisoquinoline derivatives **2** were prepared according to the literature.<sup>1, 2</sup> The NMR spectra of the known compounds were in full accordance with the data in the literatures.

### 3 Detailed optimization of reaction conditions

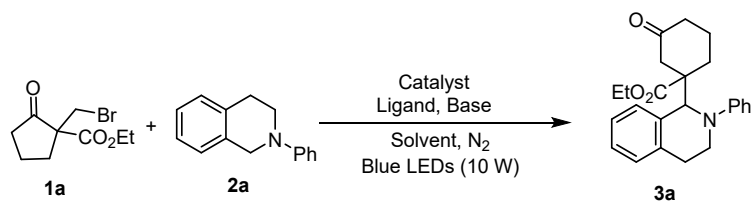

A 10 mL oven-dried reaction tube equipped with a magnetic stirrer was charged with *N*-phenyltetrahydroisoquinoline **2a** (0.20 mmol, 1.0 equiv.), catalyst, ligand and base under N<sub>2</sub> atmosphere (glovebox) (See Table S1). Subsequently, a solution of ethyl 1-(bromomethyl)-2-oxocyclopentane-1-carboxylate **1a** (0.30 mmol, 1.5 equiv.) in solvent (2.0 mL) was added by a syringe. The tube was capped with a pressure screw cap. The reaction mixture was stirred under the irradiation of a 10 W blue LED ( $\lambda = 460\text{--}470$  nm; distance app. 1.0 cm from the bulb) for a specified time. After that, the resulting mixture was quenched with H<sub>2</sub>O and extracted with EtOAc (3 x 10 mL). The combined organic phase was washed with brine (10 mL), dried over Na<sub>2</sub>SO<sub>4</sub>, and concentrated in vacuo. Purification of the crude product by flash chromatography on silica gel (petroleum ether/EtOAc: 8:1 to 5:1) furnishes the desired product **3a** as a light-yellow oil.

**Table S1. Optimization of the reaction of ethyl 1-(bromomethyl)-2-oxocyclopentane-1-carboxylate and *N*-phenyltetrahydroisoquinoline <sup>a</sup>**

**Catalysts**

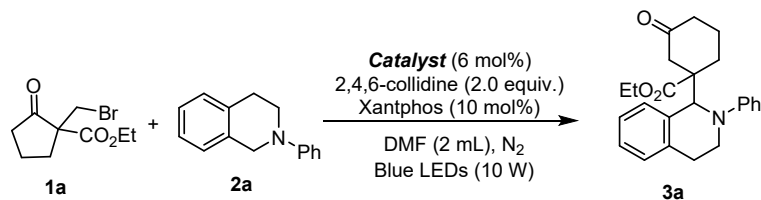

| Entry           | Catalyst (6 mol%)                                    | Yields (%) <sup>b</sup> |
|-----------------|------------------------------------------------------|-------------------------|
| 1               | Pd(PPh <sub>3</sub> ) <sub>4</sub>                   | 44                      |
| 2               | Pd <sub>2</sub> (dba) <sub>3</sub>                   | 30                      |
| 3               | Pd(PPh <sub>3</sub> ) <sub>2</sub> Cl <sub>2</sub>   | 17                      |
| 4               | Pd(CH <sub>3</sub> CN) <sub>2</sub> Cl <sub>2</sub>  | 9                       |
| 5               | Pd(PhCN) <sub>2</sub> Cl <sub>2</sub>                | 24                      |
| 6               | Pd(acac) <sub>2</sub>                                | 15                      |
| 7               | Pd(PPh <sub>3</sub> )(OAc) <sub>2</sub>              | 16                      |
| 8               | PdCl <sub>2</sub>                                    | 10                      |
| 9               | Pd(OAc) <sub>2</sub>                                 | 21                      |
| 10              | Pd(TFA) <sub>2</sub>                                 | 16                      |
| 11 <sup>d</sup> | Pd(PPh <sub>3</sub> ) <sub>4</sub>                   | 42                      |
| 12              | Cu(MeCN) <sub>4</sub> PF <sub>6</sub>                | n.r.                    |
| 13              | NiBr <sub>2</sub>                                    | trace                   |
| 14              | Fe(NO <sub>3</sub> ) <sub>2</sub> •9H <sub>2</sub> O | trace                   |

<sup>a</sup>Reaction conditions: **1a** (0.3 mmol, 1.5 equiv.), **2a** (0.2 mmol, 1.0 equiv.), 6 mol% of catalyst, 10 mol% of Xantphos, 2,4,6-collidine (0.4 mmol, 2.0 equiv.), DMF (2.0 mL), Blue LEDs (10 W), r.t., for 24 h, under N<sub>2</sub>. <sup>b</sup>Yields were determined by <sup>1</sup>H NMR using 1,3,5-trimethoxybenzene as an internal standard, d.r. = 1:1. <sup>c</sup>n.r. = no reaction.

<sup>d</sup>Without Xantphos.

## Solvent

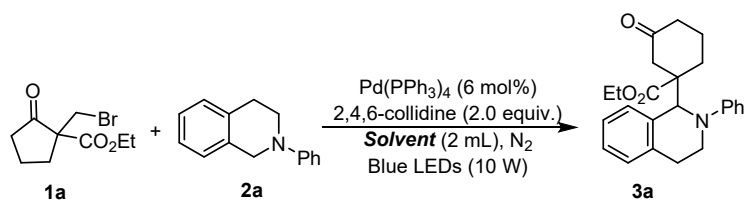

| Entry | Solvent                         | Yields (%) <sup>b</sup> |
|-------|---------------------------------|-------------------------|
| 1     | CH <sub>3</sub> CN              | 36                      |
| 2     | DMSO                            | 26                      |
| 3     | DMA                             | 33                      |
| 4     | DMF                             | 42                      |
| 5     | 1,4-dioxane                     | 18                      |
| 6     | THF                             | 24                      |
| 7     | MTBE                            | 15                      |
| 8     | acetone                         | 26                      |
| 9     | toluene                         | 17                      |
| 10    | PhCF <sub>3</sub>               | 21                      |
| 11    | EA                              | 15                      |
| 12    | NMP                             | 56 (53) <sup>c</sup>    |
| 13    | <i>n</i> -hexane                | 21                      |
| 14    | HMPA                            | 48                      |
| 15    | MeOH                            | trace                   |
| 16    | CH <sub>3</sub> NO <sub>2</sub> | trace                   |
| 17    | DCM                             | trace                   |

<sup>a</sup>Reaction conditions: **1a** (0.3 mmol, 1.5 equiv.), **2a** (0.2 mmol, 1.0 equiv.), 6 mol% of Pd(PPh<sub>3</sub>)<sub>4</sub>, 2,4,6-collidine (0.4 mmol, 2.0 equiv.), Solvent (2.0 mL), Blue LEDs (10 W), r.t., for 24 h, under N<sub>2</sub>. <sup>b</sup>Yields were determined by <sup>1</sup>H NMR using 1,3,5-trimethoxybenzene as an internal standard, d.r. =1:1. <sup>c</sup>Yields of isolated product.

**Base**

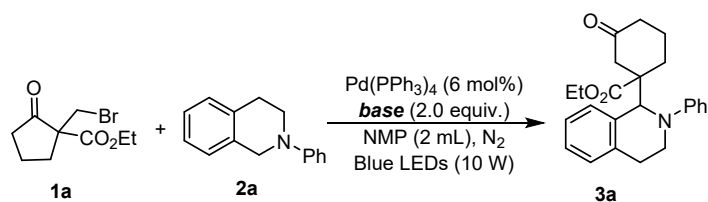

| Entry           | Base (2.0 equiv.)                  | Yields (%) <sup>b</sup> |
|-----------------|------------------------------------|-------------------------|
| 1               | Et <sub>3</sub> N                  | 14                      |
| 2               | DIPEA                              | 16                      |
| 3               | Pyridine                           | 14                      |
| 4               | 2,6-Lutidine                       | 45                      |
| 5               | DABCO                              | 20                      |
| 6               | DBU                                | trace                   |
| 7               | TMG                                | < 10                    |
| 8               | DMAP                               | 36                      |
| 9               | 2,4-Lutidine                       | 42                      |
| 10              | 4-pyrrolidinopyridine              | 23                      |
| 11              | 4-cyanopyridine                    | trace                   |
| 12              | 4-picoline                         | 54 (45) <sup>c</sup>    |
| 13 <sup>d</sup> | 2- picoline                        | 30                      |
| 14              | K <sup>t</sup> BuO                 | trace                   |
| 15              | 4-methoxypyridine                  | 38                      |
| 16              | K <sub>2</sub> CO <sub>3</sub>     | < 10                    |
| 17              | K <sub>3</sub> PO <sub>4</sub>     | < 10                    |
| 18              | Cs <sub>2</sub> CO <sub>3</sub>    | trace                   |
| 19              | Li <sub>2</sub> CO <sub>3</sub>    | 35                      |
| 20              | NaHCO <sub>3</sub>                 | 45                      |
| 21              | 2,4,6-collidine                    | 56 (53) <sup>c</sup>    |
| 22              | CF <sub>3</sub> CO <sub>2</sub> Na | 58 (55) <sup>c</sup>    |
| 23              | NaHPO <sub>4</sub>                 | 48                      |
| 24              | NaSO <sub>2</sub> CF <sub>3</sub>  | trace                   |
| 25              | NaOAc                              | trace                   |
| 26              | KOAc                               | < 10                    |

<sup>a</sup>Reaction conditions: **1a** (0.3 mmol, 1.5 equiv.), **2a** (0.2 mmol, 1.0 equiv.), 6 mol% of Pd(PPh<sub>3</sub>)<sub>4</sub>, base (0.4 mmol, 2.0 equiv.), NMP (2.0 mL), Blue LEDs (10 W), r.t., for 24 h, under N<sub>2</sub>. <sup>b</sup>Yields were determined by <sup>1</sup>H NMR using 1,3,5-trimethoxybenzene as an internal standard, d.r. =1:1. <sup>c</sup>Yields of isolated product.

### Ratio of catalyst

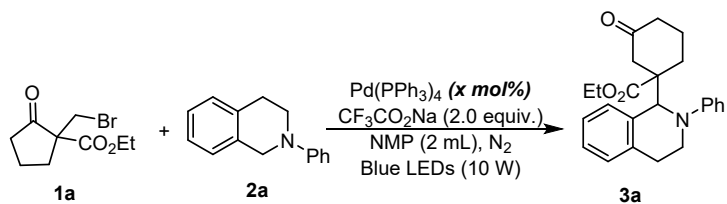

| Entry | $\text{Pd}(\text{PPh}_3)_4$ ( $x$ mol%) | Yields (%) <sup>b</sup> |
|-------|-----------------------------------------|-------------------------|
| 1     | 1                                       | 36                      |
| 2     | 2                                       | 66 (64) <sup>c</sup>    |
| 3     | 4                                       | 60                      |
| 4     | 6                                       | 58                      |
| 5     | 8                                       | 54                      |

<sup>a</sup>Reaction conditions: **1a** (0.3 mmol, 1.5 equiv.), **2a** (0.2 mmol, 1.0 equiv.),  $x$  mol% of  $\text{Pd}(\text{PPh}_3)_4$ ,  $\text{CF}_3\text{CO}_2\text{Na}$  (0.4 mmol, 2.0 equiv.), NMP (2.0 mL), Blue LEDs (10 W), r.t., for 24 h, under  $\text{N}_2$ . <sup>b</sup>Yields were determined by  $^1\text{H}$  NMR using 1,3,5-trimethoxybenzene as an internal standard, d.r. =1:1. <sup>c</sup>Yield of isolated product.

### Ratio of base

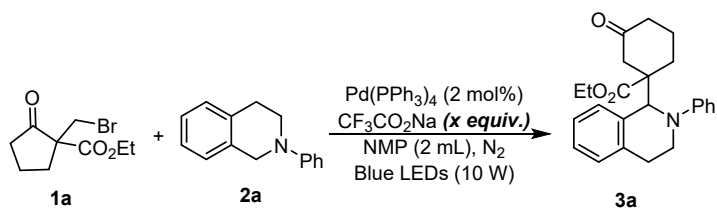

| Entry | $\text{CF}_3\text{CO}_2\text{Na}$ ( $x$ equiv.) | Yields (%) <sup>b</sup> |
|-------|-------------------------------------------------|-------------------------|
| 1     | 3.5                                             | 48                      |
| 2     | 3                                               | 67                      |
| 3     | 2.5                                             | 72 (69) <sup>c</sup>    |
| 4     | 2                                               | 66 (64) <sup>c</sup>    |
| 5     | 1.5                                             | 57                      |
| 6     | 1                                               | 36                      |
| 7     | 0.5                                             | 18                      |
| 8     | 0.2                                             | 24                      |

<sup>a</sup>Reaction conditions: **1a** (0.3 mmol, 1.5 equiv.), **2a** (0.2 mmol, 1.0 equiv.), 2 mol% of  $\text{Pd}(\text{PPh}_3)_4$ ,  $\text{CF}_3\text{CO}_2\text{Na}$  ( $x$  equiv.), NMP (2.0 mL), Blue LEDs (10 W), r.t., for 24 h, under  $\text{N}_2$ . <sup>b</sup>Yields were determined by  $^1\text{H}$  NMR using 1,3,5-trimethoxybenzene as an internal standard, d.r. =1:1. <sup>c</sup>Yield of isolated product.

### Ratio of 1a:2a

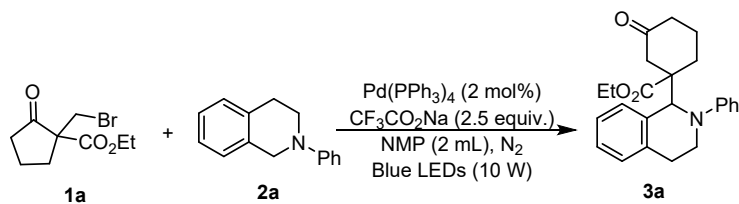

| Entry | 1a:2a | Yields (%) <sup>b</sup> |
|-------|-------|-------------------------|
| 1     | 1:1   | 48                      |
| 2     | 1.5:1 | 72 (69) <sup>c</sup>    |
| 3     | 2:1   | 48                      |
| 4     | 1:2   | 48                      |

<sup>a</sup>Reaction conditions: **1a** : **2a** = x, 2 mol% of Pd(PPh<sub>3</sub>)<sub>4</sub>, CF<sub>3</sub>CO<sub>2</sub>Na (2.5 equiv.), NMP (2.0 mL), Blue LEDs (10 W), r.t., for 24 h, under N<sub>2</sub>. <sup>b</sup>Yield were determined by <sup>1</sup>H NMR using 1,3,5-trimethoxybenzene as an internal standard, d.r. =1:1. <sup>c</sup>Yield of isolated product.

### Controlled experiments

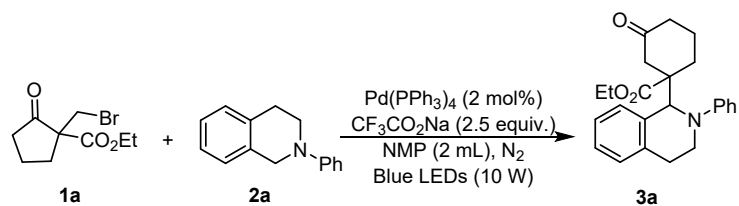

| Entry | Conditions                                 | Yields (%) <sup>b</sup> |
|-------|--------------------------------------------|-------------------------|
| 1     | -                                          | 72                      |
| 2     | Without Pd(PPh <sub>3</sub> ) <sub>4</sub> | n.r.                    |
| 3     | Without CF <sub>3</sub> CO <sub>2</sub> Na | trace                   |
| 4     | In the dark                                | n.r.                    |
| 5     | O <sub>2</sub>                             | 0                       |
| 6     | PPh <sub>3</sub> (5 mol%)                  | 62                      |
| 7     | Xantphos (5 mol%)                          | 60                      |

<sup>a</sup>Reaction conditions: **1a** (0.3 mmol, 1.5 equiv.), **2a** (0.2 mmol, 1.0 equiv.), 2 mol% of Pd(PPh<sub>3</sub>)<sub>4</sub>, CF<sub>3</sub>CO<sub>2</sub>Na (2.5 equiv.), NMP (2.0 mL), Blue LEDs (10 W), r.t., for 24 h, under N<sub>2</sub>. <sup>b</sup>Yields were determined by <sup>1</sup>H NMR using 1,3,5-trimethoxybenzene as an internal standard, d.r. =1:1.



### Photocatalyst (PC)

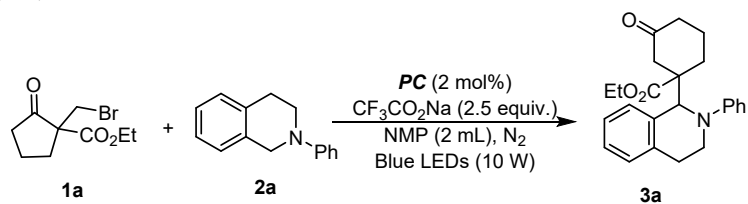

| Entry | PC                                                               | Yields (%) <sup>b</sup> |
|-------|------------------------------------------------------------------|-------------------------|
| 1     | <i>fac</i> -Ir(ppy) <sub>3</sub>                                 | 60                      |
| 2     | Ir(dF(CF <sub>3</sub> )ppy) <sub>2</sub> (dtbbpy)PF <sub>6</sub> | 48                      |
| 3     | Ru(bpy) <sub>3</sub> Cl <sub>2</sub>                             | trace                   |
| 4     | Eosin Y                                                          | 54                      |
| 5     | 4CzIPN                                                           | 48                      |
| 6     | Erythrosin B                                                     | 42                      |
| 7     | Acid Red 94                                                      | 48                      |
| 8     | Rhodamine B                                                      | 42                      |
| 9     | Methylene Blue                                                   | 36                      |
| 10    | Triphenylpyrylium                                                | 48                      |

<sup>a</sup> Reaction conditions: **1a** (0.3 mmol, 1.5 equiv.), **2a** (0.2 mmol, 1.0 equiv.), 2 mol% of PC, CF<sub>3</sub>CO<sub>2</sub>Na (2.5 equiv.), NMP (2.0 mL), Blue LEDs (10 W), r.t., for 24 h, under N<sub>2</sub>. <sup>b</sup>Yields were determined by <sup>1</sup>H NMR using 1,3,5-trimethoxybenzene as an internal standard, d.r. =1:1.

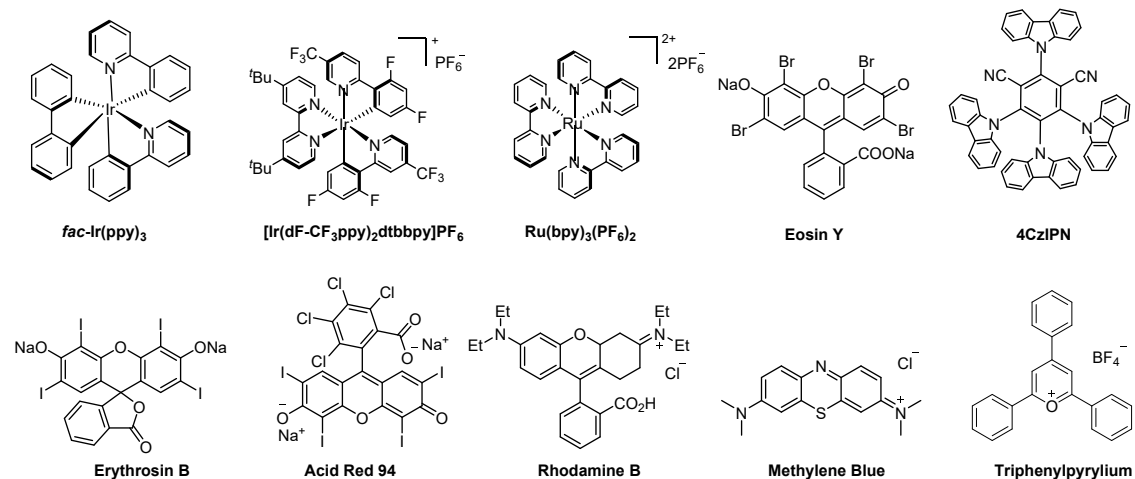

**Others**

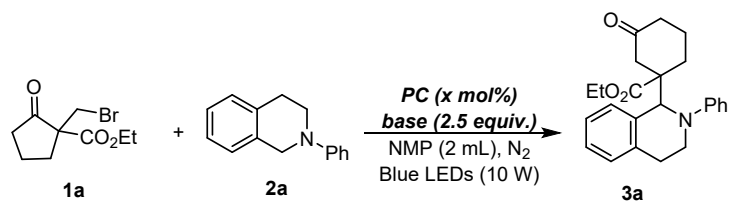

| Entry | PC (x mol%)                            | Base                               | Yields (%) <sup>b</sup> |
|-------|----------------------------------------|------------------------------------|-------------------------|
| 1     | Eosin Y (1)                            | CF <sub>3</sub> CO <sub>2</sub> Na | 18                      |
| 2     | <i>fac</i> -Ir(ppy) <sub>3</sub> (1)   | CF <sub>3</sub> CO <sub>2</sub> Na | 78                      |
| 3     | <i>fac</i> -Ir(ppy) <sub>3</sub> (0.5) | CF <sub>3</sub> CO <sub>2</sub> Na | 68                      |
| 4     | <i>fac</i> -Ir(ppy) <sub>3</sub> (2)   | CF <sub>3</sub> CO <sub>2</sub> Na | 60                      |
| 5     | <i>fac</i> -Ir(ppy) <sub>3</sub> (1)   | NaHCO <sub>3</sub>                 | 54                      |
| 6     | <i>fac</i> -Ir(ppy) <sub>3</sub> (1)   | K <sub>2</sub> CO <sub>3</sub>     | 50                      |
| 7     | <i>fac</i> -Ir(ppy) <sub>3</sub> (1)   | NaOAc                              | 53                      |
| 8     | <i>fac</i> -Ir(ppy) <sub>3</sub> (1)   | 2,4,6-collidine                    | 38                      |
| 9     | <i>fac</i> -Ir(ppy) <sub>3</sub> (1)   | Et <sub>3</sub> N                  | 60                      |
| 10    | <i>fac</i> -Ir(ppy) <sub>3</sub> (1)   | DABCO                              | trace                   |
| 11    | <i>fac</i> -Ir(ppy) <sub>3</sub> (1)   | DIPEA                              | 42                      |
| 12    | <i>fac</i> -Ir(ppy) <sub>3</sub> (1)   | -                                  | 24                      |

<sup>a</sup>Reaction conditions: **1a** (0.3 mmol, 1.5 equiv.), **2a** (0.2 mmol, 1.0 equiv.), x mol% of PC, base (2.5 equiv.), NMP (2.0 mL), Blue LEDs (10 W), r.t., for 24 h, under N<sub>2</sub>, d.r. =1:1. <sup>b</sup>Yield of isolated product.

## 4 Representative procedure for the coupling of Dowd-Beckwith halides **1** with tetrahydroisoquinoline Derivatives **2**

### (1) Palladium-catalyzed procedure

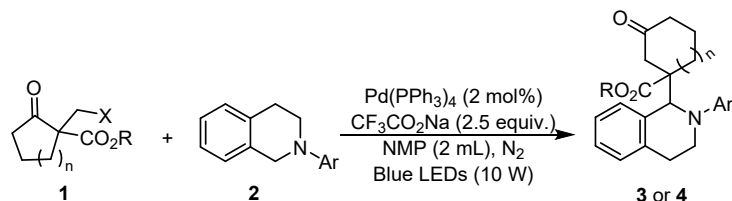

A 10 mL oven-dried reaction tube equipped with a magnetic stirrer was charged with tetrahydroisoquinoline derivatives **2** (0.20 mmol, 1.0 equiv.), Pd(PPh<sub>3</sub>)<sub>4</sub> (4.6 mg, 2 mol%), CF<sub>3</sub>CO<sub>2</sub>Na (0.50 mmol, 2.5 equiv.) under N<sub>2</sub> atmosphere (glovebox). Subsequently, a solution of Dowd-Beckwith halides **1** (0.30 mmol, 1.5 equiv.) in NMP (2.0 mL) was added by a syringe. The tube was capped with a pressure screw cap. The reaction mixture was stirred under the irradiation of a 10 W blue LED ( $\lambda = 460\text{--}470$  nm; distance app. 1.0 cm from the bulb) for a specified time. After that, the resulting mixture was quenched with H<sub>2</sub>O and extracted with EtOAc (3 x 10 mL). The combined organic phase was washed with brine (10 mL), dried over Na<sub>2</sub>SO<sub>4</sub>, and concentrated in vacuo. Purification of the crude product by flash chromatography on silica gel (petroleum ether/EtOAc: 8:1 to 5:1) furnishes the desired products **3** and **4** in yields listed in Scheme 3 and Scheme 4.

### (2) Iridium-catalyzed procedure

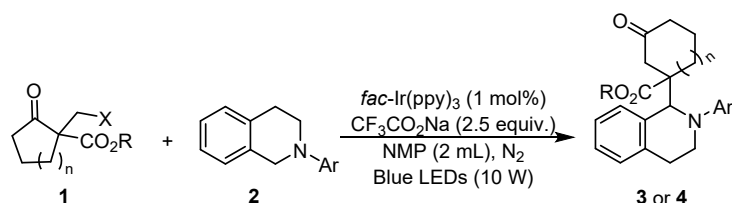

A 10 mL oven-dried reaction tube equipped with a magnetic stirrer was charged with tetrahydroisoquinoline derivatives **2** (0.20 mmol, 1.0 equiv.), *fac*-Ir(ppy)<sub>3</sub> (1.3 mg, 1 mol%) and CF<sub>3</sub>CO<sub>2</sub>Na (0.50 mmol, 2.5 equiv.) under N<sub>2</sub> atmosphere (glovebox). Subsequently, a solution of Dowd-Beckwith halides **1** (0.30 mmol, 1.5 equiv.) in NMP (2.0 mL) was added by a syringe. The tube was capped with a pressure screw cap. The reaction mixture was stirred under the irradiation of a 10 W blue LED ( $\lambda = 460\text{--}470$  nm; distance app. 1.0 cm from the bulb) for a specified time.

After that, the resulting mixture was quenched with H<sub>2</sub>O and extracted with EtOAc (3 x 10 mL). The combined organic phase was washed with brine (10 mL), dried over Na<sub>2</sub>SO<sub>4</sub>, and concentrated in vacuo. Purification of the crude product by flash chromatography on silica gel (petroleum ether/EtOAc: 8:1 to 5:1) furnishes the desired products **3** and **4** in yields listed in Scheme 3 and Scheme 4.

**The Visible-Light Photoredox Catalysis Experimental Setup (photographed by author Li-Na Guo)**

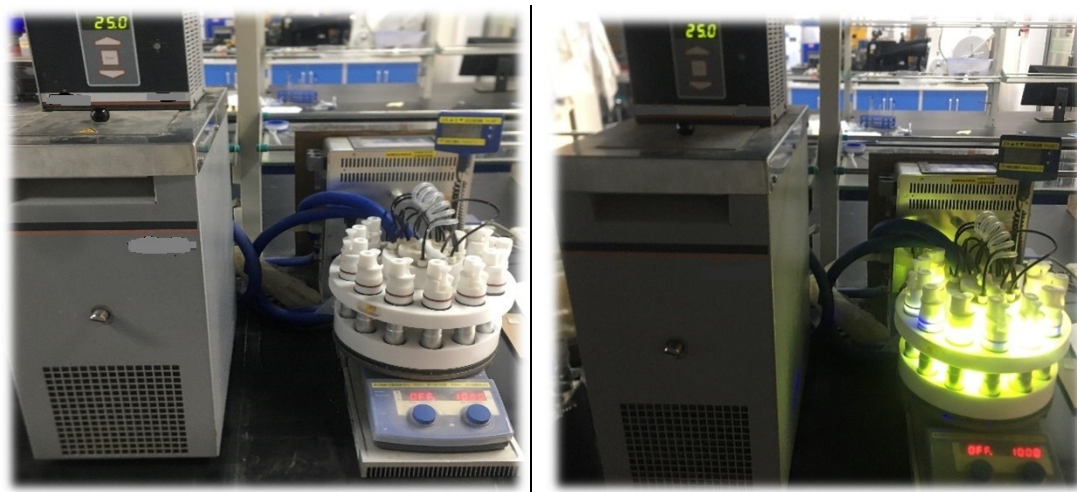

### Scale-up reaction

A 50 mL oven-dried reaction tube equipped with a magnetic stirrer was charged with *N*-phenyltetrahydroisoquinoline **2a** (2 mmol, 1.0 equiv.), *fac*-Ir(ppy)<sub>3</sub> (13 mg, 1 mol%) and CF<sub>3</sub>CO<sub>2</sub>Na (5 mmol, 2.5 equiv.) under N<sub>2</sub> atmosphere (glovebox). Subsequently, a solution of Dowd-Beckwith bromide **1a** (3 mmol, 1.5 equiv.) in NMP (20 mL) was added by a syringe. The tube was capped with a pressure screw cap. The reaction mixture was stirred under the irradiation of a 10 W blue LED ( $\lambda = 460\text{--}470$  nm; distance app. 1.0 cm from the bulb) for 60 h. After that, the resulting mixture was quenched with H<sub>2</sub>O and extracted with EtOAc (3 x 10 mL). The combined organic phase was washed with brine (10 mL), dried over Na<sub>2</sub>SO<sub>4</sub>, and concentrated in vacuo. Purification of the crude product by flash chromatography on silica gel (petroleum ether/EtOAc: 8:1 to 5:1) furnishes the desired product **3a** (70%, 527.8 mg).

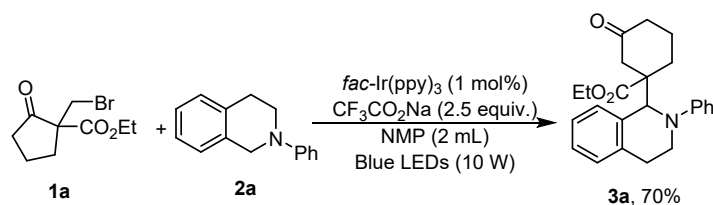

## 5 Mechanistic investigation

### (1) Radical inhibiting experiment

a) Ethyl 1-(bromomethyl)-2-oxocyclopentane-1-carboxylate **1a** (0.30 mmol, 1.5 equiv.), *N*-phenyltetrahydroisoquinoline **2a** (0.20 mmol, 1.0 equiv.), Pd(PPh<sub>3</sub>)<sub>4</sub> (4.6 mg, 2 mol%), CF<sub>3</sub>CO<sub>2</sub>Na (0.50 mmol, 2.5 equiv.), TEMPO (0.4 mmol, 2.0 equiv.), NMP (2.0 mL) under N<sub>2</sub> for 24 h, with the irradiation of 10 W Blue LEDs.

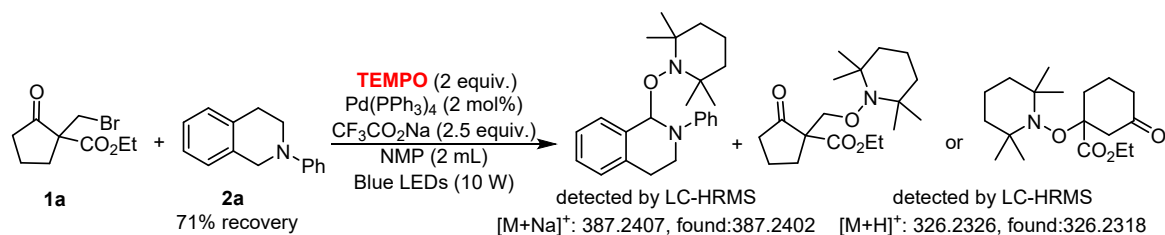

Item name: xh-28  
Item description:

Channel name: 2: Average Time 0.1753 min : TOF MSe (50-2000) 6eV ESI+ : Centroided : Combined

4.47e3

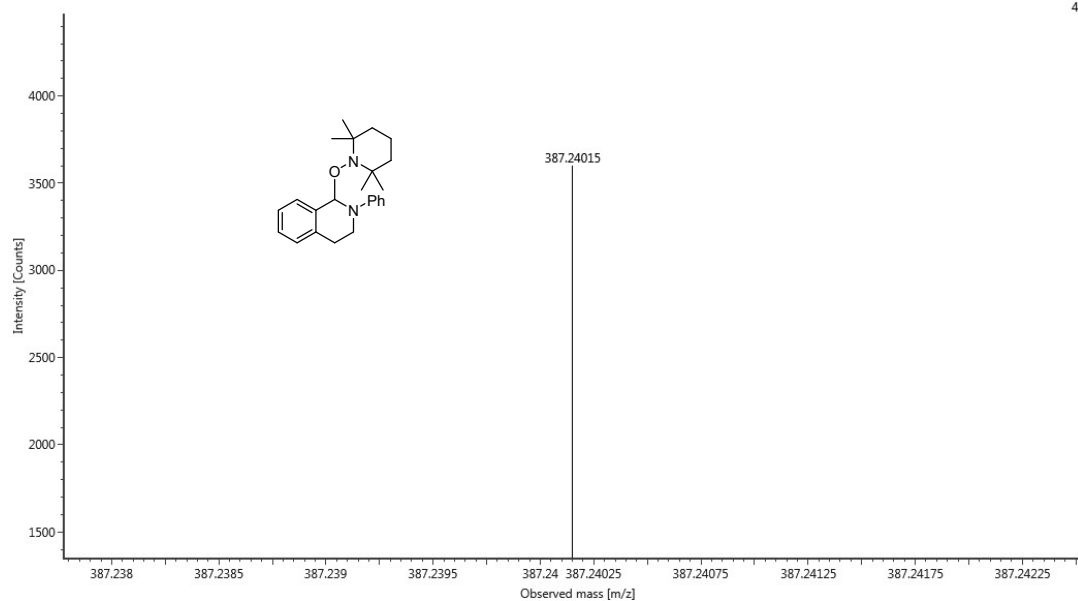

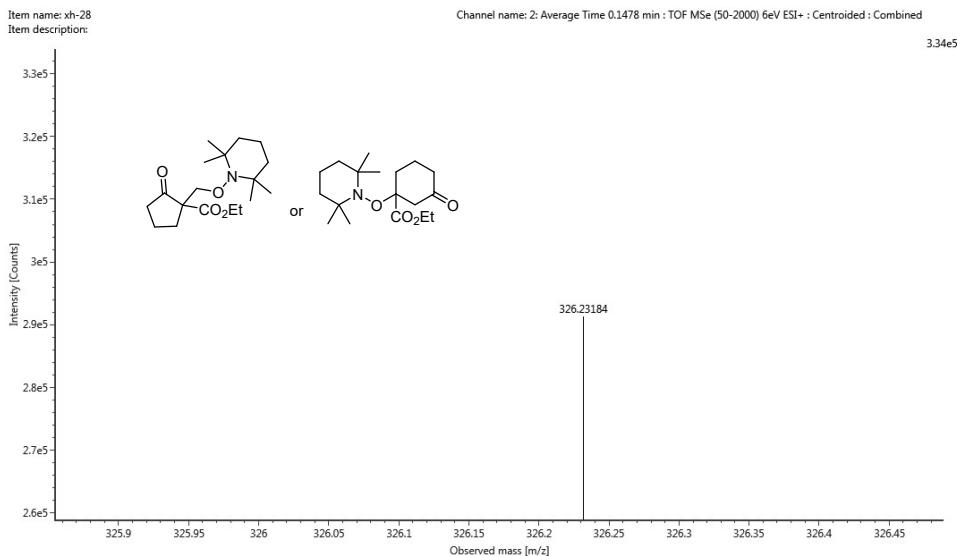

When 2.0 equiv. of TEMPO was subjected into the reaction of **1a** with **2a** under the standard conditions (Pd catalytic system), only a trace amount of **3a** was observed, along with the TEMPO adducts were detected by LC-HRMS (Calcd for  $C_{24}H_{32}N_2NaO$   $[M+Na]^+$ : 387.2407, found:387.2402, Calcd for  $C_{18}H_{32}NO_4$   $[M+H]^+$ : 326.2326, found: 326.2318). In this case, 71% of **2a** was recovered. This result indicates that a radical intermediate might be involved in this transformation.

b) Ethyl 1-(bromomethyl)-2-oxocyclopentane-1-carboxylate **1a** (0.30 mmol, 1.5 equiv.), *N*-phenyltetrahydroisoquinoline **2a** (0.20 mmol, 1.0 equiv.),  $Pd(PPh_3)_4$  (4.6 mg, 2 mol%),  $CF_3CO_2Na$  (0.50 mmol, 2.5 equiv.), BHT (2.0 equiv., 3.0 equiv.), NMP (2.0 mL) under  $N_2$  for 24 h, with the irradiation of 10 W Blue LEDs.

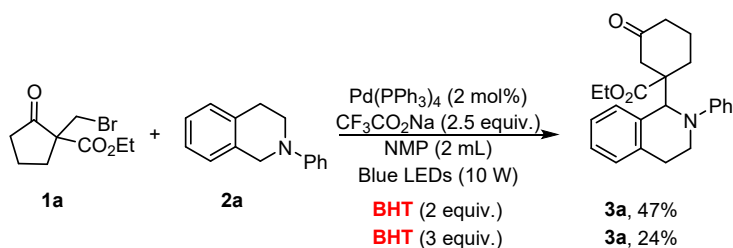

When 2.0 equiv and 3.0 equiv of BHT was added to the reaction of **1a** with **2a** under the standard conditions (Pd catalytic system), respectively, the yield of product **3a** was dramatically decreased (from 72% to 47% to and 24%). These results support a radical pathway for the reaction.

c) Ethyl 1-(bromomethyl)-2-oxocyclopentane-1-carboxylate **1a** (0.30 mmol, 1.5 equiv.), *N*-phenyltetrahydroisoquinoline **2a** (0.20 mmol, 1.0 equiv.), *fac*- $Ir(ppy)_3$  (1.3 mg, 1 mol%),



CF<sub>3</sub>CO<sub>2</sub>Na (0.50 mmol, 2.5 equiv.), TEMPO (0.4 mmol, 2.0 equiv.), NMP (2.0 mL) under N<sub>2</sub> for 24 h, with the irradiation of 10 W Blue LEDs.

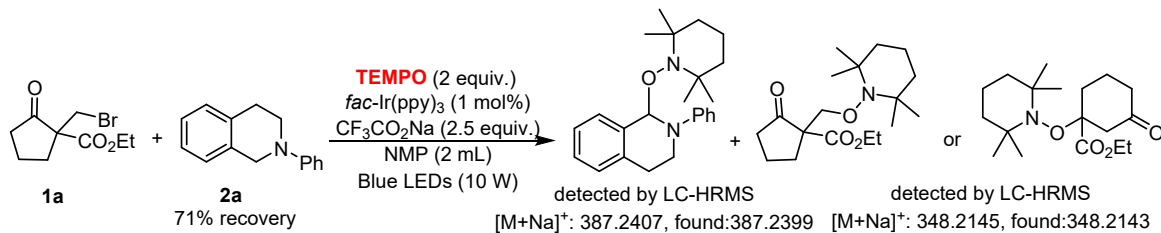

Item name: XH-51  
Item description:

Channel name: 2: Average Time 0.3267 min : TOF MS (50-2000) 6eV ESI+ : Centroided : Combined

8.11e3

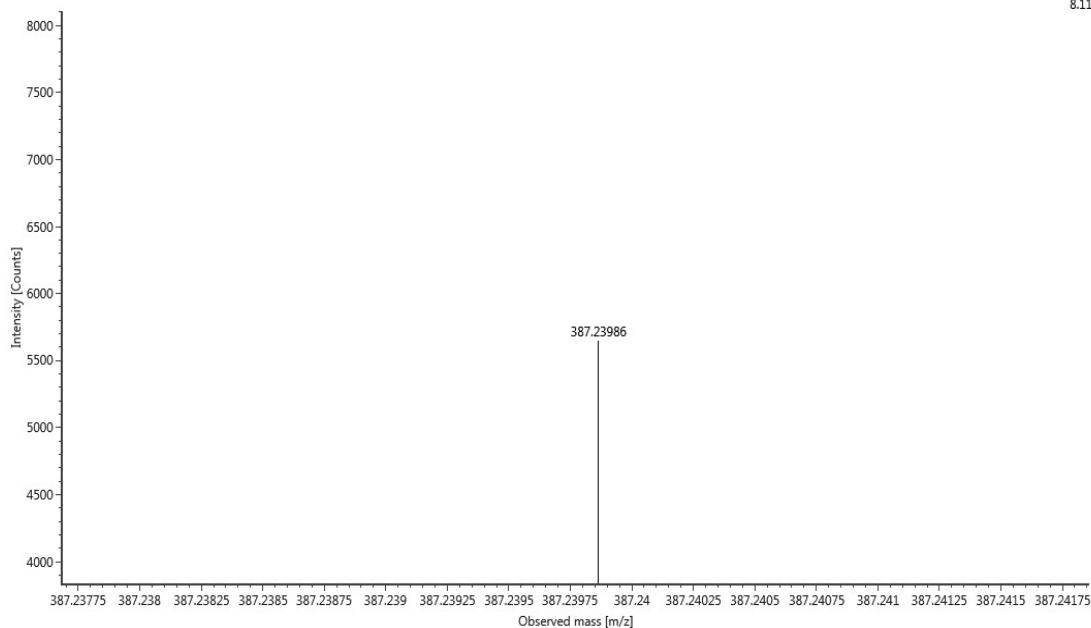

Item name: XH-51  
Item description:

Channel name: 2: Average Time 0.3267 min : TOF MS (50-2000) 6eV ESI+ : Centroided : Combined

1.02e6

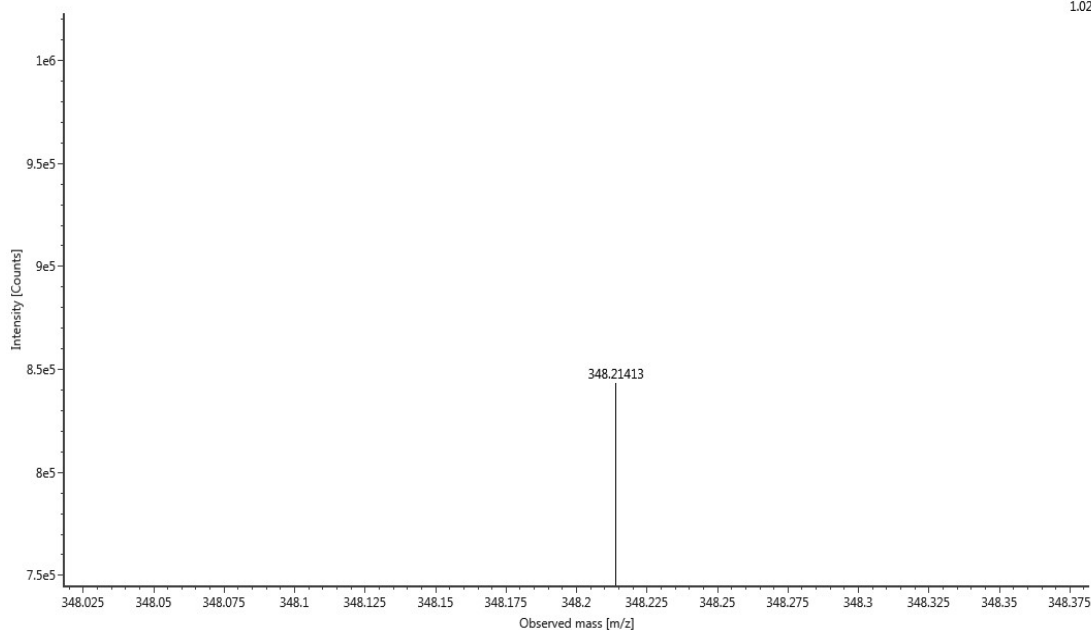

When 2.0 equiv of TEMPO was subjected into the reaction of **1a** with **2a** under the standard conditions (Ir catalytic system), the reaction is completely suppressed and the TEMPO adducts were detected by LC-HRMS (Calcd for  $C_{24}H_{32}N_2NaO$   $[M+Na]^+$ : 387.2407, found:387.2402, Calcd for  $C_{18}H_{32}NO_4$   $[M+Na]^+$ : 348.2145, found: 348.2143). This result indicates that a radical intermediate might be involved in this transformation.

d) Ethyl 1-(bromomethyl)-2-oxocyclopentane-1-carboxylate **1a** (0.30 mmol, 1.5 equiv), *N*-phenyltetrahydroisoquinoline **2a** (0.20 mmol, 1.0 equiv.), *fac*-Ir(ppy)<sub>3</sub> (1.3 mg, 1 mol%), CF<sub>3</sub>CO<sub>2</sub>Na (0.50 mmol, 2.5 equiv.), BHT (0.6 mmol, 3.0 equiv.), NMP (2.0 mL) under N<sub>2</sub> for 24 h, with the irradiation of 10 W Blue LEDs.

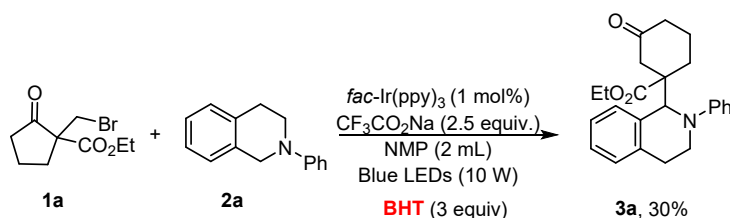

When 3.0 equiv of BHT was added to the reaction of **1a** with **2a** under the standard conditions (Ir catalytic system), the yield of product **3a** was dramatically decreased (from 78% to 30%). These results support a radical pathway for the reaction.

## (2) Control experiments

a) Ethyl 1-(bromomethyl)-2-oxocyclopentane-1-carboxylate **1a** (0.30 mmol, 1.5 equiv.), *N*-phenyltetrahydroisoquinoline **2a** (0.20 mmol, 1.0 equiv.), Pd(PPh<sub>3</sub>)<sub>4</sub> (4.6 mg, 2 mol%), CF<sub>3</sub>CO<sub>2</sub>Na (0.50 mmol, 2.5 equiv.), NMP (2.0 mL) under N<sub>2</sub> for 24 h, with the irradiation of 10 W Blue LEDs.

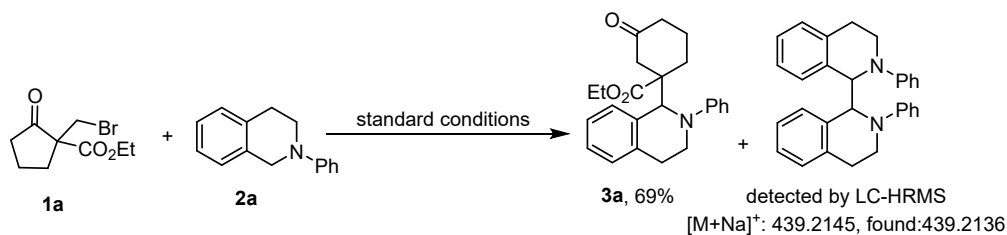

Item name: xh-29  
Item description:

Channel name: 2: Average Time 0.1787 min : TOF MSe (50-2000) 6eV ESI+ : Centroided : Combined

3.25e4

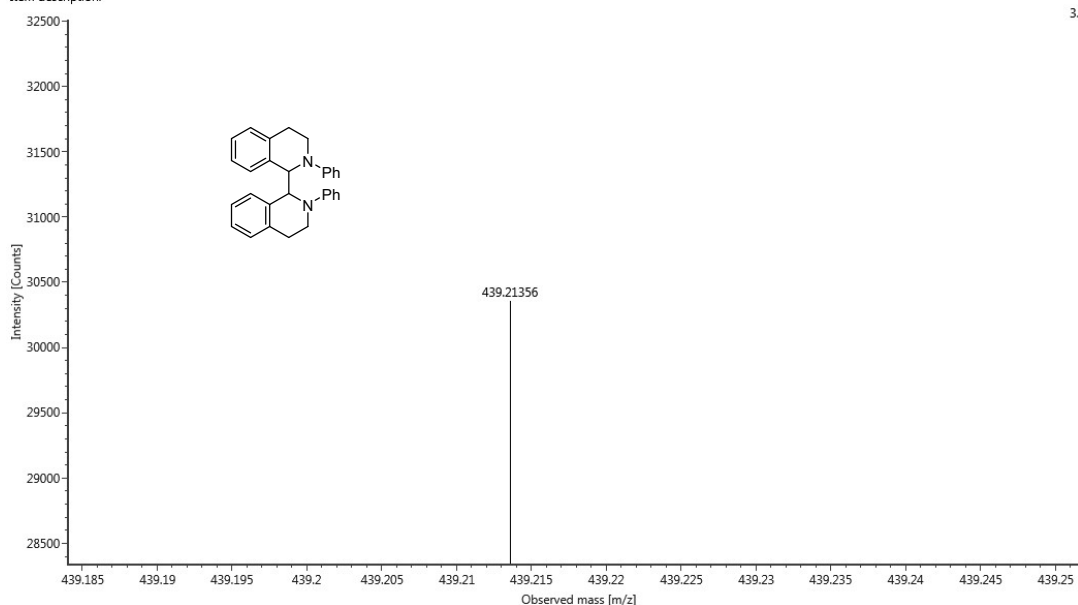

The product **3a** was isolated in 69% yield, along with the homo-coupling product was detected by LC-HRMS (Calcd for  $C_{30}H_{28}N_2Na$   $[M+Na]^+$ : 439.2145, found:439.2136) under standard condition . This result suggests that tetrahydroisoquinoline radical was generated in the reaction.

b) Ethyl 1-(bromomethyl)-2-oxocyclopentane-1-carboxylate **1a** (0.30 mmol, 1.5 equiv.), the imide salt **5a** (0.20 mmol, 1.0 equiv.)<sup>3</sup>,  $Pd(PPh_3)_4$  (115.4 mg, 0.5 equiv.),  $CF_3CO_2Na$  (0.50 mmol, 2.5 equiv.), NMP (2.0 mL) under  $N_2$  for 24 h, with the irradiation of 10 W Blue LEDs.

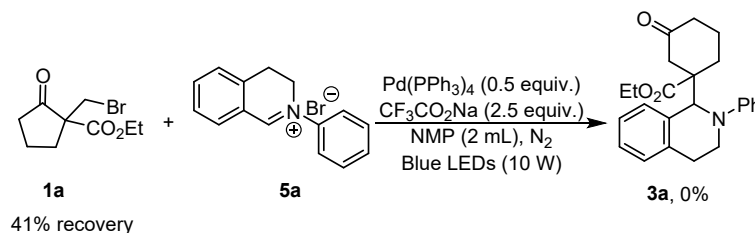

Ethyl 1-(bromomethyl)-2-oxocyclopentane-1-carboxylate **1a** (0.30 mmol, 1.5 equiv.), the imide salt **5a** (0.20 mmol, 1.0 equiv.), *fac*- $Ir(ppy)_3$  (1.3 mg, 1 mol%),  $CF_3CO_2Na$  (0.50 mmol, 2.5 equiv.), NMP (2.0 mL) under  $N_2$  for 24 h, with the irradiation of 10 W Blue LEDs.

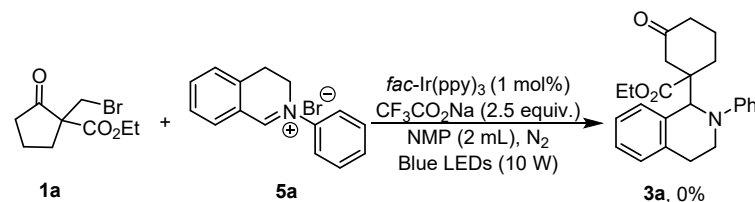

When the imide salt **5a** was used instead of **2a** under the standard conditions, no desired product **3a** was observed. This result indicates that the imide salt **5a** might not be the intermediate in this transformation.

### (3) Mass spectrometry experiments

**Procedure 1:** Pd(PPh<sub>3</sub>)<sub>4</sub> (0.05 mmol) and Ethyl 1-(bromomethyl)-2-oxocyclopentane-1-carboxylate **1a** (0.10 mmol) were dissolved in NMP (1 mL), and the mixture was stirred under the irradiation of a 10 W blue LED for 40 minutes. After 40 minutes, 5 μL reaction mixture was picked up and dissolved into 1 mL MeCN. The mixture was injected into the LC-HRMS, and we collected MS data. In addition, the reaction time extended to 24 h, 19% yield of **1a''** was obtained.

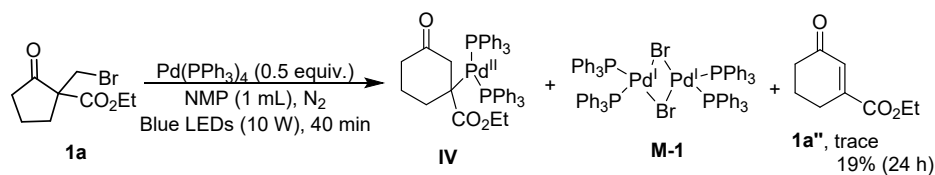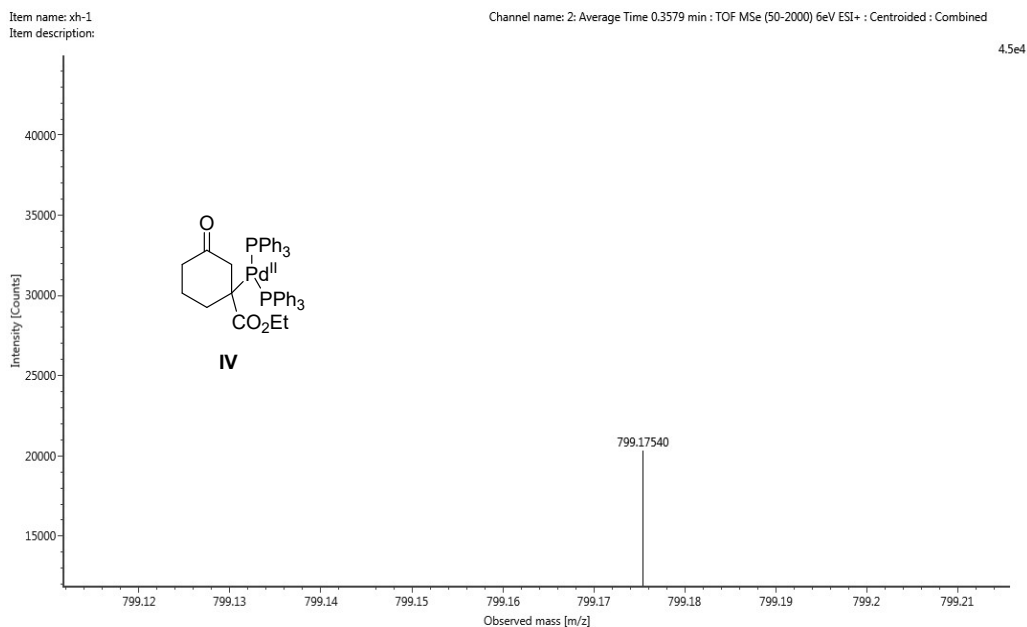

Item name: xh-1  
Item description:

Channel name: 2: Average Time 0.3923 min : TOF MSe (50-2000) 6eV ESI+ : Centroided : Combined

3.46e3

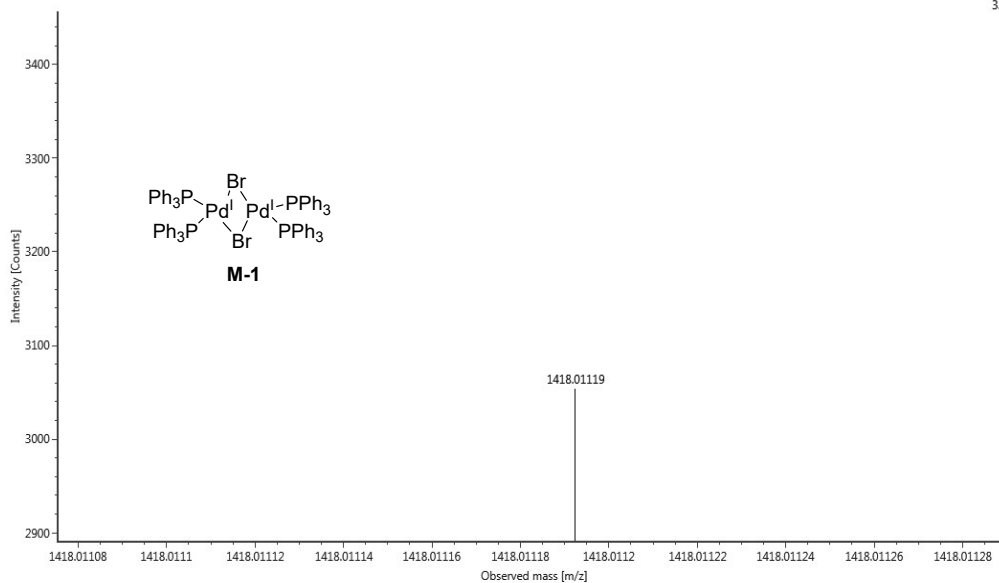

Item name: xh-1  
Item description:

Channel name: 2: Average Time 0.3785 min : TOF MSe (50-2000) 6eV ESI+ : Centroided : Combined

1.45e7

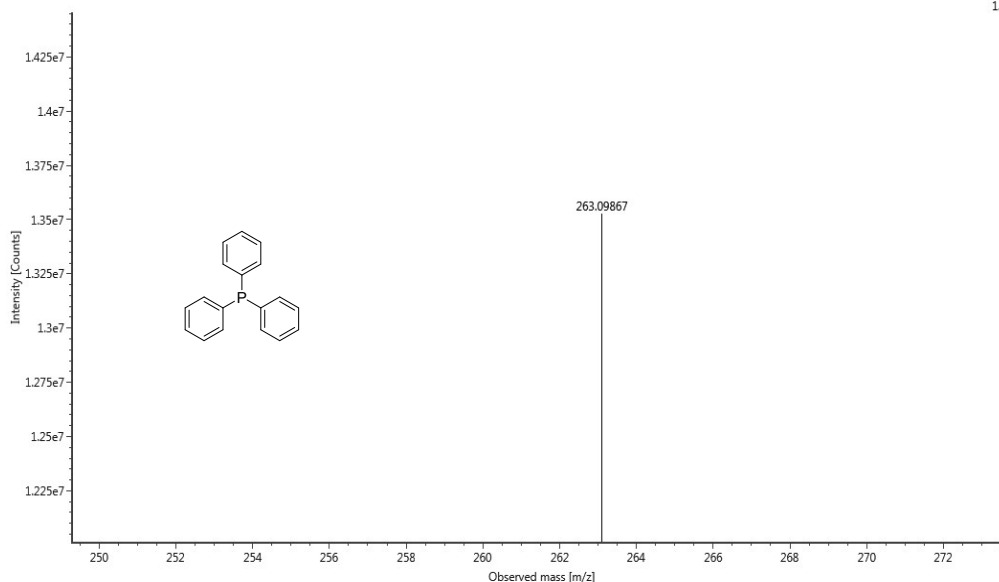

We successfully detected the intermediate **IV** signal (Calcd for C<sub>45</sub>H<sub>43</sub>O<sub>3</sub>P<sub>2</sub>Pd<sup>II</sup> [M]<sup>+</sup>:799.1722, found: 799.1754). In addition, the Pd(I) complex might undergo dimerization and release PPh<sub>3</sub> under visible-light irradiation, and the dimers **M-1** and PPh<sub>3</sub> was detected by LC-HRMS (**M-1**: Calcd for C<sub>72</sub>H<sub>60</sub>Br<sub>2</sub>P<sub>4</sub>Pd<sub>2</sub><sup>I</sup> [M]<sup>+</sup>:1418.0082, found: 1418.0112; PPh<sub>3</sub>: C<sub>18</sub>H<sub>16</sub>P [M+H]<sup>+</sup>: 263.0984, found: 263.0987).

**Procedure 2:** Ethyl 1-(bromomethyl)-2-oxocyclopentane-1-carboxylate **1a** (0.15 mmol), *N*-phenyltetrahydroisoquinoline **2a** (0.10 mmol), Pd(PPh<sub>3</sub>)<sub>4</sub> (0.05 mmol), CF<sub>3</sub>CO<sub>2</sub>Na (0.25 mmol), were dissolved in NMP (1 mL), and the mixture was stirred under the irradiation of a 10 W blue LED for 40 minutes. After 40 minutes, 5 μL reaction mixture was picked up and dissolved into 1 mL MeCN. The mixture was injected into the LC-HRMS, and we collected MS data.

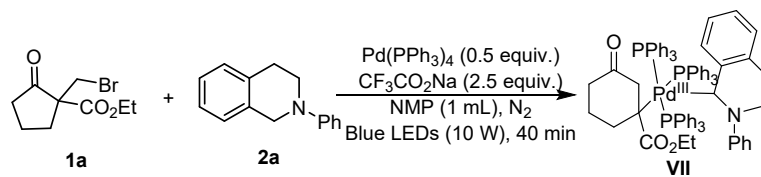

Item name: xh-2  
Item description:

Channel name: 2: Average Time 0.3959 min : TOF MSe (50-2000) 6eV ESI+ : Centroided : Combined

1.61e3

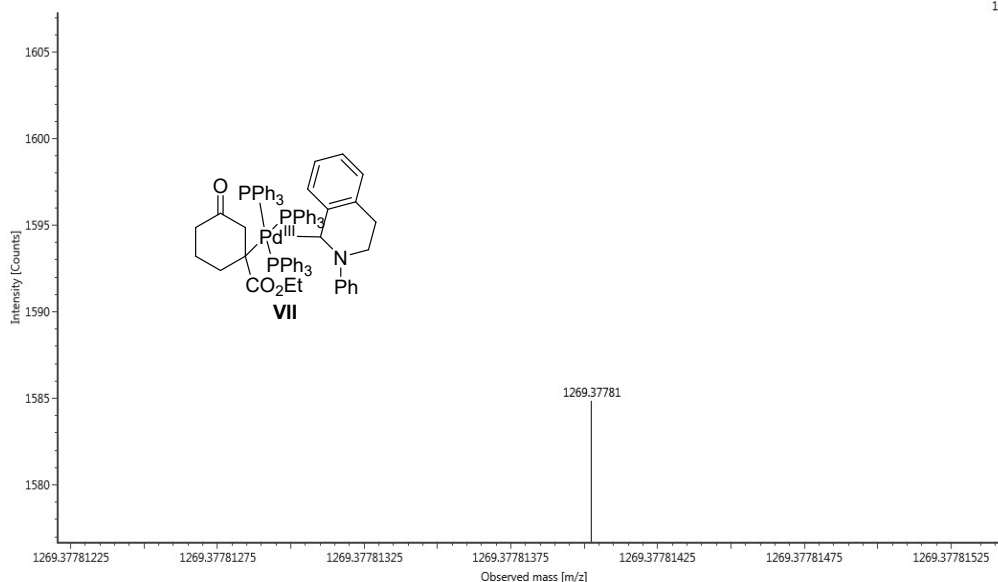

We successfully detected the intermediate **VII** signal (Calcd for C<sub>78</sub>H<sub>72</sub>NO<sub>3</sub>P<sub>3</sub>Pd<sup>III</sup> [M]<sup>+</sup>:1269.3760, found: 1269.3778). This result suggests that Pd(III) complex was generated in the reaction.

#### (4) <sup>31</sup>P NMR studies

Pd(PPh<sub>3</sub>)<sub>4</sub> (0.05 mmol) and Ethyl 1-(bromomethyl)-2-oxocyclopentane-1-carboxylate **1a** (0.10 mmol) were dissolved in DMF (1 mL), and the mixture was stirred under the irradiation of a 10 W blue LED for 4 h and 24 h .

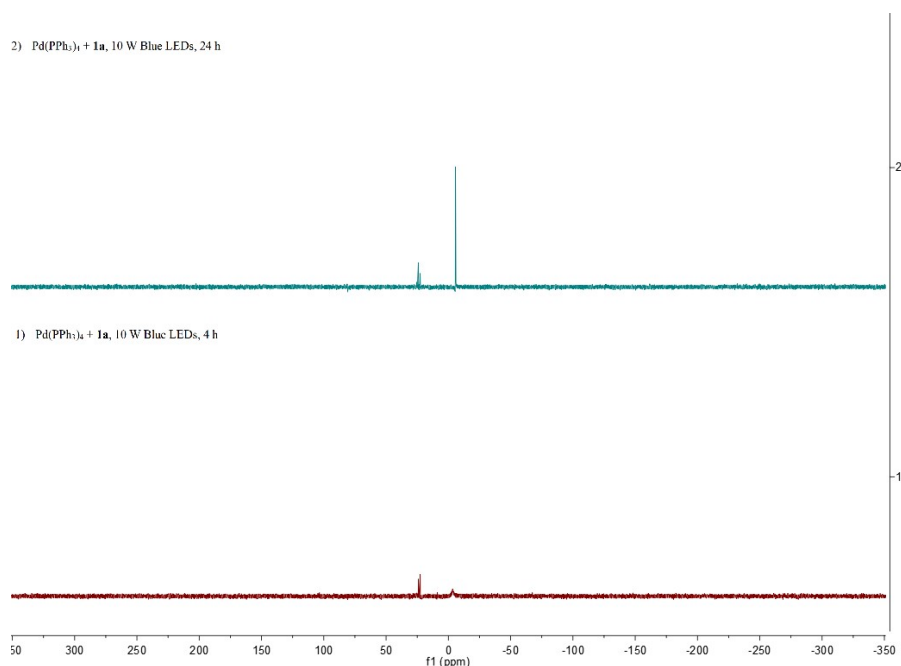

**Figure S1**  $^{31}\text{P}$  NMR Spectrum

The  $^{31}\text{P}$  NMR spectrum of the solution of  $\text{Pd}(\text{PPh}_3)_4$  in DMF exhibited a broad signal at 14.8 ppm<sup>[2]</sup>. When **1a** was added, new signals appeared at 22.6 ppm and 24.1 ppm after irradiation for 4 h and 24 h by 10 W Blue LEDs, this is attributable to the interaction between Pd species and **1a**, Pd(I) complex and Pd (II) complex would be generated. In addition, Pd(I) complex might undergo dimerization and release  $\text{PPh}_3$  (-5.7 ppm) under visible-light irradiation after 24 h.

##### **(5) Stern-volmer fluorescence quenching experiments**

To a solution of  $\text{Pd}(\text{PPh}_3)_4$  in anhydrous,  $\text{N}_2$ -saturated DMF ( $2 \times 10^{-3}$  mol/L) in a quartz cuvette, different amounts of Ethyl 1-(bromomethyl)-2-oxocyclopentane-1-carboxylate **1a** and *N*-phenyltetrahydroisoquinoline **2a** were added, respectively, and the resulting changes in fluorescence intensity (concentration of **1a** and **2a**:  $0.5 \times 10^{-3}$  mol/L,  $1.0 \times 10^{-3}$  mol/L,  $1.5 \times 10^{-3}$  mol/L,  $2.0 \times 10^{-3}$  mol/L,  $2.5 \times 10^{-3}$  mol/L) were collected. The emission intensity at 600 nm was collected with excited wavelength of 415 nm. The results are shown in Figure S2 and S3.

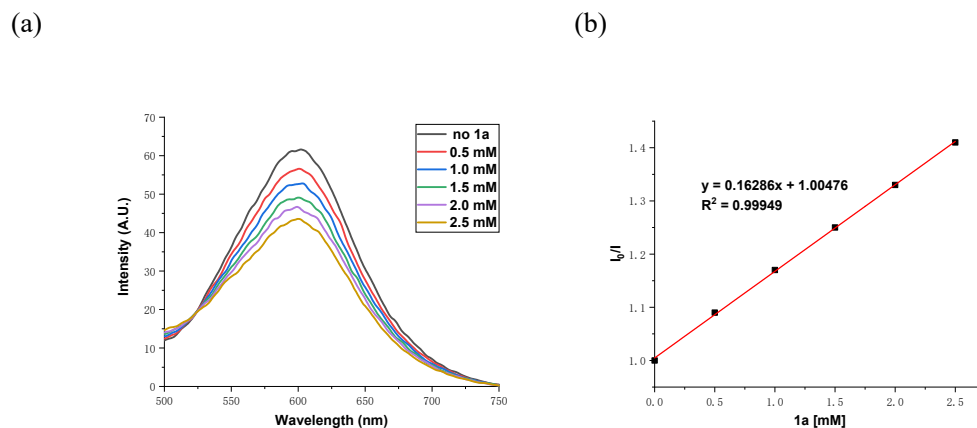

**Figure S2** (a) The fluorescence emission spectra of Pd(PPh<sub>3</sub>)<sub>4</sub> with different concentration of **1a** added. (b) The Stern–Volmer emission quenching studies of **1a**. I<sub>0</sub> is the inherent fluorescence intensity of Pd(PPh<sub>3</sub>)<sub>4</sub>. I is the fluorescence intensity of Pd(PPh<sub>3</sub>)<sub>4</sub> in the presence of **1a**.

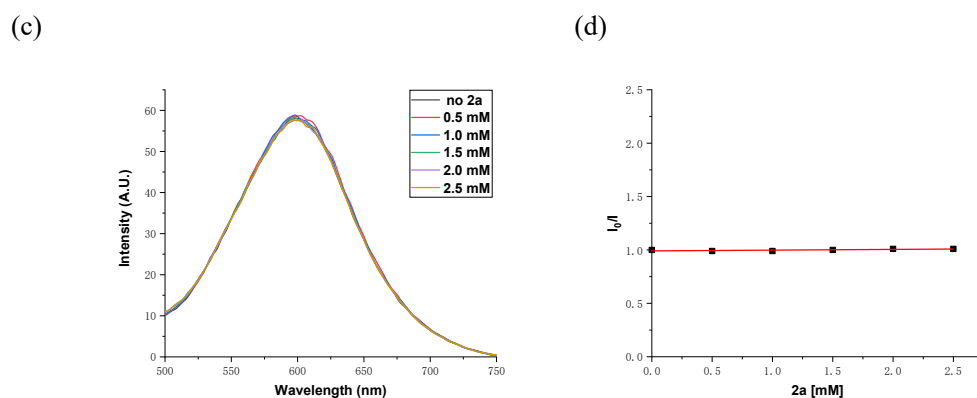

**Figure S3** (c) The fluorescence emission spectra of Pd(PPh<sub>3</sub>)<sub>4</sub> with different concentration of **2a** added. (d) The Stern–Volmer emission quenching studies of **2a**. I<sub>0</sub> is the inherent fluorescence intensity of Pd(PPh<sub>3</sub>)<sub>4</sub>. I is the fluorescence intensity of Pd(PPh<sub>3</sub>)<sub>4</sub> in the presence of **2a**.

According to the results as well as the corresponding Stern-Volmer plots (Figure S2, Figure S3), the substrate **1a** showed an obvious quenching effect to the fluorescence intensity of Pd(PPh<sub>3</sub>)<sub>4</sub>, where it presumably engages in SET event with the photoexcited Pd(0) complex. While the substrate **2a** did not show an obvious quenching effect to the fluorescence intensity of Pd(PPh<sub>3</sub>)<sub>4</sub>.

### (6) Light on-off experiments

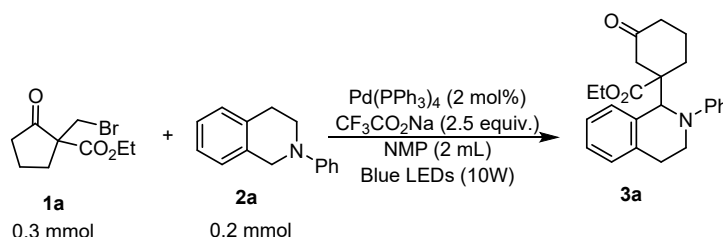

To further examine the impact of light, we conducted experiments under alternating periods of irradiation and darkness. The yield of **3a** was determined by crude <sup>1</sup>H NMR spectra using 1,3,5-



trimethoxybenzene as an internal standard.

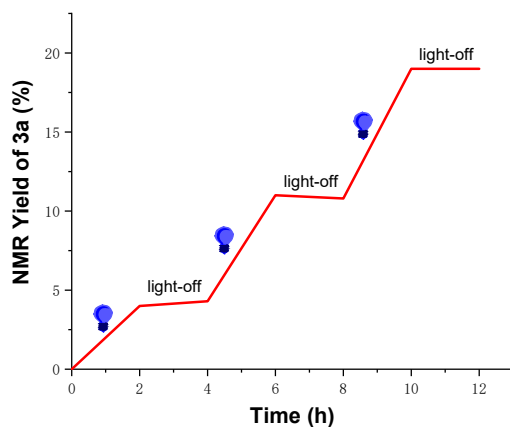

**Figure S4** Yield of Light On-Off Experiments

The results of light on-off experiments indicated that the reaction proceeded only under the irradiation of light, and the reaction may proceed by a catalytic process rather than by a radical chain process.

#### (7) Asymmetric experiments

Ethyl 1-(bromomethyl)-2-oxocyclopentane-1-carboxylate **1a** (0.30 mmol, 1.5 equiv.), *N*-phenyltetrahydroisoquinoline **2a** (0.20 mmol, 1.0 equiv.), Pd(PPh<sub>3</sub>)<sub>4</sub> (4.6 mg, 2 mol%), CF<sub>3</sub>CO<sub>2</sub>Na (0.50 mmol, 2.5 equiv.), chiral ligands (5 mol%), NMP (2.0 mL) under N<sub>2</sub> for 24 h, with the irradiation of 10 W Blue LEDs.

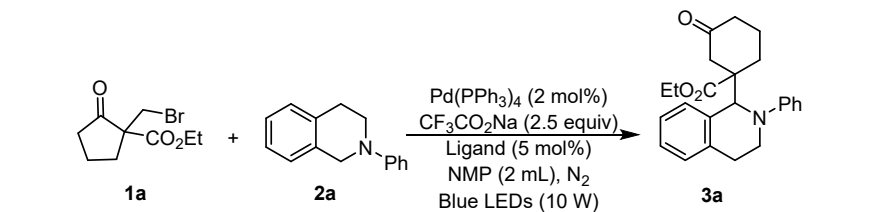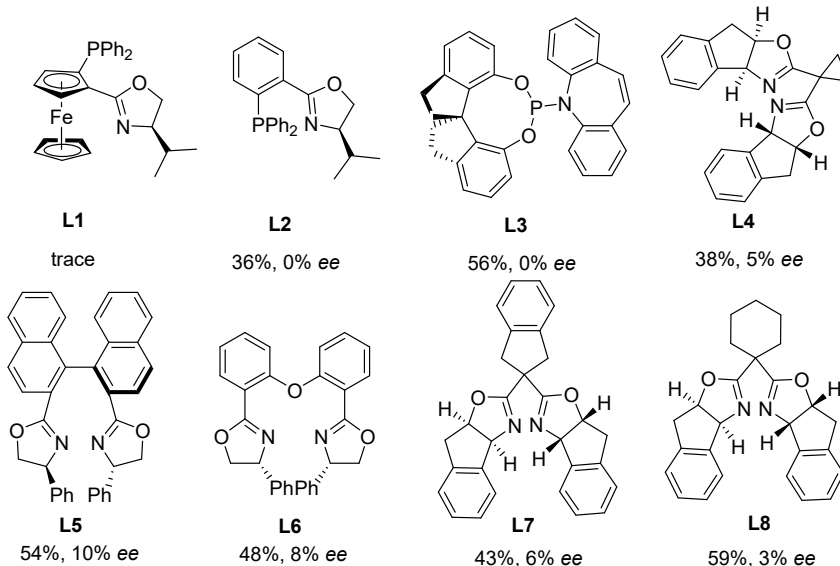

HPLC (CHIRALPAK AD-H, 4.6mm \* 250mmL, 5 μm, hexane/isopropanol = 9/1, flow 1.0 mL/min)

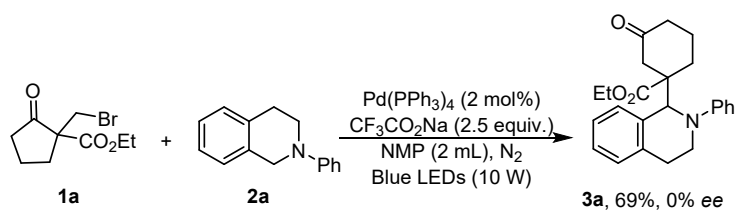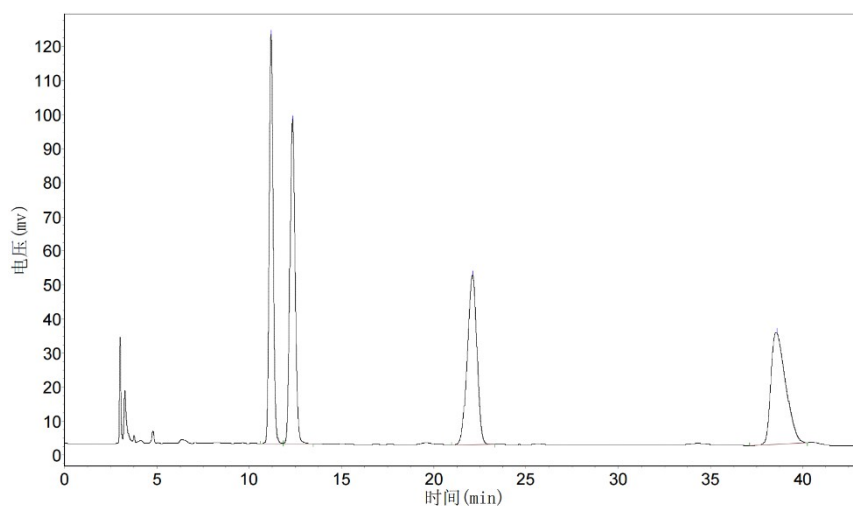

| No. | Retention Time | Area        | Height    | % Area  |
|-----|----------------|-------------|-----------|---------|
| 1   | 11.190         | 1884636.250 | 119830.00 | 25.3350 |
| 2   | 12.357         | 1864140.000 | 95451.000 | 25.0595 |
| 3   | 22.123         | 1810259.375 | 49852.637 | 24.3352 |
| 4   | 38.590         | 1879822.000 | 33133.953 | 25.2703 |

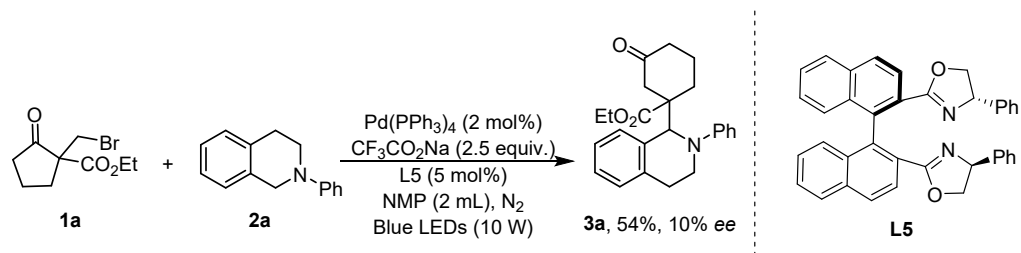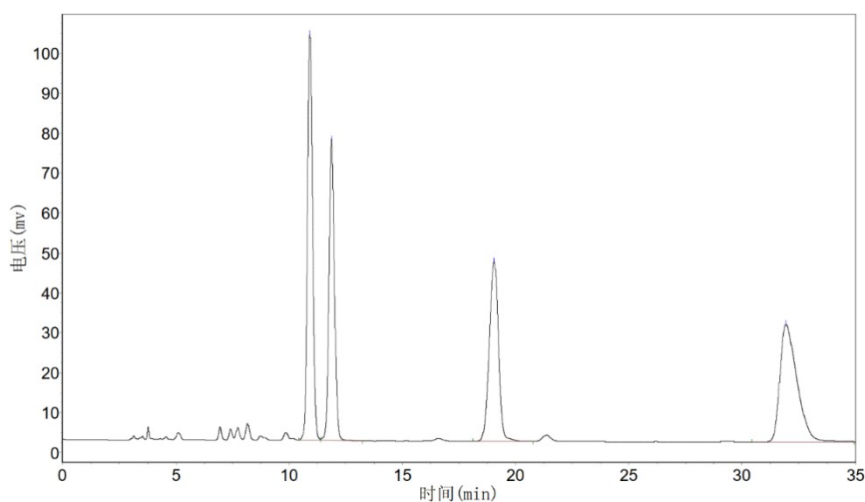

| No. | Retention Time | Area        | Height     | % Area  |
|-----|----------------|-------------|------------|---------|
| 1   | 10.923         | 1548569.750 | 101432.953 | 27.5073 |
| 2   | 11.890         | 1279814.875 | 75485.898  | 22.7334 |
| 3   | 19.057         | 1266737.125 | 44853.840  | 22.5011 |
| 4   | 31.940         | 1534549.000 | 29339.334  | 27.2582 |

### (8) Proposed reaction mechanism of Ir catalyst

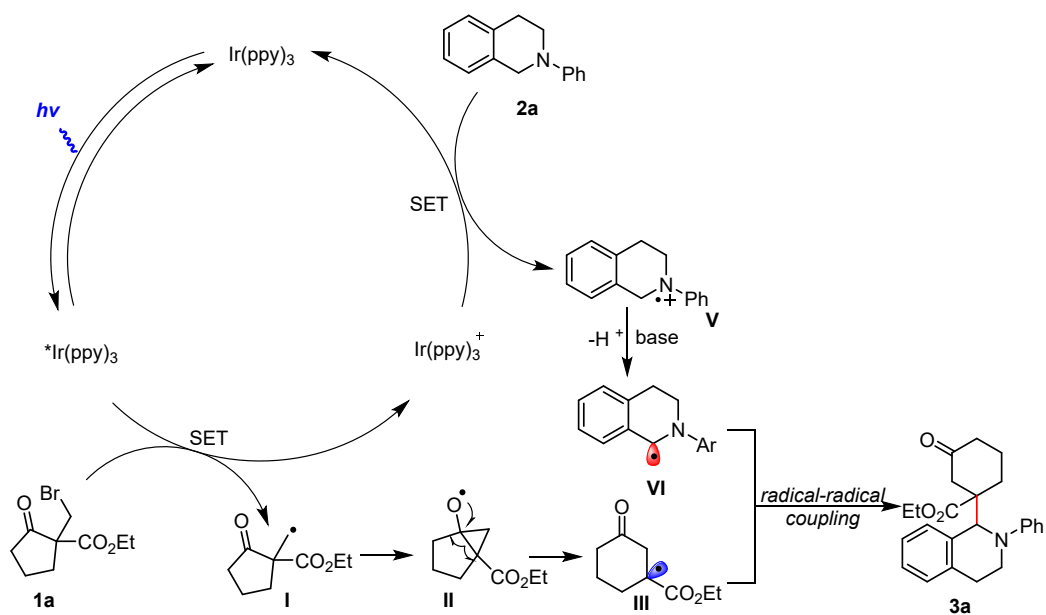

Based on the above results and the literature [2], a possible reaction pathway is proposed. Initially, the *fac*-Ir(ppy)<sub>3</sub> is activated to the excited state of *fac*-Ir(ppy)<sub>3</sub>\* under visible light irradiation.

Subsequently, bromide **1a** suffers from a single electron reduction with  $fac\text{-Ir(ppy)}_3^*$  to produce the alkyl radical **I** and putative  $fac\text{-Ir(ppy)}_3^+$ . The generated C-centred radical of side chain attacks the intramolecular carbonyl group of cyclic ketones to form a high-energy oxygen centred radical **II**, which triggers a C–C bond cleavage to accomplish ring enlargement, forming the radical intermediate **III**. Meanwhile,  $fac\text{-Ir(ppy)}_3^+$  undergoes a SET event with **2a** to produce the radical cation intermediate **V** and regenerate the  $fac\text{-Ir(ppy)}_3$ . Intermediate **V** is deprotonated by base to provide the radical intermediate **VI**. Finally, the radical-radical coupling between intermediates **III** and **VI** yields the desired product **3a**.

## 6 Characterization of products 3 and 4

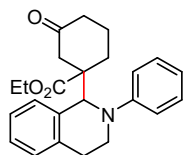

### Ethyl 3-oxo-1-(2-phenyl-1,2,3,4-tetrahydroisoquinolin-1-yl)cyclohexane-1-carboxylate (3a):

Following the Ir-catalyzed procedure. Light yellow oil (78%, 58.8 mg, 1:1 dr);  $R_f = 0.4$  (EtOAc/petroleum ether = 1:5);  $^1\text{H NMR}$  (400 MHz,  $\text{CDCl}_3$ ):  $\delta = 7.15\text{--}6.70$  (m, 9H), 5.37 (s, 0.5H), 5.00 (s, 0.5H), 4.04–3.49 (m, 4H), 3.09–2.53 (m, 3H), 2.35–2.25 (m, 2H), 2.07–1.79 (m, 4H), 1.57–1.45 (m, 1H), 1.11 (t,  $J = 7.2$  Hz, 1.5H), 0.95 (t,  $J = 7.2$  Hz, 1.5H);  $^{13}\text{C NMR}$  (100 MHz,  $\text{CDCl}_3$ ):  $\delta = 209.1, 208.9, 175.2, 173.8, 151.1, 151.0, 135.9, 135.3, 134.2, 133.6, 129.2, 129.0, 128.8, 128.1, 127.6, 127.3, 126.0, 125.7, 119.5, 118.5, 117.7, 115.7, 65.1, 63.6, 61.0, 58.6, 58.5, 47.0, 46.1, 44.9, 44.6, 40.0, 39.8, 33.2, 32.6, 26.9, 25.9, 21.9, 21.7, 13.9, 13.8$  ppm; IR (neat):  $\nu_{\text{max}}$  3061, 3022, 2940, 1715, 1596, 1497, 1451, 731  $\text{cm}^{-1}$ ; HRMS (ESI) calcd for  $\text{C}_{24}\text{H}_{28}\text{NO}_3$   $[\text{M}+\text{H}]^+$  378.2064, found 378.2067.

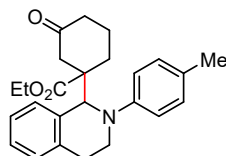

### Ethyl 3-oxo-1-(2-(*p*-tolyl)-1,2,3,4-tetrahydroisoquinolin-1-yl)cyclohexane-1-carboxylate (3b):

Following the Pd-catalyzed procedure. Light yellow oil (72%, 56.3 mg, 1:1 dr);  $R_f = 0.4$  (EtOAc/petroleum ether = 1:5);  $^1\text{H NMR}$  (400 MHz,  $\text{CDCl}_3$ ):  $\delta = 7.24\text{--}6.86$  (m, 8H), 5.35 (s, 0.5H), 5.00 (s, 0.5H), 4.13–3.45 (m, 4H), 3.16–2.58 (m, 3H), 2.42–2.23 (m, 6H), 2.12–1.85 (m, 3H), 1.57–1.51 (m, 1H), 1.17 (t,  $J = 7.2$  Hz, 1.5H), 1.03 (t,  $J = 7.2$  Hz, 1.5H);  $^{13}\text{C NMR}$  (100 MHz,  $\text{CDCl}_3$ ):  $\delta = 209.2, 209.1, 175.2, 173.9, 149.3, 149.2, 137.2, 135.6, 134.3, 133.6, 131.1, 129.8, 128.2, 127.2, 126.0, 125.6, 118.6, 116.8, 65.6, 64.0, 60.9, 58.9, 58.6, 46.8, 45.9, 45.8, 40.0, 39.8, 33.1, 32.7, 27.1, 26.0, 21.9, 21.7, 20.3, 20.2, 13.8, 13.7$  ppm; IR (neat):  $\nu_{\text{max}}$  3057, 2959, 1717, 1614, 1569, 1451, 753  $\text{cm}^{-1}$ ; HRMS (ESI) calcd for  $\text{C}_{25}\text{H}_{30}\text{NO}_3$   $[\text{M}+\text{H}]^+$  392.2220, found 392.2223.

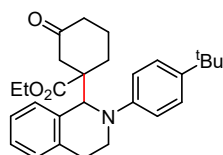

### Ethyl 3-oxo-1-(2-(4-(*tert*-butyl)phenyl)-1,2,3,4-tetrahydroisoquinolin-1-yl)cyclohexane-1-

**carboxylate (3c):** Following the Ir-catalyzed procedure. Light yellow oil (72%, 62.4 mg, 1:1 dr);  $R_f = 0.4$  (EtOAc/petroleum ether = 1:5);  $^1\text{H NMR}$  (400 MHz,  $\text{CDCl}_3$ ):  $\delta = 7.29\text{-}6.89$  (m, 8H), 5.39 (s, 0.5H), 5.04 (s, 0.5H), 4.17-3.48 (m, 4H), 3.17-2.59 (m, 3H), 2.39-2.31 (m, 2H), 2.04-1.86 (m, 4H), 1.58-1.49 (m, 1H), 1.28-1.25 (s, 9H), 1.18 (t,  $J = 7.2$  Hz, 1.4H), 1.01 (t,  $J = 7.2$  Hz, 1.4H);  $^{13}\text{C NMR}$  (100 MHz,  $\text{CDCl}_3$ ):  $\delta = 209.3, 209.1, 175.3, 173.9, 148.9, 148.8, 142.5, 141.4, 136.2, 135.5, 134.4, 133.8, 129.2, 128.8, 128.2, 127.2, 126.0, 125.9, 125.7, 125.6, 117.8, 115.5, 65.5, 64.0, 61.4, 61.0, 58.6, 58.5, 46.9, 46.1, 45.4, 44.8, 40.0, 39.9, 33.9, 33.8, 33.0, 32.7, 31.4, 31.3, 27.0, 26.2, 22.0, 21.7, 13.9, 13.8$  ppm; IR (neat):  $\nu_{\text{max}} 3028, 2957, 1718, 1610, 1514, 1458, 738$   $\text{cm}^{-1}$ ; HRMS (ESI) calcd for  $\text{C}_{28}\text{H}_{36}\text{NO}_3$   $[\text{M}+\text{H}]^+$  434.2690, found 434.2697.

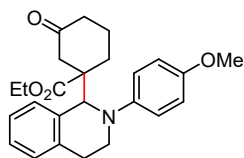

**Ethyl 1-(2-(4-methoxyphenyl)-1,2,3,4-tetrahydroisoquinolin-1-yl)-3-oxocyclohexane-1-carboxylate (3d):** Following the Ir-catalyzed procedure. Light yellow oil (51%, 41.5 mg, 1:1 dr);  $R_f = 0.2$  (EtOAc/petroleum ether = 1:5);  $^1\text{H NMR}$  (400 MHz,  $\text{CDCl}_3$ ):  $\delta = 7.25\text{-}6.74$  (m, 8H), 5.20 (s, 0.4H), 4.93 (s, 0.5H), 4.09-3.65 (m, 6H), 3.35-3.15 (m, 2H), 2.88-2.70 (m, 2H), 2.54-2.30 (m, 2H), 2.04-1.76 (m, 4H), 1.53-1.45 (m, 1H), 1.14 (t,  $J = 7.2$  Hz, 1.4H), 1.02 (t,  $J = 7.2$  Hz, 1.7H);  $^{13}\text{C NMR}$  (100 MHz,  $\text{CDCl}_3$ ):  $\delta = 209.5, 209.3, 175.1, 174.0, 154.3, 153.7, 146.5, 146.2, 136.8, 136.2, 134.4, 133.5, 129.2, 128.7, 128.5, 127.1, 126.0, 125.6, 122.1, 120.5, 114.6, 114.3, 66.4, 65.1, 61.1, 60.8, 59.4, 58.6, 55.5, 55.4, 48.2, 46.0, 45.5, 40.1, 39.9, 33.0, 32.7, 27.6, 26.6, 21.8, 13.9, 13.8$  ppm; IR (neat):  $\nu_{\text{max}} 3061, 2945, 1718, 1615, 1508, 1455, 754$   $\text{cm}^{-1}$ ; HRMS (ESI) calcd for  $\text{C}_{25}\text{H}_{29}\text{NNaO}_4$   $[\text{M}+\text{Na}]^+$  430.1989, found 430.1998.

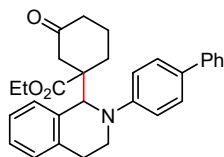

**Ethyl 1-(2-([1,1'-biphenyl]-4-yl)-1,2,3,4-tetrahydroisoquinolin-1-yl)-3-oxocyclohexane-1-carboxylate (3e):** Following the Pd-catalyzed procedure. Light yellow oil (64%, 58.0 mg, 1:1.9 dr);  $R_f = 0.4$  (EtOAc/petroleum ether = 1:5);  $^1\text{H NMR}$  (400 MHz,  $\text{CDCl}_3$ ):  $\delta = 7.48\text{-}6.93$  (m, 13H), 5.43 (s, 0.4H), 5.05 (s, 0.6H), 4.10-3.53 (m, 4H), 3.09-2.55 (m, 3H), 2.38-2.25 (m, 2H), 2.11-1.77 (m, 4H), 1.54-1.42 (m, 1H), 1.12 (t,  $J = 7.2$  Hz, 1.2H), 0.97 (t,  $J = 7.2$  Hz, 1.8H);  $^{13}\text{C NMR}$  (100

MHz, CDCl<sub>3</sub>):  $\delta$  = 209.0, 208.8, 175.3, 173.8, 150.2, 140.8, 140.7, 135.8, 135.2, 133.6, 131.1, 128.6, 127.7, 127.3, 126.4, 126.3, 126.1, 125.8, 117.3, 115.5, 65.1, 63.6, 58.6, 58.5, 47.2, 46.2, 44.5, 44.3, 40.0, 39.8, 33.2, 32.7, 27.0, 26.0, 22.0, 21.7, 13.9, 13.8 ppm; IR (neat):  $\nu_{\max}$  3057, 3028, 2963, 1721, 1607, 1522, 1452, 758 cm<sup>-1</sup>; HRMS (ESI) calcd for C<sub>30</sub>H<sub>31</sub>NNaO<sub>3</sub> [M+Na]<sup>+</sup> 476.2196, found 476.2197.

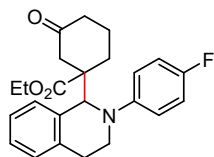

**Ethyl 1-(2-(4-fluorophenyl)-1,2,3,4-tetrahydroisoquinolin-1-yl)-3-oxocyclohexane-1-carboxylate (3f):** Following the Ir-catalyzed procedure. Light yellow oil (78%, 61.6 mg, 1:1 dr);  $R_f$  = 0.4 (EtOAc/petroleum ether = 1:5); <sup>1</sup>H NMR (400 MHz, CDCl<sub>3</sub>):  $\delta$  = 7.23-6.86 (m, 8H), 5.24 (s, 0.5H), 4.95 (s, 0.5H), 4.13-3.45 (m, 4H), 3.16-2.57 (m, 3H), 2.42-2.25 (m, 2H), 2.17-1.77 (m, 4H), 1.57-1.47 (m, 1H), 1.15 (t,  $J$  = 7.2 Hz, 1.5H), 1.02 (t,  $J$  = 7.2 Hz, 1.5H); <sup>13</sup>C NMR (100 MHz, CDCl<sub>3</sub>):  $\delta$  = 209.1, 209.0, 175.0, 173.9, 157.4 (d,  $J$  = 238.3 Hz), 156.7 (d,  $J$  = 237.3 Hz), 136.3, 135.6, 134.0, 133.2, 129.3, 128.8, 128.4, 127.7, 127.4 (d,  $J$  = 4.5 Hz), 126.1, 125.8, 121.1 (d,  $J$  = 7.7 Hz), 118.9 (d,  $J$  = 7.5 Hz), 115.7 (d,  $J$  = 22.0 Hz), 115.4 (d,  $J$  = 22.0 Hz), 66.1, 64.7, 61.3, 60.9, 58.9, 58.6, 47.1, 46.7, 46.3, 45.9, 40.0, 39.8, 33.2, 32.6, 27.1, 26.2, 21.8, 21.7, 13.8 ppm; <sup>19</sup>F NMR (376 MHz, CDCl<sub>3</sub>):  $\delta$  = -124.74, -126.32 (s, 1F); IR (neat):  $\nu_{\max}$  3061, 2948, 1719, 1611, 1507, 1455, 753 cm<sup>-1</sup>; HRMS (ESI) calcd for C<sub>24</sub>H<sub>27</sub>FNO<sub>3</sub> [M+H]<sup>+</sup> 396.1969, found 396.1963.

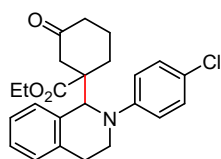

**Ethyl 1-(2-(4-chlorophenyl)-1,2,3,4-tetrahydroisoquinolin-1-yl)-3-oxocyclohexane-1-carboxylate (3g):** Following the Ir-catalyzed procedure. Light yellow oil (75%, 61.7 mg, 1:1.2 dr);  $R_f$  = 0.4 (EtOAc/petroleum ether = 1:5); <sup>1</sup>H NMR (400 MHz, CDCl<sub>3</sub>):  $\delta$  = 7.23-6.86 (m, 8H), 5.35 (s, 0.5H), 4.99 (s, 0.4H), 4.16-3.47 (m, 4H), 3.12-2.59 (m, 3H), 2.42-2.32 (m, 2H), 2.17-1.77 (m, 4H), 1.58-1.49 (m, 1H), 1.18 (t,  $J$  = 7.2 Hz, 1.6H), 1.04 (t,  $J$  = 7.2 Hz, 1.4H); <sup>13</sup>C NMR (100 MHz, CDCl<sub>3</sub>):  $\delta$  = 208.9, 208.6, 175.1, 173.7, 149.6, 149.5, 135.7, 135.1, 133.9, 133.2, 129.4, 129.1, 128.9, 128.8, 128.1, 127.8, 127.5, 127.3, 126.2, 125.8, 124.4, 123.4, 118.9, 116.9, 65.3, 63.8, 61.5, 61.1, 58.6, 58.4, 46.9, 46.1, 45.0, 44.8, 40.0, 39.8, 33.3, 32.6, 26.9, 25.8, 21.9, 21.6, 13.9, 13.8 ppm;

IR (neat):  $\nu_{\max}$  3060, 2938, 1718, 1593, 1495, 1452, 747  $\text{cm}^{-1}$ ; HRMS (ESI) calcd for  $\text{C}_{24}\text{H}_{27}\text{ClNO}_3$   $[\text{M}+\text{H}]^+$  412.1674, found 412.1681.

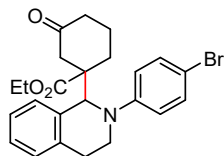

**Ethyl 1-(2-(4-bromophenyl)-1,2,3,4-tetrahydroisoquinolin-1-yl)-3-oxocyclohexane-1-carboxylate (3h):** Following the Ir-catalyzed procedure. Light yellow oil (55%, 50.1 mg, 1:1 dr);  $R_f = 0.4$  (EtOAc/petroleum ether = 1:5);  $^1\text{H}$  NMR (400 MHz,  $\text{CDCl}_3$ ):  $\delta = 7.34\text{--}6.81$  (m, 8H), 5.37 (s, 0.4H), 4.99 (s, 0.5H), 4.14–3.49 (m, 4H), 3.11–2.57 (m, 3H), 2.43–2.33 (m, 2H), 2.18–1.80 (m, 4H), 1.61–1.48 (m, 1H), 1.18 (t,  $J = 7.2$  Hz, 1.3H), 1.05 (t,  $J = 7.2$  Hz, 1.5H);  $^{13}\text{C}$  NMR (100 MHz,  $\text{CDCl}_3$ ):  $\delta = 208.9, 208.6, 175.0, 173.7, 149.9, 149.8, 135.6, 135.0, 133.7, 133.2, 132.0, 131.8, 129.4, 128.9, 128.1, 127.8, 127.5, 127.2, 126.2, 125.8, 119.1, 117.3, 111.5, 65.2, 61.6, 61.1, 58.5, 58.4, 47.0, 46.0, 44.7, 40.0, 39.8, 33.3, 32.5, 26.9, 25.7, 21.9, 21.6, 13.9$  ppm; IR (neat):  $\nu_{\max}$  3058, 2931, 1721, 1601, 1495, 1451, 743  $\text{cm}^{-1}$ ; HRMS (ESI) calcd for  $\text{C}_{24}\text{H}_{27}\text{BrNO}_3$   $[\text{M}+\text{H}]^+$  456.1169, found 456.1171.

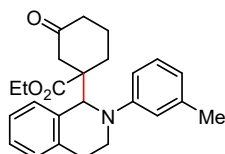

**Ethyl 3-oxo-1-(2-(*m*-tolyl)-1,2,3,4-tetrahydroisoquinolin-1-yl)cyclohexane-1-carboxylate (3i):** Following the Ir-catalyzed procedure. Light yellow oil (72%, 56.3 mg, 1:1 dr);  $R_f = 0.4$  (EtOAc/petroleum ether = 1:5);  $^1\text{H}$  NMR (400 MHz,  $\text{CDCl}_3$ ):  $\delta = 7.24\text{--}6.61$  (m, 8H), 5.43 (s, 0.5H), 5.07 (s, 0.5H), 4.16–3.52 (m, 4H), 3.16–2.60 (m, 3H), 2.38–2.28 (m, 6H), 2.18–1.74 (m, 3H), 1.62–1.48 (m, 1H), 1.19 (t,  $J = 7.2$  Hz, 1.5H), 1.04 (t,  $J = 7.2$  Hz, 1.5H);  $^{13}\text{C}$  NMR (100 MHz,  $\text{CDCl}_3$ ):  $\delta = 209.1, 208.9, 175.3, 173.9, 151.2, 151.1, 139.0, 138.6, 136.0, 135.4, 134.3, 133.7, 128.9, 128.8, 128.1, 127.5, 127.3, 127.2, 126.0, 125.6, 120.4, 119.5, 118.5, 116.6, 65.2, 63.7, 61.0, 58.6, 58.5, 47.1, 46.2, 44.9, 44.6, 40.0, 39.8, 33.1, 32.6, 27.0, 26.1, 22.0, 21.9, 21.7, 21.6, 13.9, 13.8$  ppm; IR (neat):  $\nu_{\max}$  3057, 2958, 1719, 1600, 1493, 1450, 759  $\text{cm}^{-1}$ ; HRMS (ESI) calcd for  $\text{C}_{25}\text{H}_{29}\text{NNaO}_3$   $[\text{M}+\text{Na}]^+$  414.2040, found 414.2038.



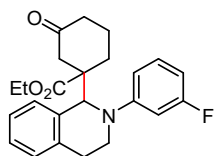

**Ethyl 1-(2-(3-fluorophenyl)-1,2,3,4-tetrahydroisoquinolin-1-yl)-3-oxocyclohexane-1-carboxylate (3j):** Following the Ir-catalyzed procedure. Light yellow oil (72%, 56.9 mg, 1:1 dr);  $R_f = 0.4$  (EtOAc/petroleum ether = 1:5);  $^1\text{H NMR}$  (400 MHz,  $\text{CDCl}_3$ ):  $\delta = 7.13\text{-}6.43$  (m, 8H), 5.41 (s, 0.5H), 5.04 (s, 0.5H), 4.17-3.56 (m, 4H), 3.11-2.61 (m, 3H), 2.45-2.29 (m, 2H), 2.17-1.79 (m, 4H), 1.63-1.48 (m, 1H), 1.20 (t,  $J = 7.2$  Hz, 1.5H), 1.06 (t,  $J = 7.2$  Hz, 1.5H);  $^{13}\text{C NMR}$  (100 MHz,  $\text{CDCl}_3$ ):  $\delta = 208.8, 208.4, 175.0, 173.6, 163.9$  (d,  $J = 241.3$  Hz), 163.7 (d,  $J = 241.5$  Hz), 152.3 (d,  $J = 6.0$  Hz), 152.2 (d,  $J = 5.9$  Hz), 135.3, 134.8, 133.9, 133.3, 130.2 (d,  $J = 10.2$  Hz), 130.0 (d,  $J = 10.0$  Hz), 129.3, 129.0, 127.9, 127.8, 127.5, 127.2, 126.1, 125.8, 111.8 (d,  $J = 2.2$  Hz), 110.2 (d,  $J = 2.1$  Hz), 105.4 (d,  $J = 21.3$  Hz), 104.5 (d,  $J = 21.3$  Hz), 103.4 (d,  $J = 25.0$  Hz), 101.8 (d,  $J = 25.9$  Hz), 65.0, 63.5, 61.5, 61.1, 58.3, 58.2, 47.2, 46.3, 43.9, 43.8, 39.9, 39.7, 33.2, 32.4, 26.8, 25.7, 21.9, 21.6, 13.8, 13.7 ppm;  $^{19}\text{F NMR}$  (376 MHz,  $\text{CDCl}_3$ ):  $\delta = -111.85, -112.38$  (s, 1F); IR (neat):  $\nu_{\text{max}}$  3063, 2980, 1720, 1614, 1578, 1451, 756  $\text{cm}^{-1}$ ; HRMS (ESI) calcd for  $\text{C}_{24}\text{H}_{26}\text{FNNaO}_3$  [ $\text{M}+\text{Na}$ ] $^+$  418.1789, found 418.1794.

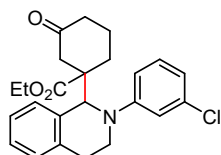

**Ethyl 1-(2-(3-chlorophenyl)-1,2,3,4-tetrahydroisoquinolin-1-yl)-3-oxocyclohexane-1-carboxylate (3k):** Following the Ir-catalyzed procedure. Light yellow oil (71%, 58.4 mg, 1:1.3 dr);  $R_f = 0.4$  (EtOAc/petroleum ether = 1:5);  $^1\text{H NMR}$  (400 MHz,  $\text{CDCl}_3$ ):  $\delta = 7.22\text{-}6.73$  (m, 8H), 5.40 (s, 0.5H), 5.04 (s, 0.4H), 4.18-3.56 (m, 4H), 3.11-2.61 (m, 3H), 2.45-1.77 (m, 6H), 1.58-1.49 (m, 1H), 1.21 (t,  $J = 7.2$  Hz, 1.6H), 1.07 (t,  $J = 7.2$  Hz, 1.3H);  $^{13}\text{C NMR}$  (100 MHz,  $\text{CDCl}_3$ ):  $\delta = 208.7, 208.4, 175.0, 173.7, 151.8, 135.4, 135.1, 134.9, 134.8, 133.8, 133.2, 130.2, 129.9, 129.4, 129.0, 127.9, 127.3, 126.2, 125.9, 119.0, 118.1, 116.8, 115.0, 114.8, 113.0, 65.0, 63.5, 61.2, 58.3, 58.2, 47.1, 46.3, 44.1, 44.0, 40.0, 39.8, 33.3, 32.5, 26.8, 25.8, 21.9, 21.6, 13.9, 13.8$  ppm; IR (neat):  $\nu_{\text{max}}$  3052, 2983, 1722, 1592, 1485, 1451, 756  $\text{cm}^{-1}$ ; HRMS (ESI) calcd for  $\text{C}_{24}\text{H}_{27}\text{ClNO}_3$  [ $\text{M}+\text{H}$ ] $^+$  412.1674, found 412.1681.

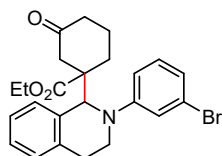

**Ethyl 1-(2-(3-bromophenyl)-1,2,3,4-tetrahydroisoquinolin-1-yl)-3-oxocyclohexane-1-carboxylate (3l):** Following the Ir-catalyzed procedure. Light yellow oil (58%, 52.8 mg, 1:1 dr);  $R_f = 0.4$  (EtOAc/petroleum ether = 1:5);  $^1\text{H NMR}$  (400 MHz,  $\text{CDCl}_3$ ):  $\delta = 7.24\text{-}6.85$  (m, 8H), 5.41 (s, 0.4H), 5.03 (s, 0.4H), 4.18-3.53 (m, 4H), 3.11-2.58 (m, 3H), 2.45-2.32 (m, 2H), 2.19-1.83 (m, 4H), 1.61-1.42 (m, 1H), 1.21 (t,  $J = 7.2$  Hz, 1.4H), 1.07 (t,  $J = 7.2$  Hz, 1.4H);  $^{13}\text{C NMR}$  (100 MHz,  $\text{CDCl}_3$ ):  $\delta = 208.8, 208.5, 175.0, 173.6, 151.9, 151.7, 135.4, 134.8, 133.6, 133.2, 130.5, 130.2, 129.0, 128.1, 127.6, 127.2, 126.3, 125.9, 123.5, 123.0, 122.0, 119.7, 118.0, 115.3, 113.7, 65.0, 61.7, 61.2, 58.3, 47.1, 46.1, 44.2, 40.0, 39.8, 33.3, 32.4, 26.8, 25.8, 21.9, 21.6, 13.9, 13.8$  ppm; IR (neat):  $\nu_{\text{max}} 3060, 2987, 1718, 1597, 1485, 1451, 754$   $\text{cm}^{-1}$ ; HRMS (ESI) calcd for  $\text{C}_{24}\text{H}_{27}\text{BrNO}_3$   $[\text{M}+\text{H}]^+$  456.1169, found 456.1165.

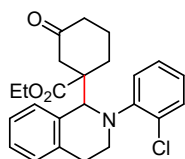

**Ethyl 1-(2-(2-chlorophenyl)-1,2,3,4-tetrahydroisoquinolin-1-yl)-3-oxocyclohexane-1-carboxylate (3m):** Following the Pd-catalyzed procedure. Light yellow oil (30%, 24.7 mg, 1:1 dr);  $R_f = 0.4$  (EtOAc/petroleum ether = 1:5);  $^1\text{H NMR}$  (400 MHz,  $\text{CDCl}_3$ ):  $\delta = 7.44\text{-}6.98$  (m, 8H), 5.23 (s, 0.5H), 5.04 (s, 0.5H), 4.07-3.54 (m, 4H), 3.25-2.63 (m, 3H), 2.36-1.81 (m, 6H), 1.35-1.30 (m, 1H), 1.10 (t,  $J = 7.2$  Hz, 1.5H), 0.97 (t,  $J = 7.2$  Hz, 1.5H);  $^{13}\text{C NMR}$  (100 MHz,  $\text{CDCl}_3$ ):  $\delta = 210.2, 209.3, 174.8, 174.1, 151.3, 150.0, 137.5, 137.3, 134.2, 133.5, 131.6, 131.3, 130.8, 130.5, 128.9, 128.5, 128.2, 127.5, 127.4, 127.1, 126.5, 126.2, 125.7, 125.4, 125.1, 66.9, 66.7, 61.2, 60.9, 58.9, 50.3, 48.7, 45.1, 43.5, 40.1, 39.8, 32.5, 32.4, 29.5, 28.1, 21.8, 21.4, 13.8, 13.6$  ppm; IR (neat):  $\nu_{\text{max}} 3058, 2963, 1723, 1585, 1476, 755$   $\text{cm}^{-1}$ ; HRMS (ESI) calcd for  $\text{C}_{24}\text{H}_{26}\text{ClNNaO}_3$   $[\text{M}+\text{Na}]^+$  434.1493, found 434.1497.

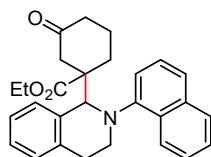

**Ethyl 1-(2-(naphthalen-1-yl)-1,2,3,4-tetrahydroisoquinolin-1-yl)-3-oxocyclohexane-1-carboxylate (3n):** Following the Ir-catalyzed procedure. Light yellow oil (69%, 58.9 mg, 1:1 dr);

$R_f = 0.4$  (EtOAc/petroleum ether = 1:5);  $^1\text{H NMR}$  (400 MHz,  $\text{CDCl}_3$ ):  $\delta = 8.33\text{-}7.04$  (m, 11H), 5.35 (s, 0.5H), 5.16 (s, 0.4H), 4.08-3.34 (m, 4H), 3.22-2.82 (m, 3H), 2.70-2.24 (m, 2H), 2.13-1.81 (m, 4H), 1.46-1.31 (m, 1H), 1.07 (t,  $J = 7.2$  Hz, 1.6H), 0.61 (t,  $J = 7.2$  Hz, 1.4H);  $^{13}\text{C NMR}$  (100 MHz,  $\text{CDCl}_3$ ):  $\delta = 210.0, 209.3, 174.8, 174.2, 151.0, 137.6, 137.3, 135.1, 134.6, 133.8, 129.8, 129.2, 128.7, 128.1, 127.5, 127.1, 126.2, 126.1, 126.0, 125.9, 125.8, 125.6, 124.5, 124.0, 123.4, 67.8, 67.4, 60.9, 60.7, 60.6, 59.4, 51.4, 50.2, 45.4, 44.5, 40.1, 39.8, 32.9, 32.5, 28.8, 21.7, 21.5, 13.8, 13.2$  ppm; IR (neat):  $\nu_{\text{max}}$  3054, 2943, 1720, 1580, 1455, 739  $\text{cm}^{-1}$ ; HRMS (ESI) calcd for  $\text{C}_{28}\text{H}_{30}\text{NO}_3$   $[\text{M}+\text{H}]^+$  428.2220, found 428.2231.

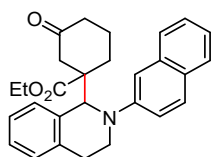

**Ethyl 1-(2-(naphthalen-2-yl)-1,2,3,4-tetrahydroisoquinolin-1-yl)-3-oxocyclohexane-1-carboxylate (3o):** Following the Ir-catalyzed procedure. Light yellow oil (59%, 50.4 mg, 1:1 dr);  $R_f = 0.4$  (EtOAc/petroleum ether = 1:5);  $^1\text{H NMR}$  (400 MHz,  $\text{CDCl}_3$ ):  $\delta = 7.73\text{-}7.08$  (m, 11H), 5.59 (s, 0.3H), 5.21 (s, 0.7H), 4.15-3.70 (m, 4H), 3.20-2.65 (m, 3H), 2.49-2.33 (m, 2H), 2.12-1.87 (m, 4H), 1.64-1.49 (m, 1H), 1.19 (t,  $J = 7.2$  Hz, 1.6H), 0.97 (t,  $J = 7.2$  Hz, 1.4H);  $^{13}\text{C NMR}$  (100 MHz,  $\text{CDCl}_3$ ):  $\delta = 209.0, 208.9, 175.2, 173.8, 148.8, 148.7, 135.8, 135.3, 134.7, 134.4, 134.2, 133.5, 129.0, 128.3, 128.1, 127.8, 127.7, 127.4, 127.3, 126.5, 126.1, 125.8, 123.3, 123.1, 120.2, 118.7, 112.4, 110.6, 65.2, 63.7, 61.4, 61.1, 58.7, 58.6, 47.1, 46.2, 44.9, 44.8, 40.0, 39.8, 33.4, 32.7, 27.0, 25.8, 21.9, 21.7, 13.9, 13.8$  ppm; IR (neat):  $\nu_{\text{max}}$  3052, 2984, 1722, 1627, 1596, 1508, 1469, 755  $\text{cm}^{-1}$ ; HRMS (ESI) calcd for  $\text{C}_{28}\text{H}_{29}\text{NNaO}_3$   $[\text{M}+\text{Na}]^+$  450.2040, found 450.2044.

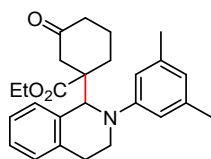

**Ethyl 1-(2-(3,5-dimethylphenyl)-1,2,3,4-tetrahydroisoquinolin-1-yl)-3-oxocyclohexane-1-carboxylate (3p):** Following the Pd-catalyzed procedure. Light yellow oil (60%, 48.6 mg, 1:1.4 dr);  $R_f = 0.4$  (EtOAc/petroleum ether = 1:5);  $^1\text{H NMR}$  (400 MHz,  $\text{CDCl}_3$ ):  $\delta = 7.20\text{-}6.46$  (m, 7H), 5.42 (s, 0.4H), 5.05 (s, 0.5H), 4.15-3.51 (m, 4H), 3.15-2.58 (m, 3H), 2.42-2.23 (m, 8H), 2.05-1.89 (m, 4H), 1.62-1.48 (m, 1H), 1.20 (t,  $J = 7.2$  Hz, 1.3H), 1.05 (t,  $J = 7.2$  Hz, 1.7H);  $^{13}\text{C NMR}$  (100 MHz,  $\text{CDCl}_3$ ):  $\delta = 209.3, 209.1, 175.4, 173.9, 151.3, 138.8, 138.4, 136.0, 135.4, 134.4, 133.8, 129.2,$

128.9, 128.1, 127.5, 127.3, 127.2, 126.0, 125.6, 121.5, 120.6, 115.6, 113.7, 65.3, 63.6, 61.4, 61.0, 58.5, 47.1, 46.2, 44.9, 44.6, 40.1, 39.9, 33.1, 32.7, 27.0, 26.1, 24.5, 22.0, 21.8, 21.7, 21.6, 13.9, 13.8 ppm; IR (neat):  $\nu_{\max}$  3052, 2941, 1719, 1595, 1473, 1453, 752  $\text{cm}^{-1}$ ; HRMS (ESI) calcd for  $\text{C}_{26}\text{H}_{32}\text{NO}_3$   $[\text{M}+\text{H}]^+$  406.2377, found 406.2369.

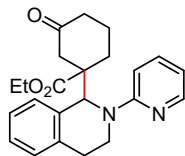

**Ethyl 3-oxo-1-(2-(pyridin-2-yl)-1,2,3,4-tetrahydroisoquinolin-1-yl)cyclohexane-1-carboxylate**

**(3q):** Following the Ir-catalyzed procedure. Light yellow oil (67%, 50.7 mg, 1:1 dr);  $R_f = 0.2$  (EtOAc/petroleum ether = 1:5);  $^1\text{H}$  NMR (400 MHz,  $\text{CDCl}_3$ ):  $\delta = 8.18\text{--}6.59$  (m, 8H), 6.32 (s, 0.5H), 6.14 (s, 0.4H), 4.01–3.68 (m, 4H), 3.09–2.77 (m, 3H), 2.53–1.95 (m, 6H), 1.59–1.39 (m, 1H), 1.08 (t,  $J = 7.2$  Hz, 1.8H), 1.01 (t,  $J = 7.2$  Hz, 1.1H);  $^{13}\text{C}$  NMR (100 MHz,  $\text{CDCl}_3$ ):  $\delta = 209.6, 209.3, 174.8, 174.3, 147.3, 137.7, 135.1, 134.7, 128.4, 128.3, 128.0, 127.5, 127.4, 125.9, 125.8, 112.8, 106.6, 61.2, 61.0, 60.7, 60.3, 58.0, 57.9, 48.6, 46.7, 42.1, 42.0, 40.1, 40.0, 32.8, 32.4, 27.4, 27.3, 22.2, 21.9, 13.7$  ppm; IR (neat):  $\nu_{\max}$  3057, 2979, 1718, 1593, 1471, 1436, 761  $\text{cm}^{-1}$ ; HRMS (ESI) calcd for  $\text{C}_{23}\text{H}_{27}\text{N}_2\text{O}_3$   $[\text{M}+\text{H}]^+$  379.2016, found 379.2022.

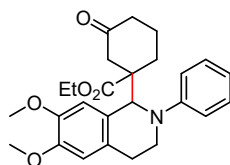

**Ethyl 1-(6,7-dimethoxy-2-phenyl-1,2,3,4-tetrahydroisoquinolin-1-yl)-3-oxocyclohexane-1-carboxylate (3r):**

Following the Pd-catalyzed procedure. Light yellow oil (54%, 47.2 mg, 1:1 dr);  $R_f = 0.2$  (EtOAc/petroleum ether = 1:5);  $^1\text{H}$  NMR (400 MHz,  $\text{CDCl}_3$ ):  $\delta = 7.24\text{--}6.47$  (m, 7H), 5.40 (s, 0.3H), 4.96 (s, 0.6H), 4.21–3.53 (m, 10H), 3.14–2.56 (m, 3H), 2.43–2.33 (m, 2H), 2.12–1.86 (m, 4H), 1.62–1.47 (m, 1H), 1.20 (t,  $J = 7.2$  Hz, 1.0H), 1.03 (t,  $J = 7.2$  Hz, 1.7H);  $^{13}\text{C}$  NMR (100 MHz,  $\text{CDCl}_3$ ):  $\delta = 209.2, 209.0, 175.7, 173.9, 151.2, 148.4, 148.1, 147.1, 146.8, 129.2, 129.0, 128.3, 127.6, 125.9, 125.2, 119.6, 118.7, 117.9, 115.9, 111.8, 111.4, 111.3, 110.2, 65.0, 63.1, 61.0, 58.7, 58.5, 56.1, 55.8, 55.7, 47.0, 45.9, 44.8, 44.7, 40.0, 39.9, 33.3, 32.6, 26.5, 25.4, 22.0, 21.6, 14.0, 13.8$  ppm; IR (neat):  $\nu_{\max}$  3056, 2939, 1721, 1599, 1512, 1461, 755  $\text{cm}^{-1}$ ; HRMS (ESI) calcd for  $\text{C}_{26}\text{H}_{32}\text{NO}_5$   $[\text{M}+\text{H}]^+$  438.2275, found 438.2271.

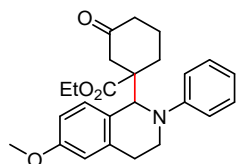

**Ethyl 1-(6-methoxy-2-phenyl-1,2,3,4-tetrahydroisoquinolin-1-yl)-3-oxocyclohexane-1-carboxylate (3s):** Following the Pd-catalyzed procedure. Light yellow oil (57%, 46.4 mg, 1:1 dr);  $R_f = 0.2$  (EtOAc/petroleum ether = 1:5);  $^1\text{H NMR}$  (400 MHz,  $\text{CDCl}_3$ ):  $\delta = 7.24\text{--}6.65$  (m, 8H), 5.37 (s, 0.5H), 5.01 (s, 0.5H), 4.16–3.52 (m, 7H), 3.14–2.60 (m, 3H), 2.41–1.83 (m, 6H), 1.54–1.48 (m, 1H), 1.18 (t,  $J = 7.2$  Hz, 1.5H), 1.02 (t,  $J = 7.2$  Hz, 1.6H);  $^{13}\text{C NMR}$  (100 MHz,  $\text{CDCl}_3$ ):  $\delta = 209.3$ , 209.1, 175.3, 173.9, 158.8, 158.7, 151.2, 137.4, 136.7, 129.2, 129.1, 129.0, 128.4, 126.4, 125.7, 119.6, 118.7, 117.9, 115.9, 113.8, 113.6, 112.0, 111.9, 64.8, 63.2, 61.4, 61.0, 58.8, 58.7, 55.2, 47.0, 46.2, 44.9, 44.7, 40.1, 39.9, 33.2, 32.6, 27.4, 26.3, 22.0, 21.8, 13.9, 13.8 ppm; IR (neat):  $\nu_{\text{max}}$  3055, 2928, 1710, 1610, 1515, 1454, 735  $\text{cm}^{-1}$ ; HRMS (ESI) calcd for  $\text{C}_{25}\text{H}_{30}\text{NO}_4$   $[\text{M}+\text{H}]^+$  408.2169, found 408.2169.

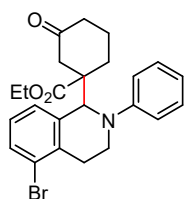

**Ethyl 1-(5-bromo-2-phenyl-1,2,3,4-tetrahydroisoquinolin-1-yl)-3-oxocyclohexane-1-carboxylate (3t):** Following the Ir-catalyzed procedure. Light yellow oil (67%, 61.1 mg, 1:1 dr);  $R_f = 0.3$  (EtOAc/petroleum ether = 1:5);  $^1\text{H NMR}$  (400 MHz,  $\text{CDCl}_3$ ):  $\delta = 7.51\text{--}6.78$  (m, 8H), 5.34 (s, 0.4H), 4.99 (s, 0.5H), 4.18–3.66 (m, 4H), 3.12–2.63 (m, 3H), 2.45–2.29 (m, 2H), 2.20–1.84 (m, 4H), 1.61–1.49 (m, 1H), 1.18 (t,  $J = 7.2$  Hz, 1.5H), 1.04 (t,  $J = 7.2$  Hz, 1.6H);  $^{13}\text{C NMR}$  (100 MHz,  $\text{CDCl}_3$ ):  $\delta = 208.7$ , 208.4, 175.2, 173.5, 150.5, 136.8, 136.1, 135.4, 134.9, 131.8, 131.3, 129.3, 129.1, 127.1, 126.8, 126.1, 125.6, 119.7, 118.9, 117.3, 115.7, 65.4, 64.0, 61.6, 61.2, 58.2, 57.7, 47.5, 46.5, 43.7, 40.0, 39.8, 33.4, 32.7, 27.1, 26.4, 21.9, 21.5, 13.8 ppm; IR (neat):  $\nu_{\text{max}}$  3060, 2923, 1715, 1610, 1505, 1451, 733  $\text{cm}^{-1}$ ; HRMS (ESI) calcd for  $\text{C}_{24}\text{H}_{27}\text{BrNO}_3$   $[\text{M}+\text{H}]^+$  456.1169, found 456.1182.

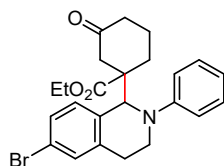

**Ethyl 1-(6-bromo-2-phenyl-1,2,3,4-tetrahydroisoquinolin-1-yl)-3-oxocyclohexane-1-**

**carboxylate (3u):** Following the Ir-catalyzed procedure. Light yellow oil (62%, 56.5 mg, 1:1 dr);  $R_f = 0.3$  (EtOAc/petroleum ether = 1:5);  $^1\text{H NMR}$  (400 MHz,  $\text{CDCl}_3$ ):  $\delta = 7.33\text{-}6.80$  (m, 8H), 5.33 (s, 0.4H), 5.00 (s, 0.4H), 4.17-3.53 (m, 4H), 3.13-2.60 (m, 3H), 2.36-1.83 (m, 6H), 1.58-1.48 (m, 1H), 1.18 (t,  $J = 7.2$  Hz, 1.5H), 1.02 (t,  $J = 7.2$  Hz, 1.6H);  $^{13}\text{C NMR}$  (100 MHz,  $\text{CDCl}_3$ ):  $\delta = 208.7, 208.5, 175.0, 173.6, 150.9, 150.8, 138.3, 137.7, 133.3, 132.7, 132.1, 131.7, 129.6, 129.3, 129.1, 128.8, 121.4, 121.0, 120.0, 119.1, 117.9, 116.1, 64.8, 63.5, 61.5, 61.1, 58.3, 47.0, 46.1, 44.6, 44.3, 40.0, 39.8, 33.1, 32.8, 26.6, 25.7, 21.9, 21.6, 13.9, 13.8$  ppm; IR (neat):  $\nu_{\text{max}}$  3064, 2918, 1718, 1610, 1512, 1450, 734  $\text{cm}^{-1}$ ; HRMS (ESI) calcd for  $\text{C}_{24}\text{H}_{27}\text{BrNO}_3$   $[\text{M}+\text{H}]^+$  456.1169, found 456.1168.

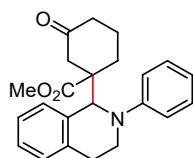

**Methyl 3-oxo-1-(2-phenyl-1,2,3,4-tetrahydroisoquinolin-1-yl)cyclohexane-1-carboxylate (4a):**

Following the Pd-catalyzed procedure. Light yellow oil (71%, 51.5 mg, 1:1.2 dr);  $R_f = 0.4$  (EtOAc/petroleum ether = 1:5);  $^1\text{H NMR}$  (400 MHz,  $\text{CDCl}_3$ ):  $\delta = 7.25\text{-}6.79$  (m, 9H), 5.43 (s, 0.3H), 5.08 (s, 0.6H), 3.85-3.75 (m, 1H), 3.63 (s, 1H), 3.60-3.49 (m, 1H), 3.42 (s, 2H), 3.16-2.59 (m, 3H), 2.43-2.25 (m, 2H), 2.17-1.83 (m, 4H), 1.59-1.48 (m, 1H);  $^{13}\text{C NMR}$  (100 MHz,  $\text{CDCl}_3$ ):  $\delta = 209.1, 209.0, 175.6, 174.3, 151.1, 136.0, 135.4, 133.5, 129.3, 129.0, 128.9, 128.2, 127.7, 127.4, 127.2, 126.1, 125.7, 119.8, 118.8, 118.1, 116.0, 65.3, 63.7, 59.2, 58.8, 52.2, 51.8, 46.9, 46.0, 45.3, 45.1, 40.1, 39.9, 33.0, 32.5, 27.1, 26.2, 22.0, 21.8$  ppm; IR (neat):  $\nu_{\text{max}}$  3058, 2950, 1726, 1597, 1498, 1451, 755  $\text{cm}^{-1}$ ; HRMS (ESI) calcd for  $\text{C}_{23}\text{H}_{26}\text{NO}_3$   $[\text{M}+\text{H}]^+$  364.1907, found 364.1913.

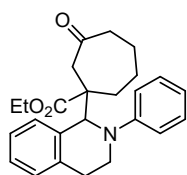

**Ethyl 3-oxo-1-(2-phenyl-1,2,3,4-tetrahydroisoquinolin-1-yl)cycloheptane-1-carboxylate (4b):**

Following the Pd-catalyzed procedure. Light yellow oil (40%, 31.3 mg, 1:1.1 dr);  $R_f = 0.4$  (EtOAc/petroleum ether = 1:5);  $^1\text{H NMR}$  (400 MHz,  $\text{CDCl}_3$ ):  $\delta = 7.22\text{-}6.76$  (m, 9H), 5.29 (s, 0.5H), 5.05 (s, 0.5H), 4.16-3.54 (m, 4H), 3.24-2.68 (m, 3H), 2.61-2.15 (m, 4H), 2.04-1.70 (m, 4H), 1.59-1.39 (m, 1H), 1.21 (t,  $J = 7.2$  Hz, 1.5H), 1.03 (t,  $J = 7.2$  Hz, 1.5H);  $^{13}\text{C NMR}$  (100 MHz,  $\text{CDCl}_3$ ):  $\delta = 211.9, 211.8, 175.1, 174.0, 151.1, 151.0, 135.7, 135.6, 134.4, 133.7, 129.4, 129.2, 129.1, 129.0,$

127.6, 127.5, 127.3, 127.2, 125.8, 125.6, 119.5, 118.8, 117.7, 116.2, 67.2, 66.0, 61.3, 60.9, 55.9, 55.7, 50.1, 50.0, 44.1, 43.9, 43.8, 40.4, 37.9, 27.5, 26.5, 26.2, 25.7, 23.6, 23.4, 13.8 ppm; IR (neat):  $\nu_{\max}$  3060, 2979, 1721, 1698, 1596, 1497, 1451, 754  $\text{cm}^{-1}$ ; HRMS (ESI) calcd for  $\text{C}_{25}\text{H}_{30}\text{NO}_3$   $[\text{M}+\text{H}]^+$  392.2220, found 392.2227.

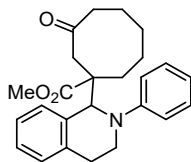

**Methyl 3-oxo-1-(2-phenyl-1,2,3,4-tetrahydroisoquinolin-1-yl)cyclooctane-1-carboxylate (4c):**

Following the Pd-catalyzed procedure. Light yellow oil (57%, 44.6 mg, 1:1 dr);  $R_f$  = 0.4 (EtOAc/petroleum ether = 1:5);  $^1\text{H}$  NMR (400 MHz,  $\text{CDCl}_3$ ):  $\delta$  = 7.17-6.68 (m, 9H), 5.37 (s, 0.5H), 4.96 (s, 0.4H), 3.86-3.12 (m, 5H), 3.05-2.80 (m, 4H), 2.42-1.94 (m, 4H), 1.76-1.52 (m, 3H), 1.50-1.34 (m, 2H), 1.25-1.23 (m, 1H);  $^{13}\text{C}$  NMR (100 MHz,  $\text{CDCl}_3$ ):  $\delta$  = 214.5, 214.2, 175.2, 174.0, 151.2, 150.9, 135.9, 135.2, 134.7, 134.4, 129.3, 129.1, 129.0, 128.7, 127.8, 127.3, 127.2, 125.8, 125.4, 119.2, 118.5, 117.2, 115.6, 66.1, 59.3, 59.1, 52.0, 51.4, 45.3, 44.7, 43.9, 43.7, 31.8, 30.6, 28.7, 28.4, 26.5, 26.4, 22.2 ppm; IR (neat):  $\nu_{\max}$  3059, 2939, 1729, 1597, 1498, 1467, 755  $\text{cm}^{-1}$ ; HRMS (ESI) calcd for  $\text{C}_{25}\text{H}_{30}\text{NO}_3$   $[\text{M}+\text{H}]^+$  392.2220, found 392.2216.

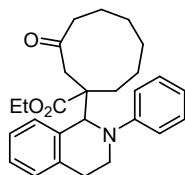

**Ethyl 3-oxo-1-(2-phenyl-1,2,3,4-tetrahydroisoquinolin-1-yl)cyclononane-1-carboxylate (4d):**

Following the Pd-catalyzed procedure. Light yellow oil (41%, 34.4 mg, 1:1.2 dr);  $R_f$  = 0.4 (EtOAc/petroleum ether = 1:5);  $^1\text{H}$  NMR (400 MHz,  $\text{CDCl}_3$ ):  $\delta$  = 7.14-6.65 (m, 9H), 5.40 (s, 0.5H), 5.09 (s, 0.5H), 4.01-3.51 (m, 4H), 3.13-2.61 (m, 5H), 2.38-2.29 (m, 2H), 1.91-1.62 (m, 4H), 1.45-1.27 (m, 5H), 1.01 (t,  $J$  = 7.2 Hz, 1.5H), 0.89 (t,  $J$  = 7.2 Hz, 1.5H);  $^{13}\text{C}$  NMR (100 MHz,  $\text{CDCl}_3$ ):  $\delta$  = 214.3, 213.8, 175.4, 175.3, 151.0, 150.9, 135.4, 135.3, 135.1, 134.7, 129.2, 129.1, 129.0, 128.8, 128.4, 128.1, 127.0, 125.4, 125.0, 118.5, 118.1, 116.3, 115.5, 63.7, 63.4, 60.8, 60.7, 56.6, 56.4, 46.4, 44.3, 43.4, 42.7, 42.3, 29.5, 28.7, 27.2, 25.8, 25.4, 22.2, 22.1, 21.5, 19.7, 19.0, 13.7, 13.6 ppm; IR (neat):  $\nu_{\max}$  3059, 2928, 1718, 1597, 1498, 1451, 754  $\text{cm}^{-1}$ ; HRMS (ESI) calcd for  $\text{C}_{27}\text{H}_{34}\text{NO}_3$   $[\text{M}+\text{H}]^+$  420.2533, found 420.2539.

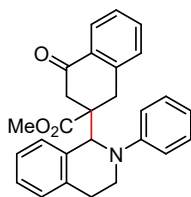

**Methyl 4-oxo-2-(2-phenyl-1,2,3,4-tetrahydroisoquinolin-1-yl)-1,2,3,4-tetrahydronaphthalene-2-carboxylate (4e):** Following the Ir-catalyzed procedure. Light yellow oil (41%, 33.7 mg, 1:1 dr);  $R_f = 0.4$  (EtOAc/petroleum ether = 1:5);  $^1\text{H NMR}$  (400 MHz,  $\text{CDCl}_3$ ):  $\delta = 7.94\text{-}6.79$  (m, 13H), 5.41 (s, 0.5H), 5.16 (s, 0.5H), 3.93-3.73 (m, 2H), 3.60-3.28 (m, 6H), 3.06-2.38 (m, 3H);  $^{13}\text{C NMR}$  (100 MHz,  $\text{CDCl}_3$ ):  $\delta = 196.0, 195.9, 175.0, 174.0, 150.9, 150.8, 141.1, 141.0, 135.8, 135.6, 133.9, 133.8, 133.5, 131.5, 131.4, 129.4, 129.3, 129.2, 129.1, 129.0, 128.8, 128.2, 127.7, 127.6, 127.5, 127.1, 127.0, 126.9, 126.7, 126.1, 125.8, 119.5, 119.1, 117.3, 116.3, 64.9, 63.8, 57.8, 57.1, 52.2, 52.0, 45.5, 45.3, 44.8, 44.5, 37.9, 37.8, 27.1, 26.2$  ppm; IR (neat):  $\nu_{\text{max}}$  3059, 2931, 1713, 1607, 1453, 748  $\text{cm}^{-1}$ ; HRMS (ESI) calcd for  $\text{C}_{27}\text{H}_{26}\text{NO}_3$   $[\text{M}+\text{H}]^+$  412.1907, found 412.1903.

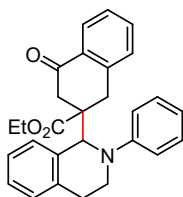

**Ethyl 4-oxo-2-(2-phenyl-1,2,3,4-tetrahydroisoquinolin-1-yl)-1,2,3,4-tetrahydronaphthalene-2-carboxylate (4f):** Following the Ir-catalyzed procedure. Light yellow oil (45%, 38.3 mg, 1:1 dr);  $R_f = 0.4$  (EtOAc/petroleum ether = 1:5);  $^1\text{H NMR}$  (400 MHz,  $\text{CDCl}_3$ ):  $\delta = 7.94\text{-}6.77$  (m, 13H), 5.42 (s, 0.5H), 5.15 (s, 0.5H), 3.94-3.60 (m, 4H), 3.48-3.30 (m, 3H), 3.04-3.00 (m, 1H), 2.82-2.40 (dd,  $J = 16.4, 16.8$  Hz, 2H), 0.87 (t,  $J = 7.2$  Hz, 1.5H), 0.82 (t,  $J = 7.2$  Hz, 1.2H);  $^{13}\text{C NMR}$  (100 MHz,  $\text{CDCl}_3$ ):  $\delta = 196.1, 196.0, 174.6, 173.5, 150.9, 150.7, 141.0, 135.7, 135.5, 133.9, 133.8, 133.6, 131.7, 131.5, 129.3, 129.1, 129.0, 128.9, 128.2, 127.5, 127.0, 126.6, 126.1, 125.8, 119.3, 118.9, 117.0, 116.0, 64.8, 63.6, 61.3, 61.0, 57.4, 56.9, 45.7, 44.9, 44.5, 44.4, 38.2, 38.1, 26.9, 26.1, 13.6, 13.5$  ppm; IR (neat):  $\nu_{\text{max}}$  3062, 2979, 1720, 1683, 1597, 1497, 1454, 756  $\text{cm}^{-1}$ ; HRMS (ESI) calcd for  $\text{C}_{28}\text{H}_{28}\text{NO}_3$   $[\text{M}+\text{H}]^+$  426.2064, found 426.2068.

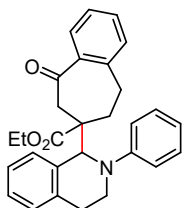



**Ethyl 5-oxo-7-(2-phenyl-1,2,3,4-tetrahydroisoquinolin-1-yl)-6,7,8,9-tetrahydro-5H-benzo[7]annulene-7-carboxylate (4g):** Following the Ir-catalyzed procedure. Light yellow oil (47%, 41.3 mg, 1:1 dr);  $R_f = 0.4$  (EtOAc/petroleum ether = 1:5);  $^1\text{H NMR}$  (400 MHz,  $\text{CDCl}_3$ ):  $\delta = 7.72\text{-}6.72$  (m, 13H), 5.13 (s, 0.4H), 5.11 (s, 0.4H), 3.81-3.62 (m, 3H), 3.52-3.44 (m, 1H), 3.32-3.17 (m, 1H), 3.07-2.98 (m, 2H), 2.91-2.72 (m, 3H), 2.14-1.91 (m, 2H), 0.91-0.84 (tt,  $J = 7.2$  Hz, 3H);  $^{13}\text{C NMR}$  (100 MHz,  $\text{CDCl}_3$ ):  $\delta = 202.0, 201.7, 174.7, 173.7, 150.4, 142.1, 141.2, 138.1, 137.2, 135.7, 135.4, 134.6, 134.3, 132.8, 132.3, 129.2, 129.0, 128.6, 128.5, 128.2, 127.3, 126.6, 125.8, 125.6, 118.9, 118.4, 116.5, 115.4, 66.8, 64.2, 61.1, 60.9, 54.3, 54.1, 50.4, 48.0, 43.0, 42.8, 34.0, 31.9, 31.6, 31.4, 25.9, 25.6, 13.5$  ppm; IR (neat):  $\nu_{\text{max}}$  3062, 2979, 1720, 1683, 1597, 1497, 1454, 756  $\text{cm}^{-1}$ ; HRMS (ESI) calcd for  $\text{C}_{29}\text{H}_{30}\text{NO}_3$   $[\text{M}+\text{H}]^+$  440.2220, found 440.2214.

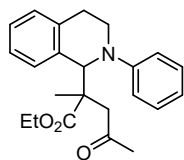

**Ethyl 2-methyl-4-oxo-2-(2-phenyl-1,2,3,4-tetrahydroisoquinolin-1-yl)pentanoate (4h):** Following the Pd-catalyzed procedure. Light yellow oil (46%, 33.6 mg, 1:1.1 dr);  $R_f = 0.4$  (EtOAc/petroleum ether = 1:5);  $^1\text{H NMR}$  (400 MHz,  $\text{CDCl}_3$ ):  $\delta = 7.23\text{-}6.72$  (m, 9H), 5.24 (s, 0.5H), 5.00 (s, 0.5H), 4.15-3.56 (m, 4H), 3.26-2.67 (m, 4H), 2.10-2.03 (m, 3H), 1.33-1.28 (m, 3H), 1.20 (t,  $J = 7.2$  Hz, 1.5H), 1.01 (t,  $J = 7.2$  Hz, 1.5H);  $^{13}\text{C NMR}$  (100 MHz,  $\text{CDCl}_3$ ):  $\delta = 206.3, 205.8, 176.3, 174.8, 150.6, 150.5, 135.6, 135.3, 134.7, 134.5, 129.2, 129.1, 129.0, 128.8, 127.9, 127.8, 127.3, 127.1, 125.6, 125.4, 118.5, 118.4, 116.1, 115.6, 65.2, 63.9, 60.9, 60.6, 51.9, 51.8, 51.3, 50.9, 43.7, 43.4, 30.8, 26.1, 25.9, 20.9, 20.3, 13.9, 13.7$  ppm; IR (neat):  $\nu_{\text{max}}$  3060, 2983, 1717, 1597, 1498, 1453, 754  $\text{cm}^{-1}$ ; HRMS (ESI) calcd for  $\text{C}_{23}\text{H}_{28}\text{NO}_3$   $[\text{M}+\text{H}]^+$  366.2064, found 366.2057.

## 7 References

- 1 L. Chen, L.-N. Guo, S. Liu, L. Liu and X.-H. Duan, Visible-Light-Driven Palladium-Catalyzed Dowd-Beckwith Ring Expansion/C-C Bond Formation Cascade, *Chem. Sci.* 2021, **12**, 1791-1795.
- 2 W.-J. Zhou , G.-M. Cao, G. Shen, X.-Y. Zhu, Y.-Y. Gui, J.-H. Ye, L. Sun, L.-L. Liao, J. Li and D.-G. Yu, Visible-Light-Driven Palladium-Catalyzed Radical Alkylation of C-H Bonds with Unactivated Alkyl Bromides, *Angew. Chem., Int. Ed.*, 2017, **56**, 15683-15687.
- 3 J. F. Franz, W. B. Kraus and K. Zeitler, No Photocatalyst Required–Versatile, Visible Light Mediated Transformations with Polyhalomethanes. *Chem. Commun.*, 2015, **51**, 8280-8283.

# 8 <sup>1</sup>H NMR and <sup>13</sup>C NMR spectra of products 3 and 4

<sup>1</sup>H NMR (400 MHz, CDCl<sub>3</sub>) and <sup>13</sup>C NMR (100 MHz, CDCl<sub>3</sub>) spectra of **3a**

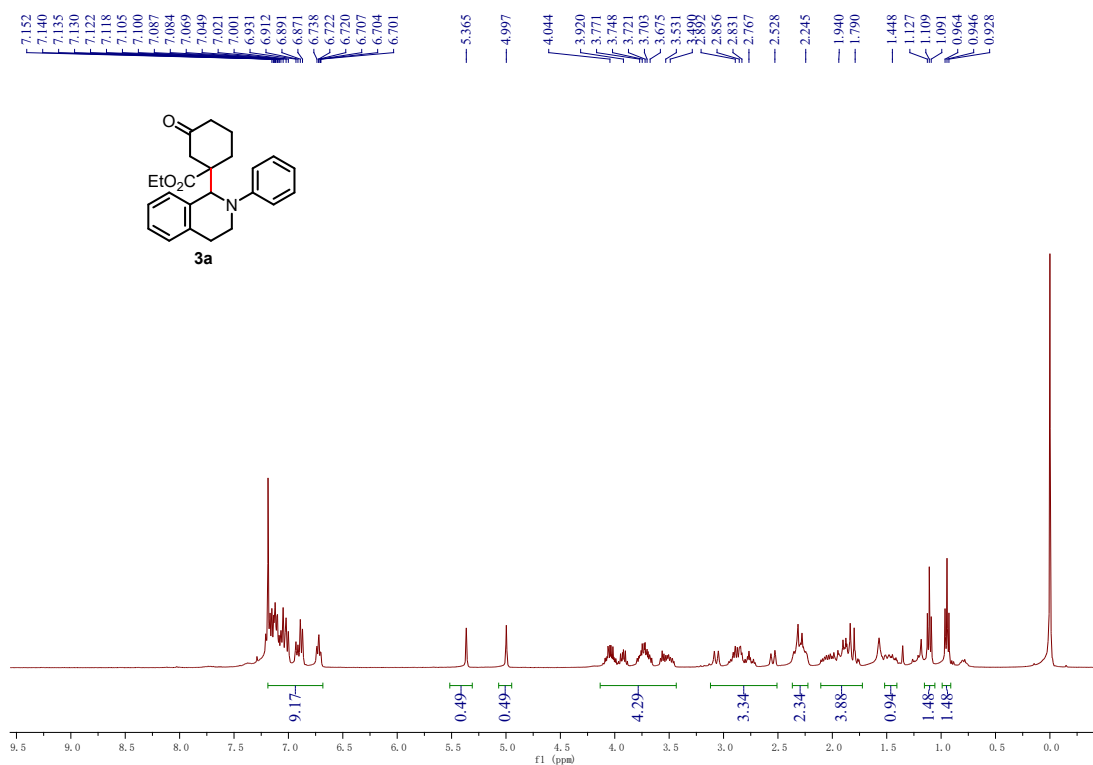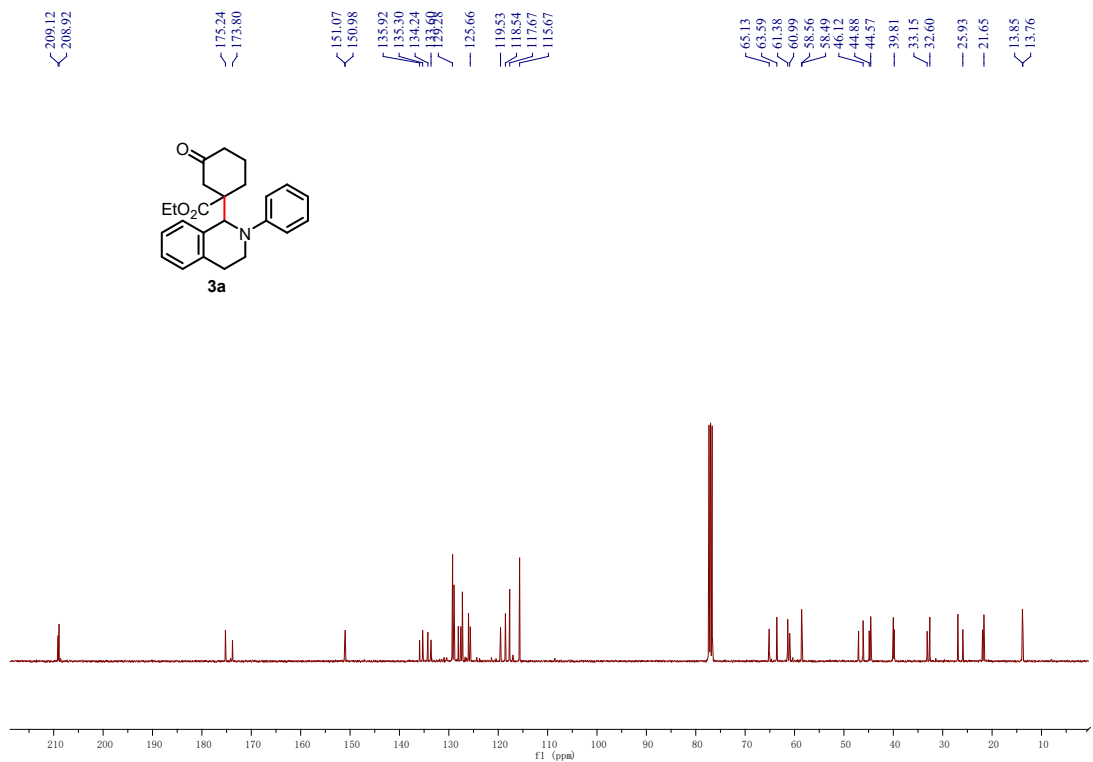

$^1\text{H}$  NMR (400 MHz,  $\text{CDCl}_3$ ) and  $^{13}\text{C}$  NMR (100 MHz,  $\text{CDCl}_3$ ) spectra of **3b**

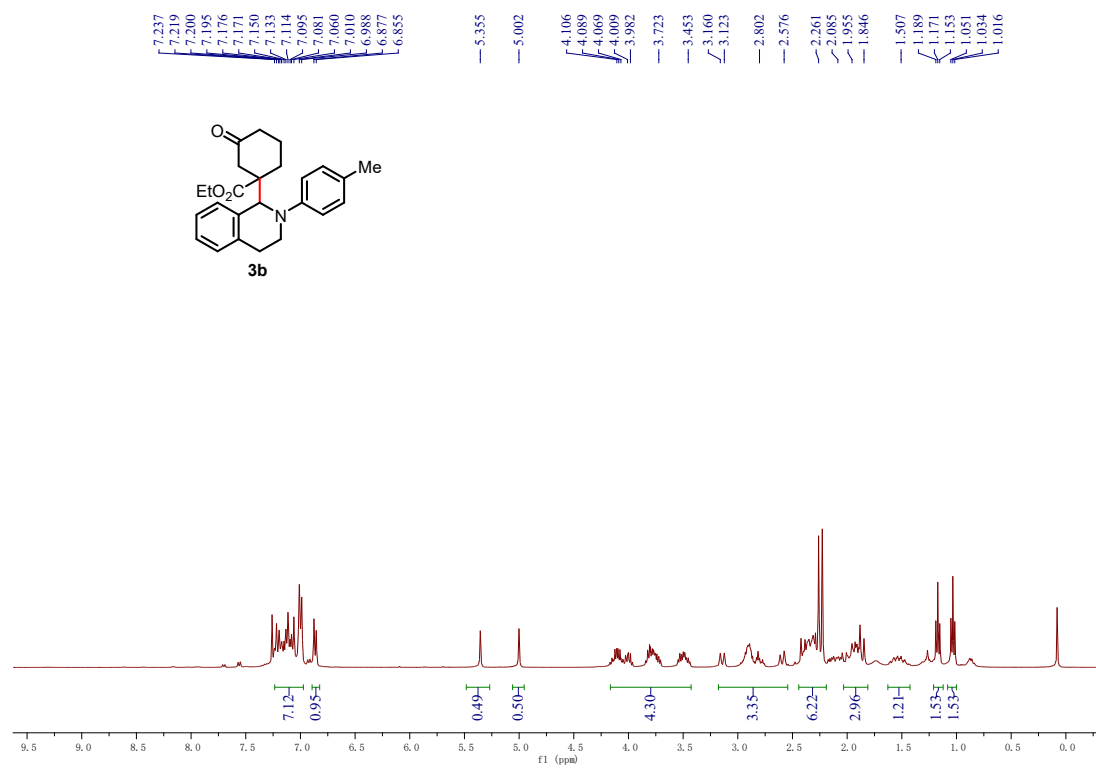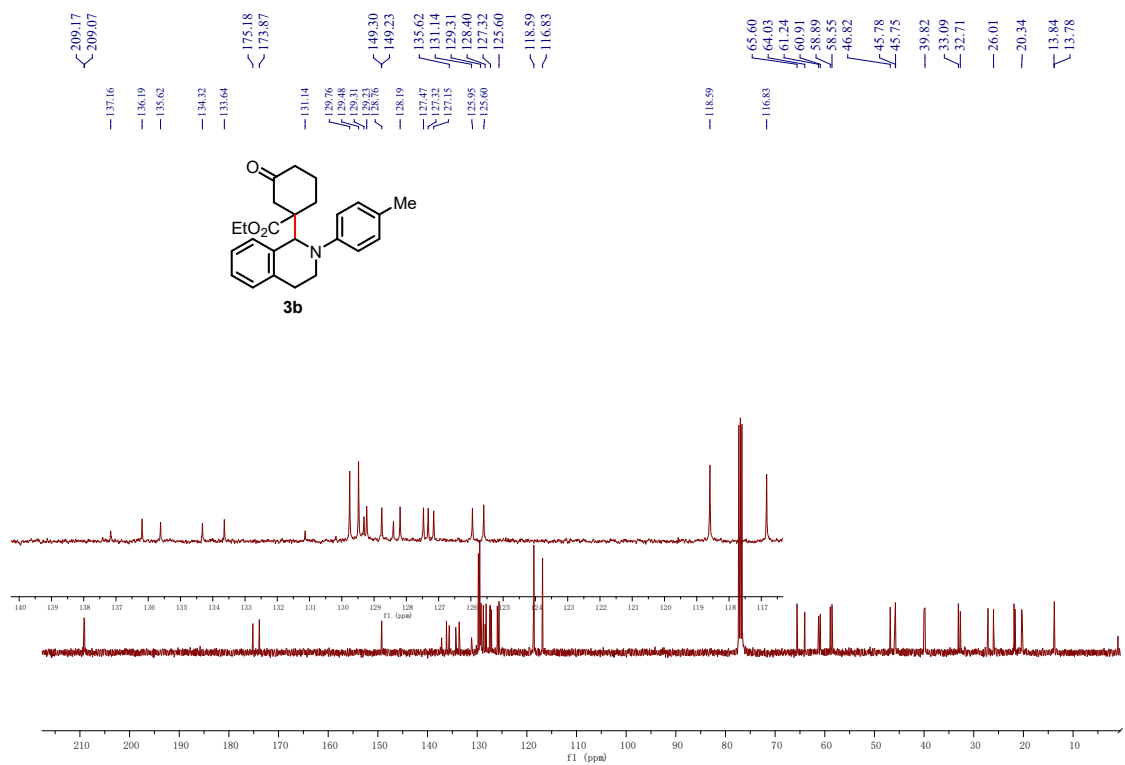

$^1\text{H}$  NMR (400 MHz,  $\text{CDCl}_3$ ) and  $^{13}\text{C}$  NMR (100 MHz,  $\text{CDCl}_3$ ) spectra of **3c**

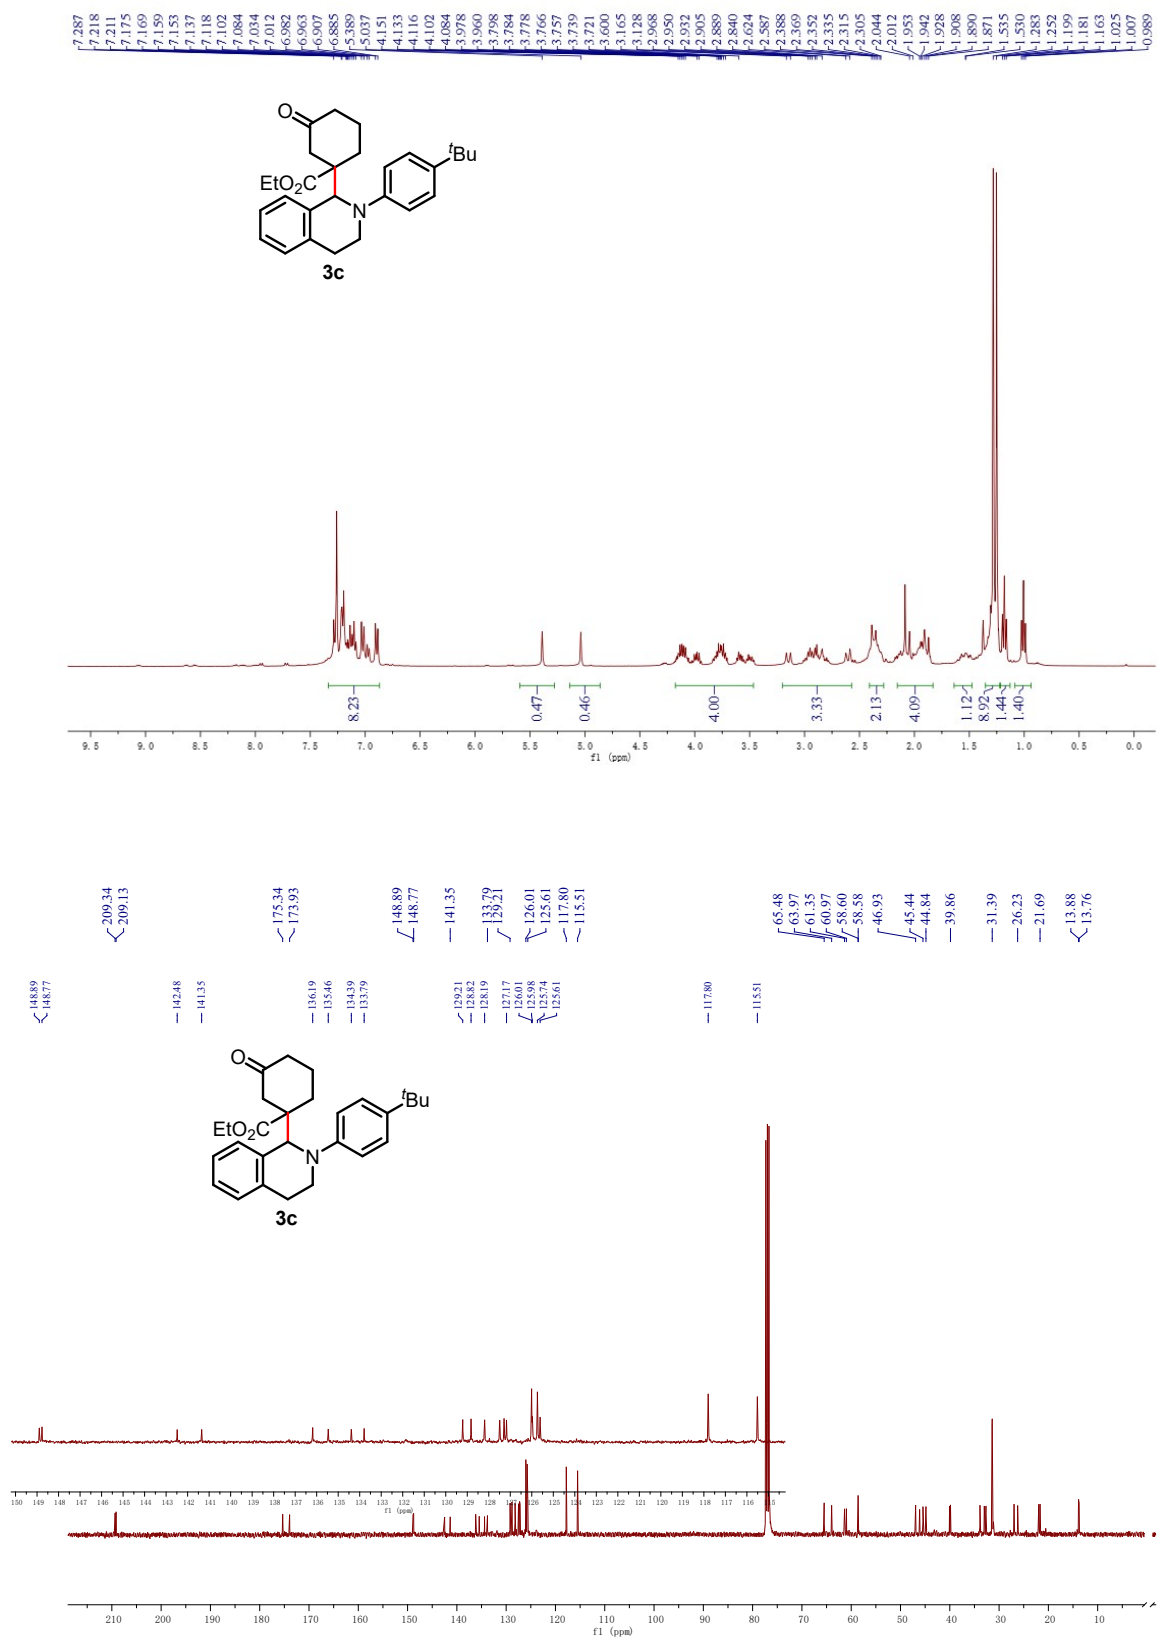

$^1\text{H}$  NMR (400 MHz,  $\text{CDCl}_3$ ) and  $^{13}\text{C}$  NMR (100 MHz,  $\text{CDCl}_3$ ) spectra of **3d**

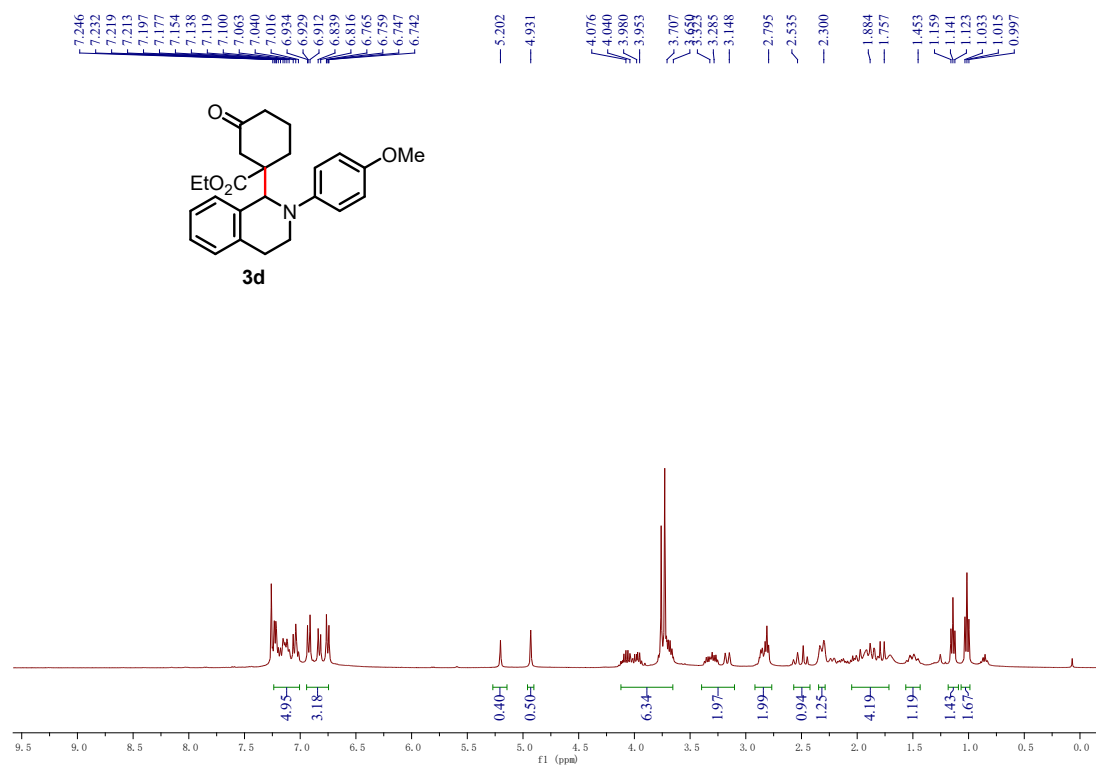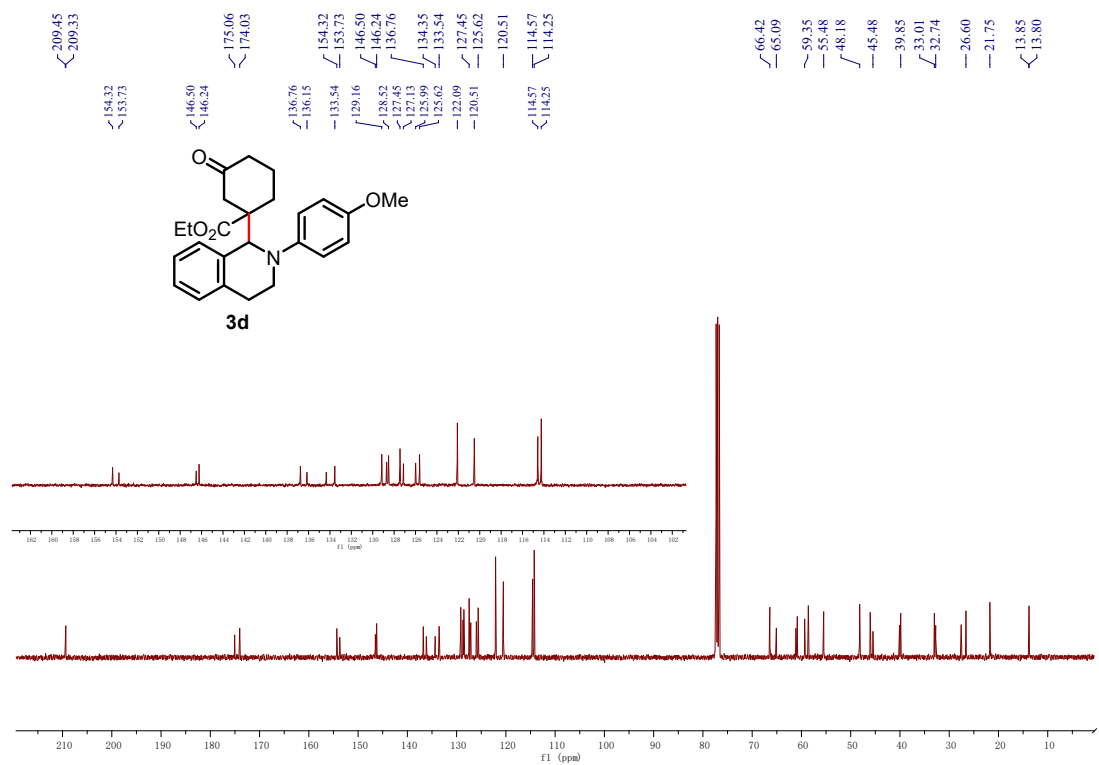

$^1\text{H}$  NMR (400 MHz,  $\text{CDCl}_3$ ) and  $^{13}\text{C}$  NMR (100 MHz,  $\text{CDCl}_3$ ) spectra of **3e**

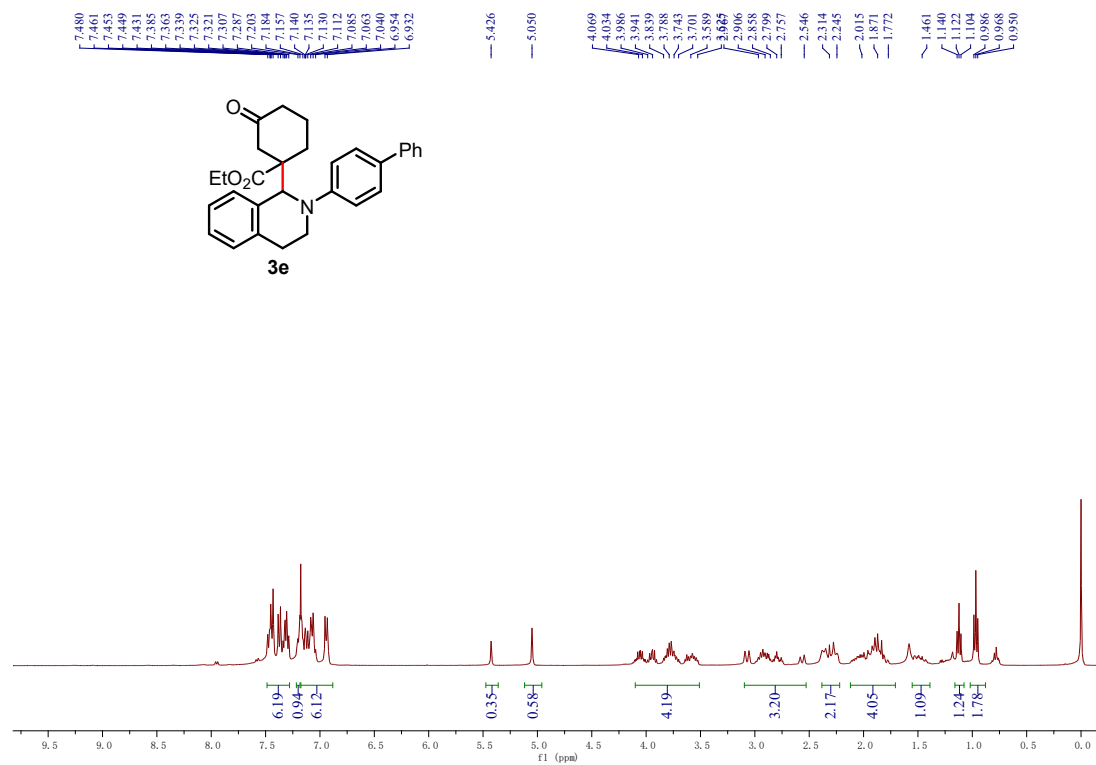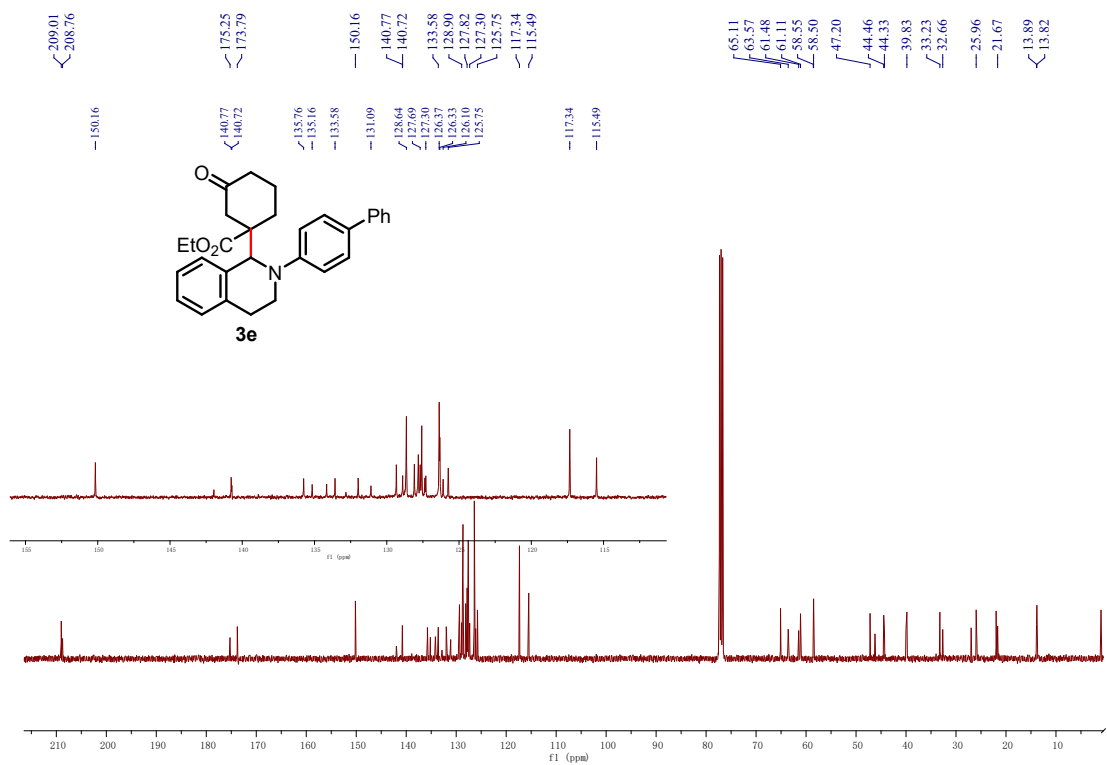

$^1\text{H}$  NMR (400 MHz,  $\text{CDCl}_3$ ) and  $^{13}\text{C}$  NMR (100 MHz,  $\text{CDCl}_3$ ) spectra of **3f**

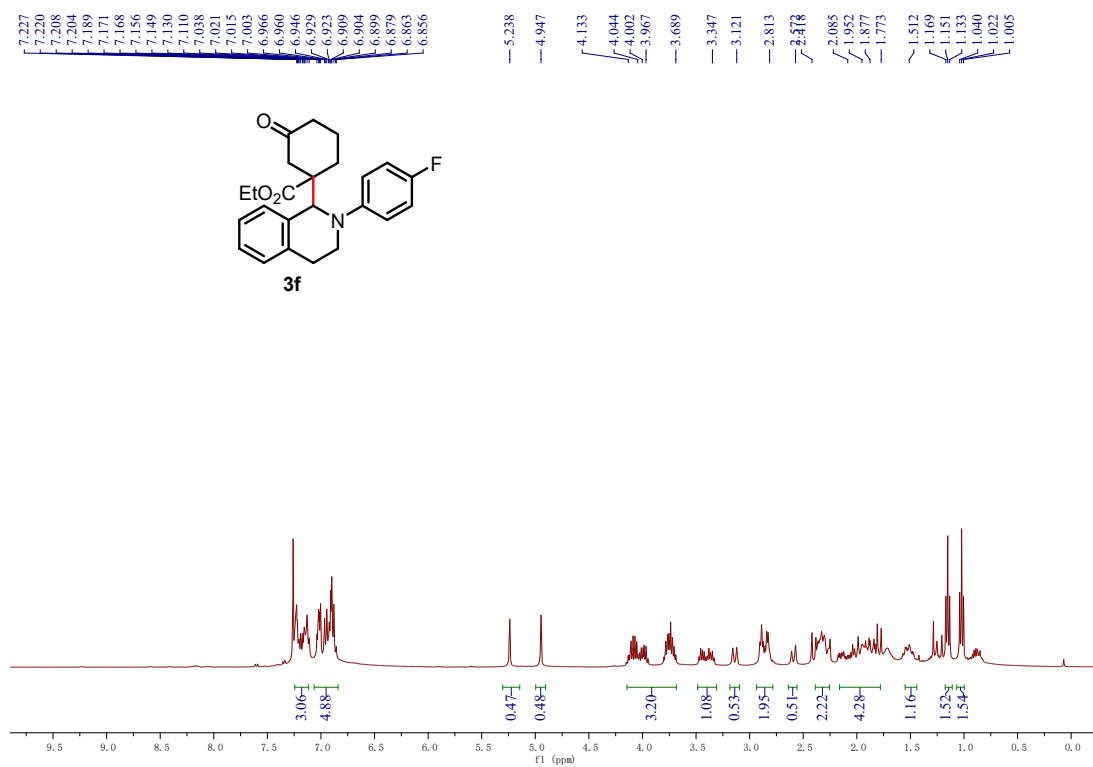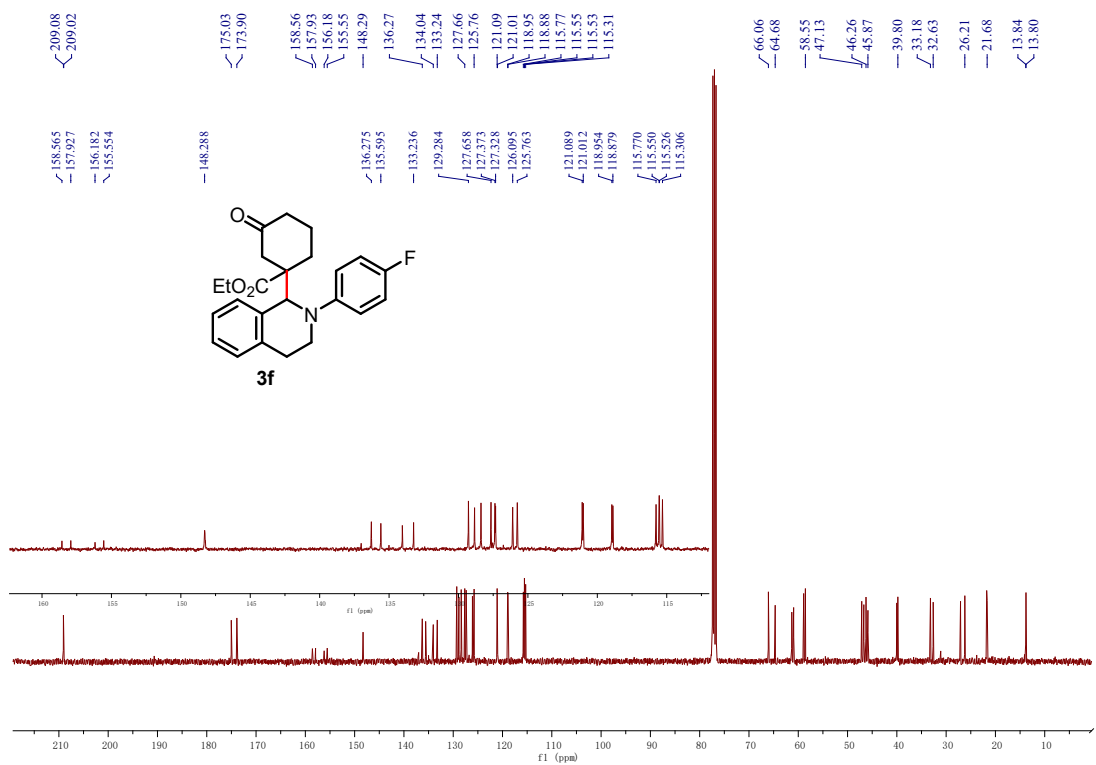



$^1\text{H}$  NMR (400 MHz,  $\text{CDCl}_3$ ) and  $^{13}\text{C}$  NMR (100 MHz,  $\text{CDCl}_3$ ) spectra of **3g**

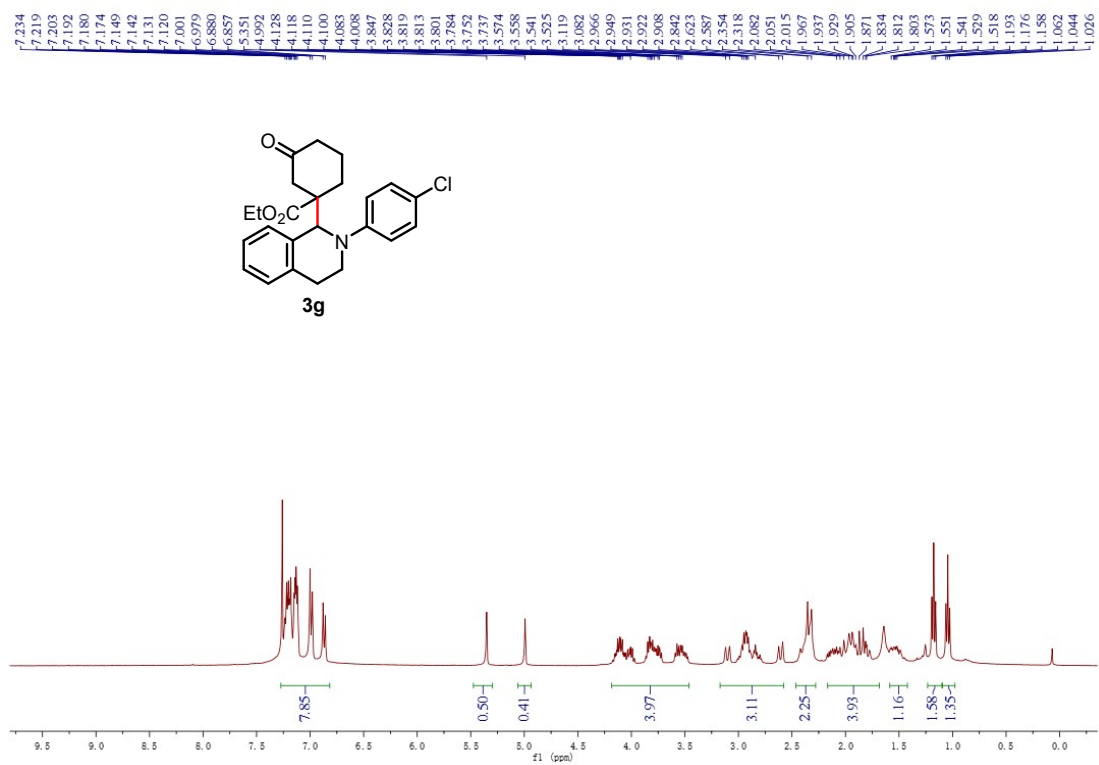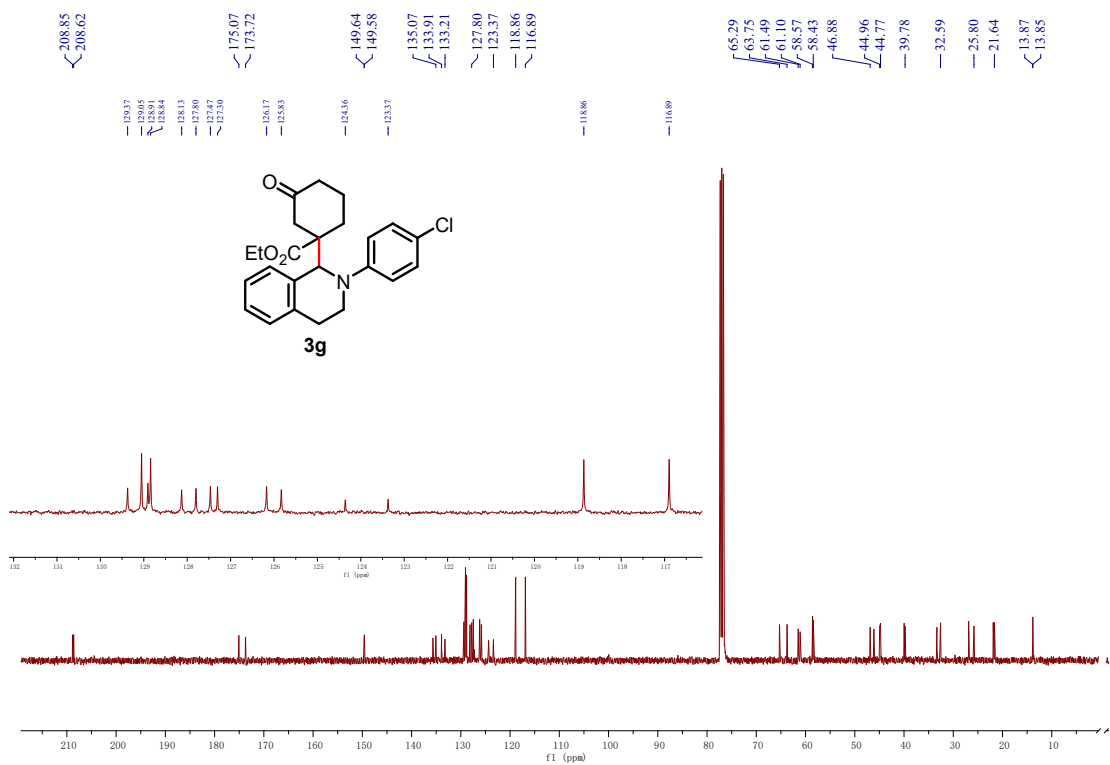

$^1\text{H}$  NMR (400 MHz,  $\text{CDCl}_3$ ) and  $^{13}\text{C}$  NMR (100 MHz,  $\text{CDCl}_3$ ) spectra of **3h**

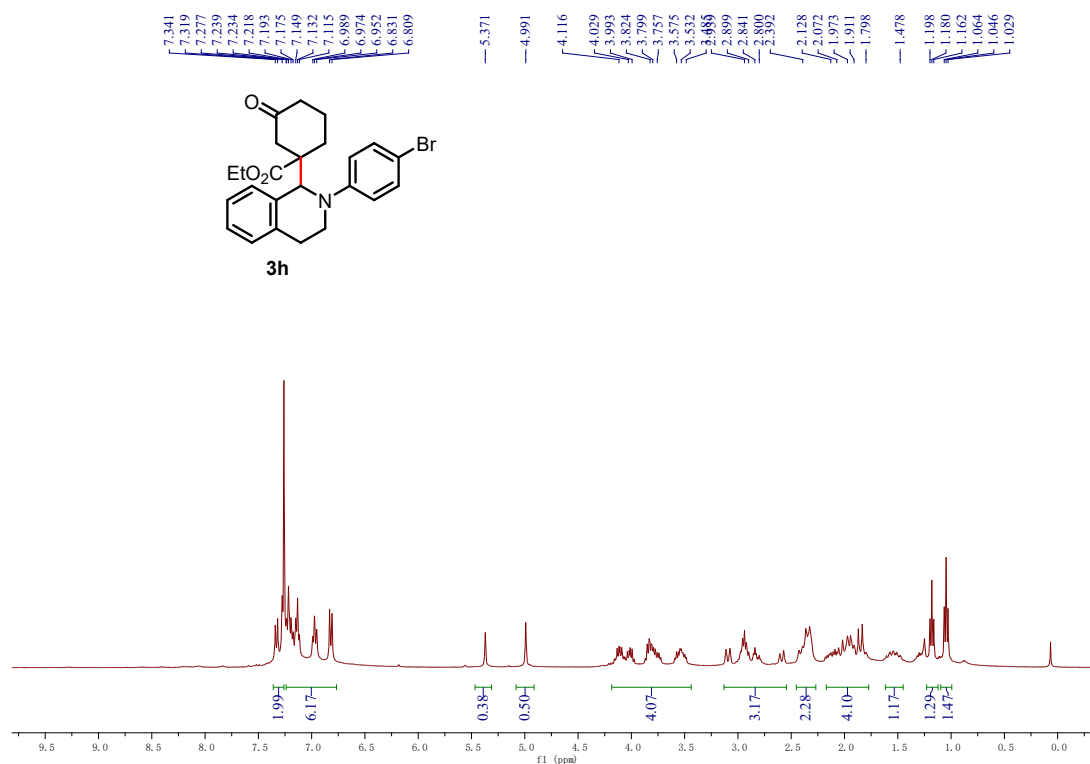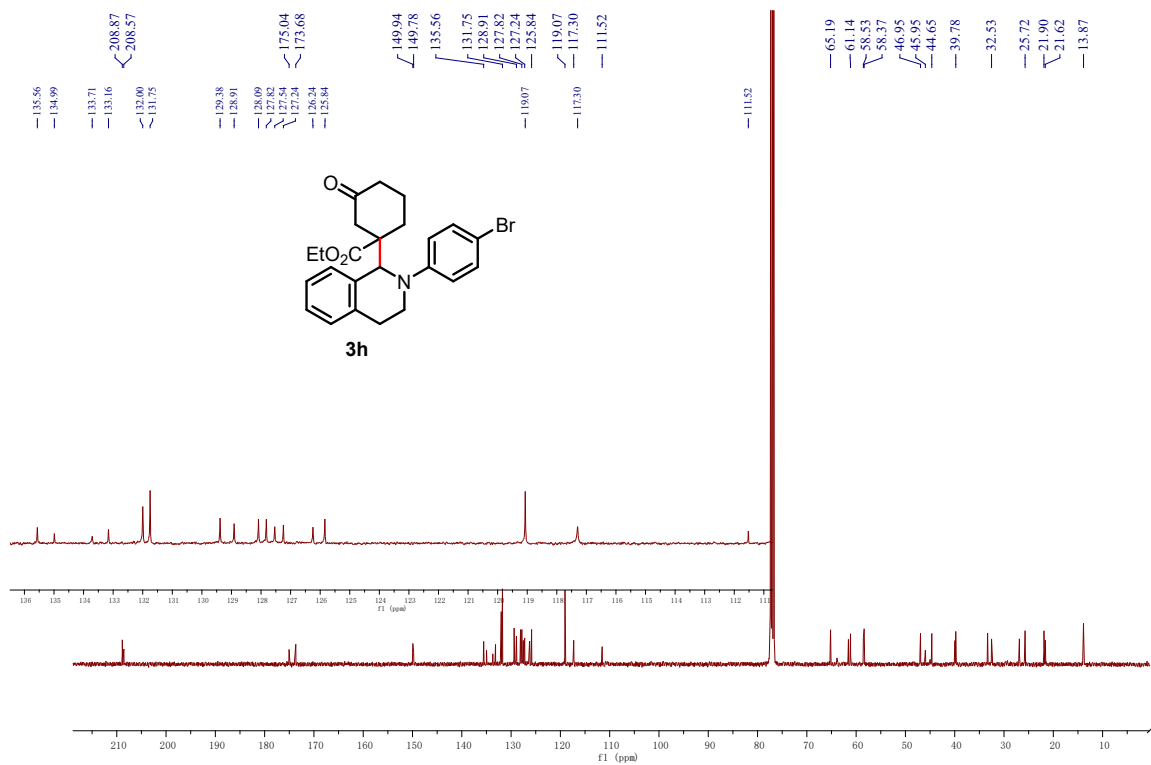

$^1\text{H}$  NMR (400 MHz,  $\text{CDCl}_3$ ) and  $^{13}\text{C}$  NMR (100 MHz,  $\text{CDCl}_3$ ) spectra of **3i**

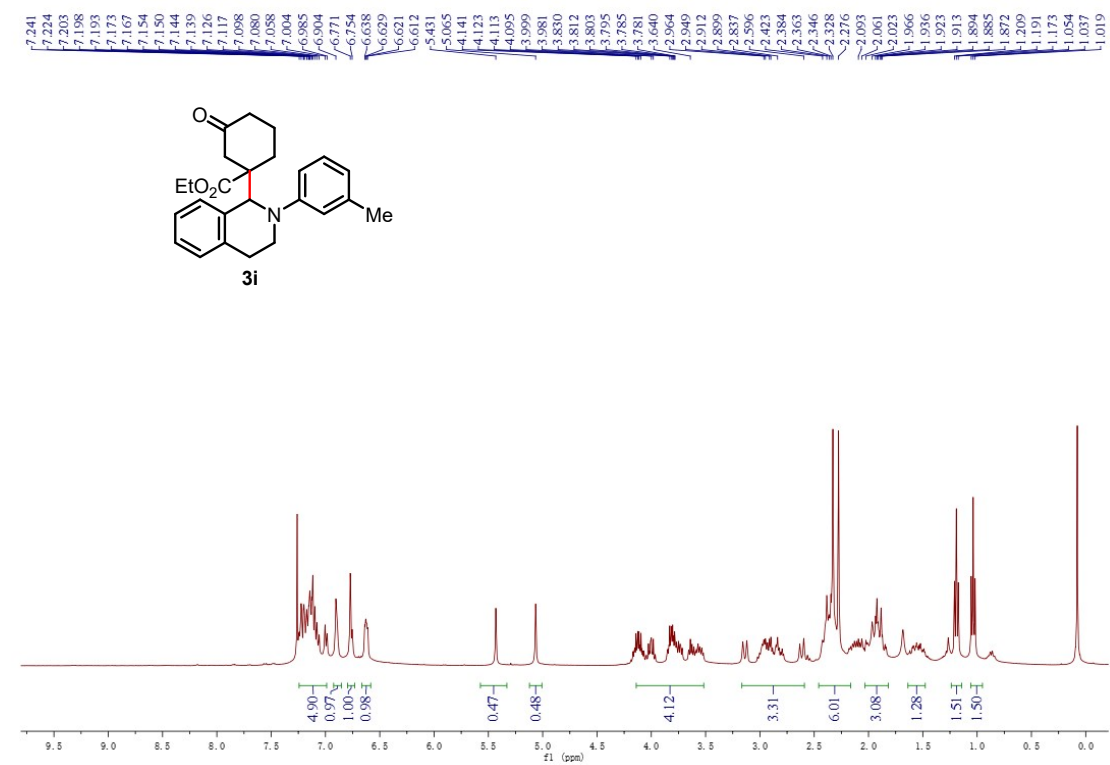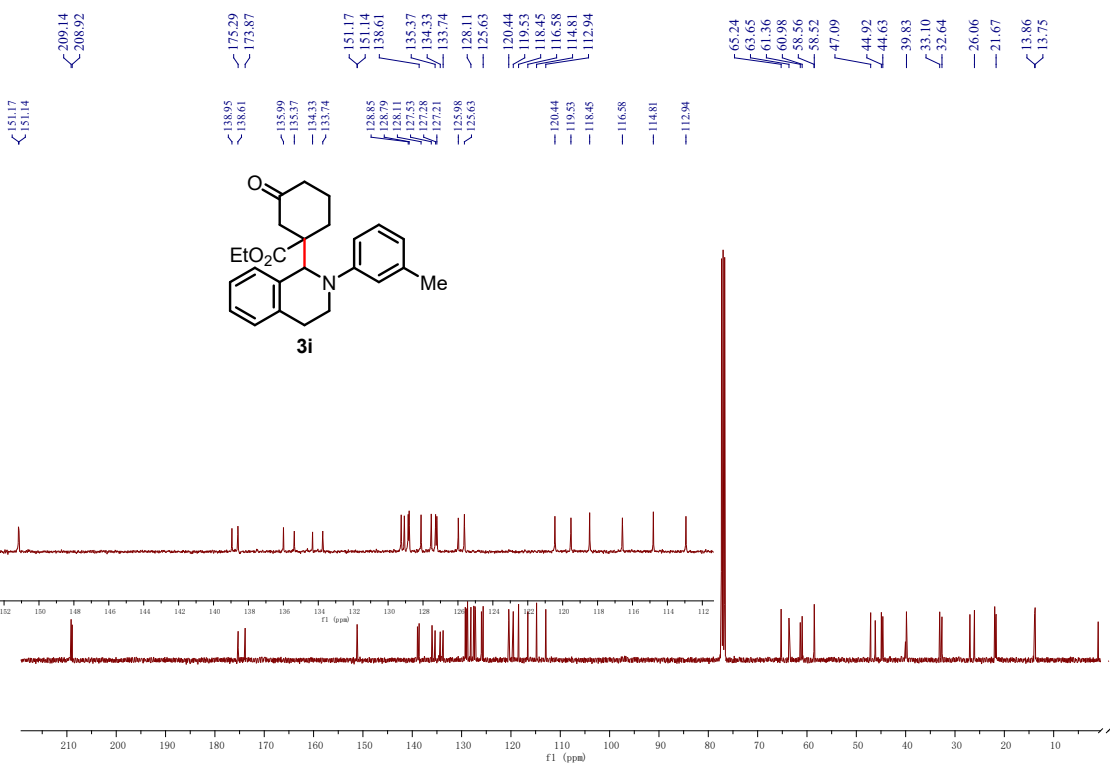

$^1\text{H}$  NMR (400 MHz,  $\text{CDCl}_3$ ) and  $^{13}\text{C}$  NMR (100 MHz,  $\text{CDCl}_3$ ) spectra of **3j**

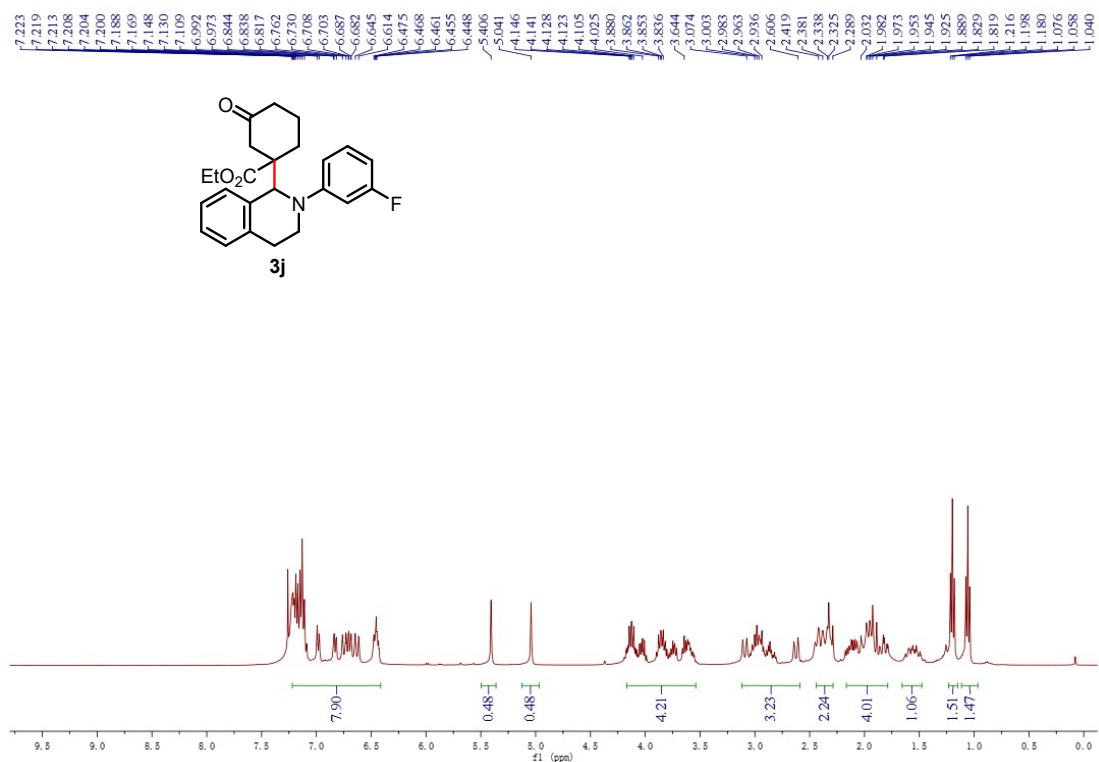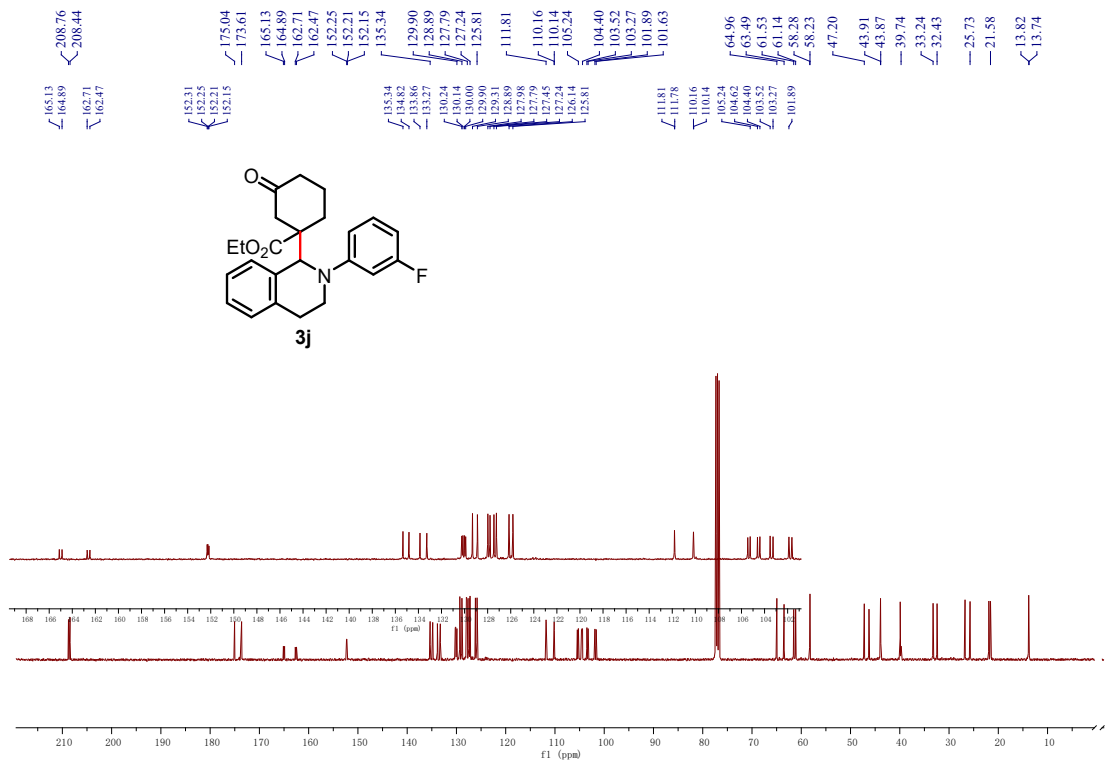

$^1\text{H}$  NMR (400 MHz,  $\text{CDCl}_3$ ) and  $^{13}\text{C}$  NMR (100 MHz,  $\text{CDCl}_3$ ) spectra of **3k**

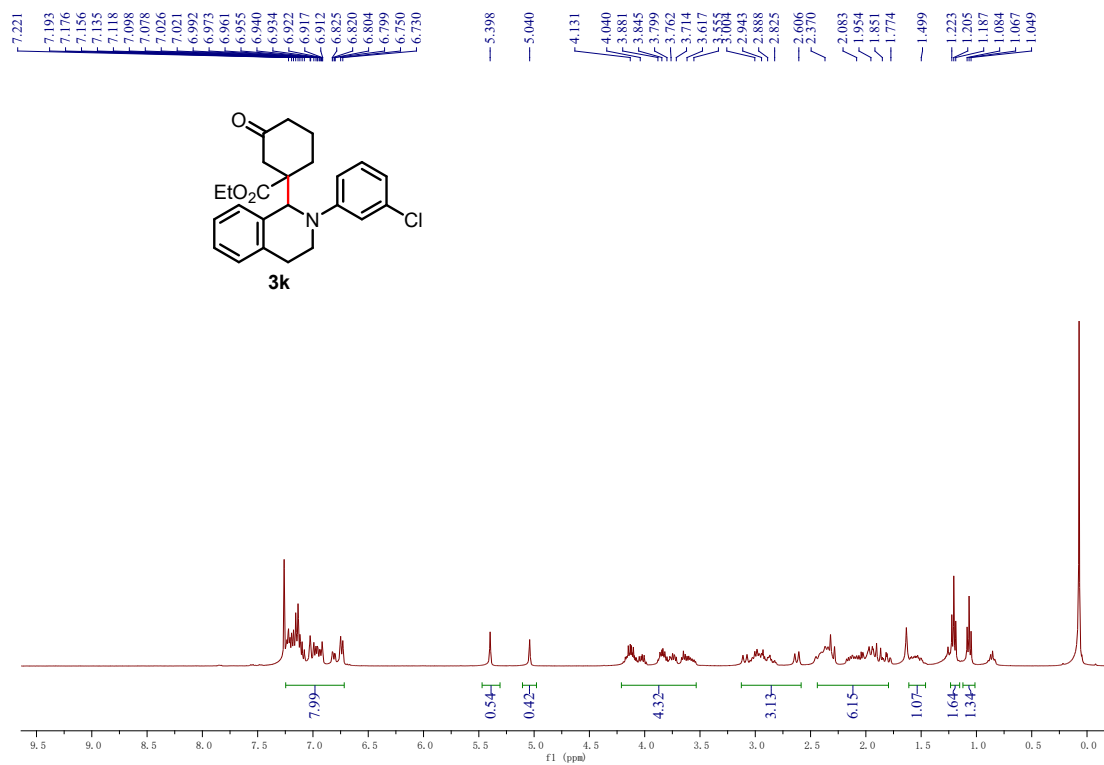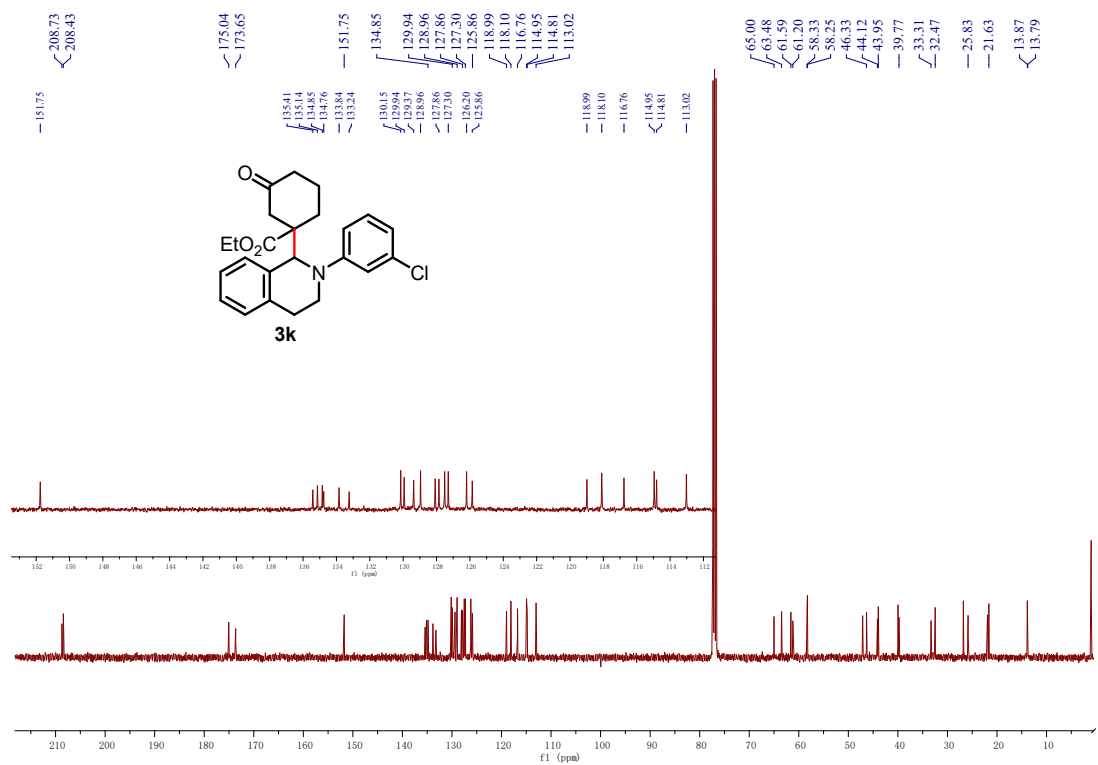

$^1\text{H}$  NMR (400 MHz,  $\text{CDCl}_3$ ) and  $^{13}\text{C}$  NMR (100 MHz,  $\text{CDCl}_3$ ) spectra of **31**

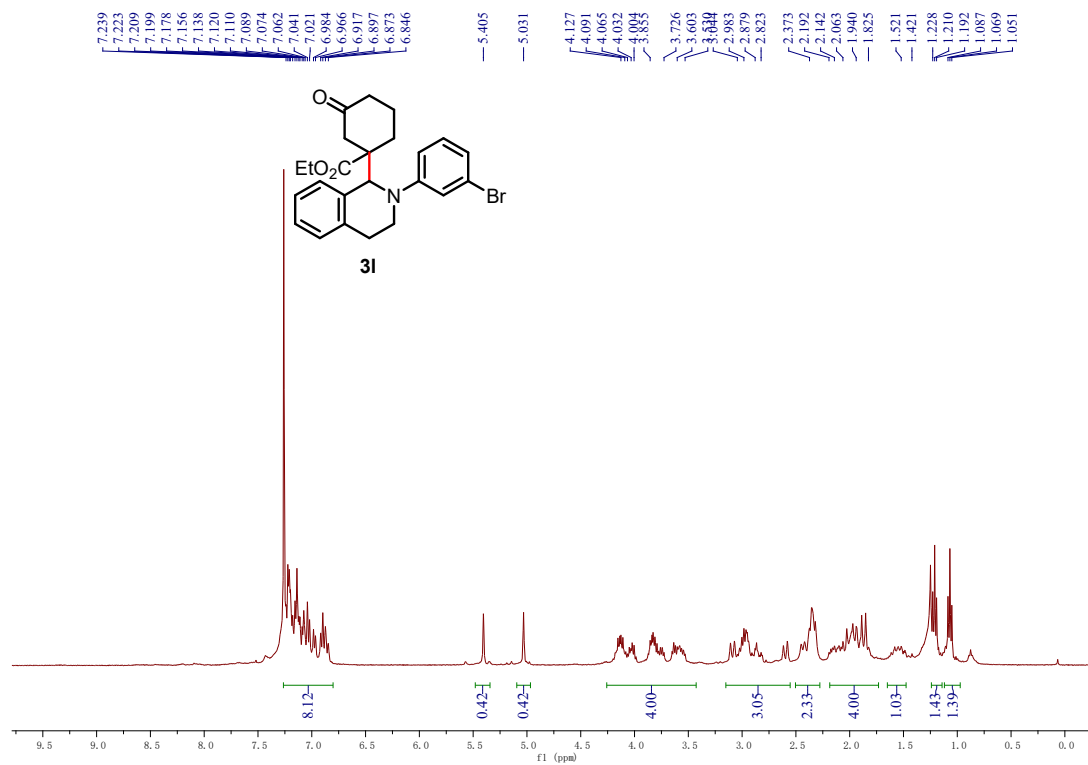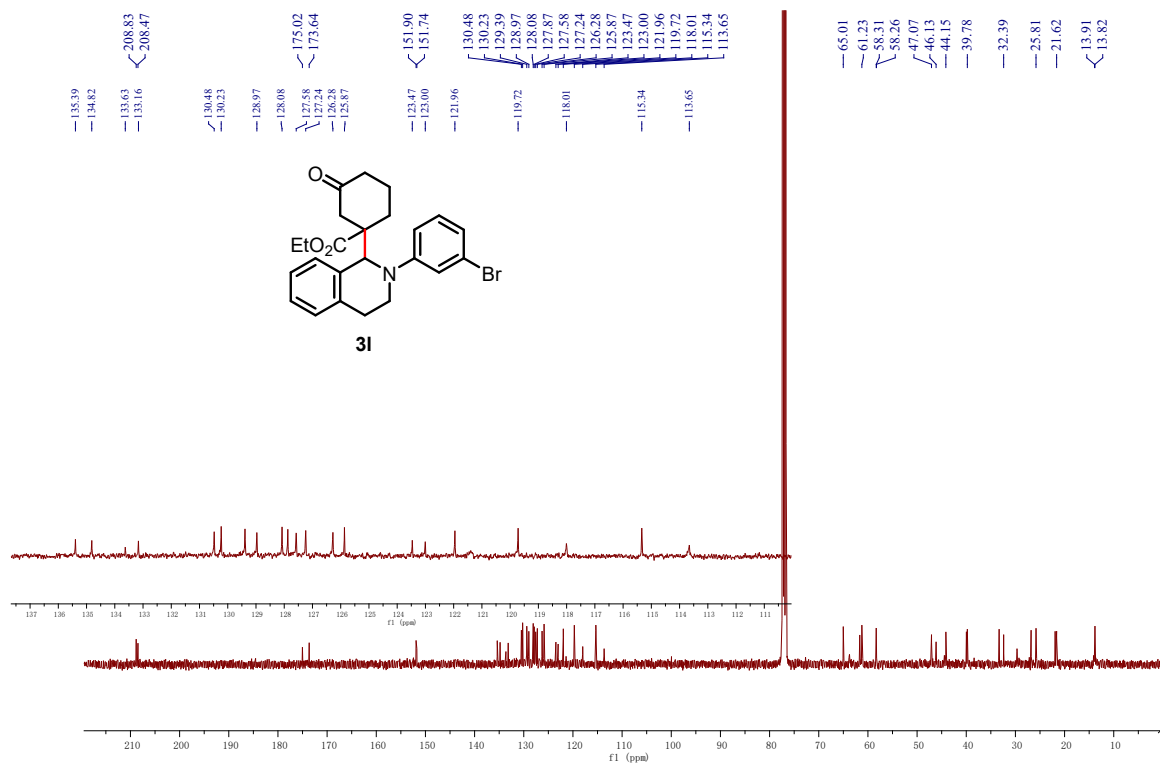

$^1\text{H}$  NMR (400 MHz,  $\text{CDCl}_3$ ) and  $^{13}\text{C}$  NMR (100 MHz,  $\text{CDCl}_3$ ) spectra of **3m**

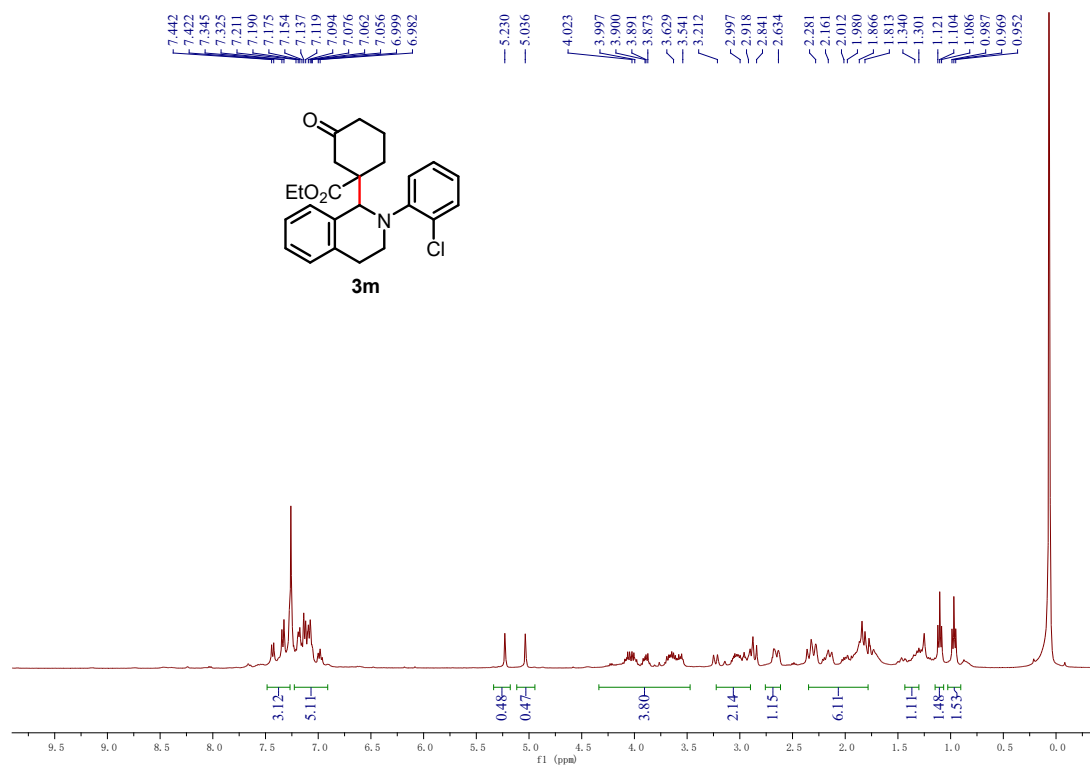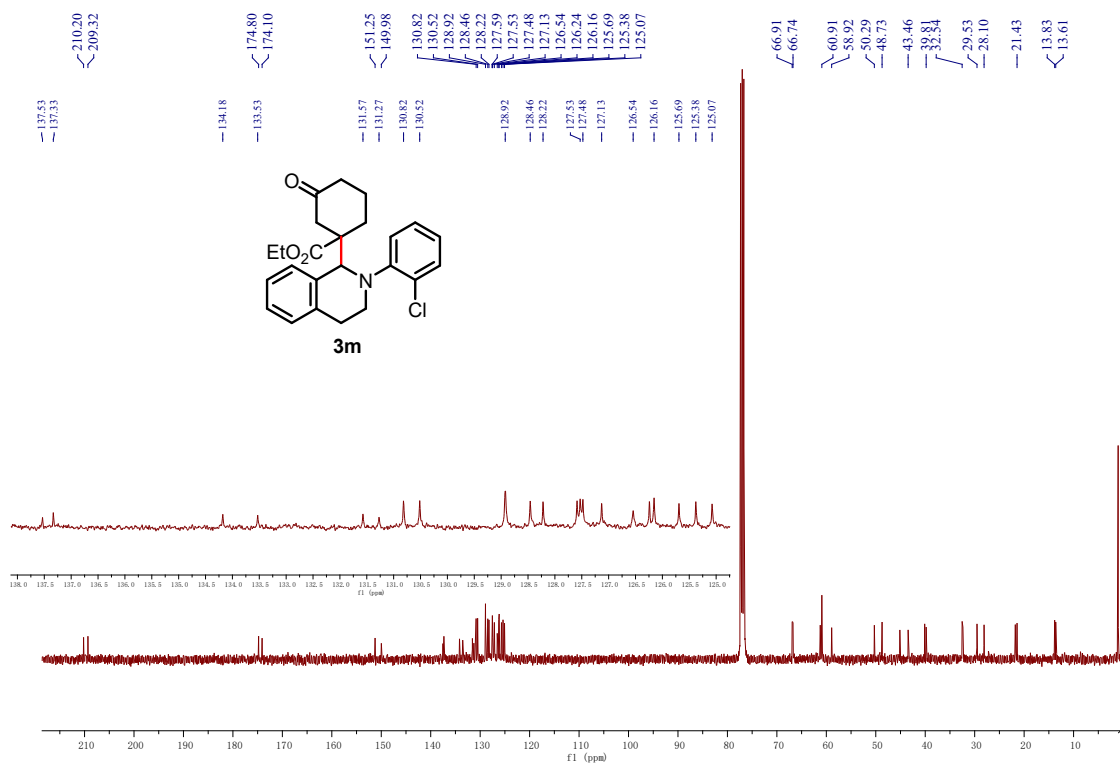

$^1\text{H}$  NMR (400 MHz,  $\text{CDCl}_3$ ) and  $^{13}\text{C}$  NMR (100 MHz,  $\text{CDCl}_3$ ) spectra of **3n**

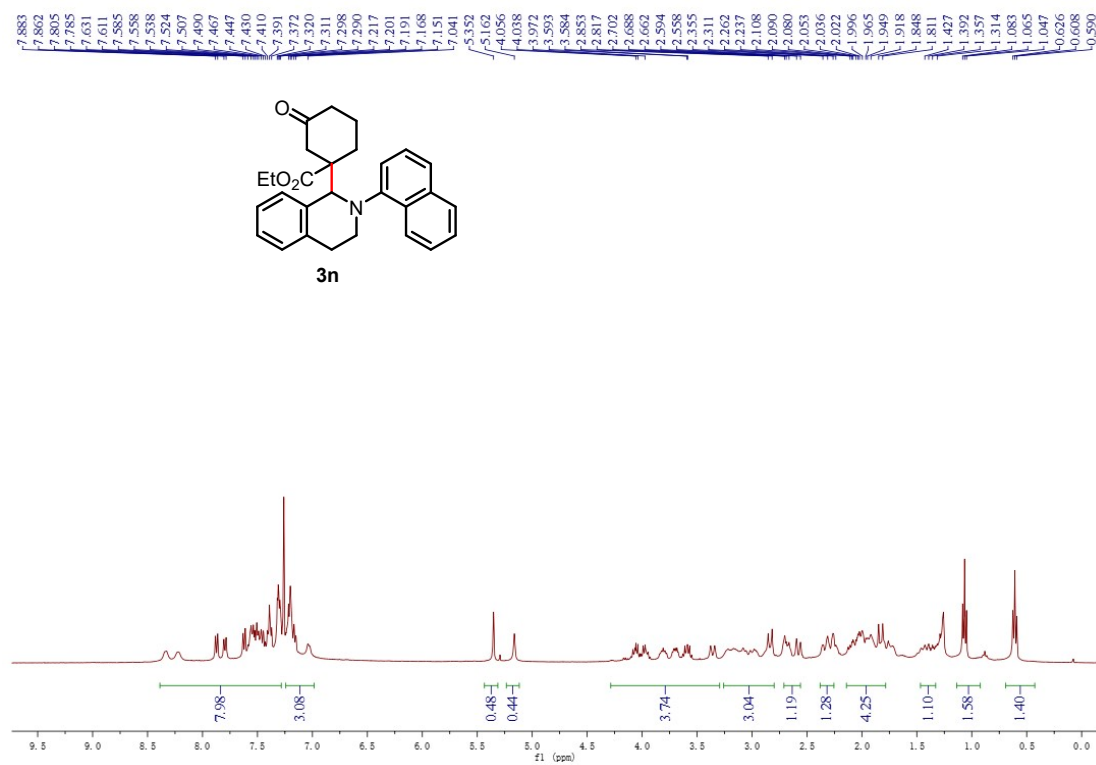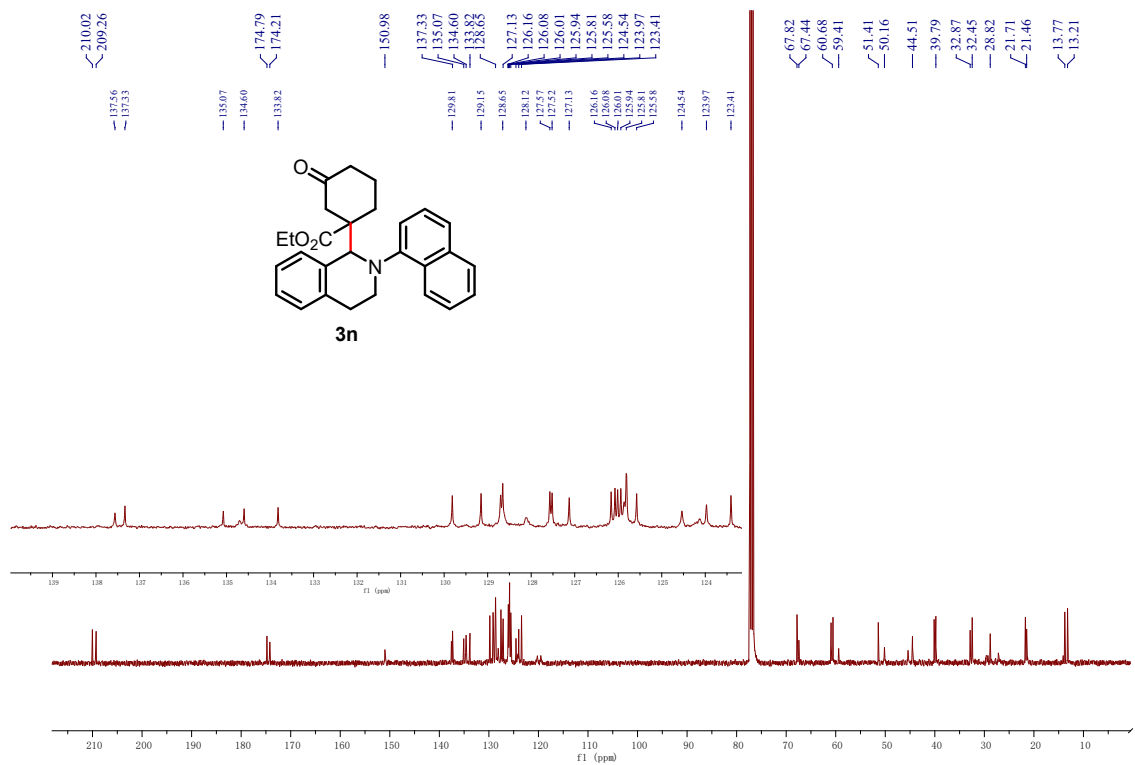



$^1\text{H}$  NMR (400 MHz,  $\text{CDCl}_3$ ) and  $^{13}\text{C}$  NMR (100 MHz,  $\text{CDCl}_3$ ) spectra of **3o**

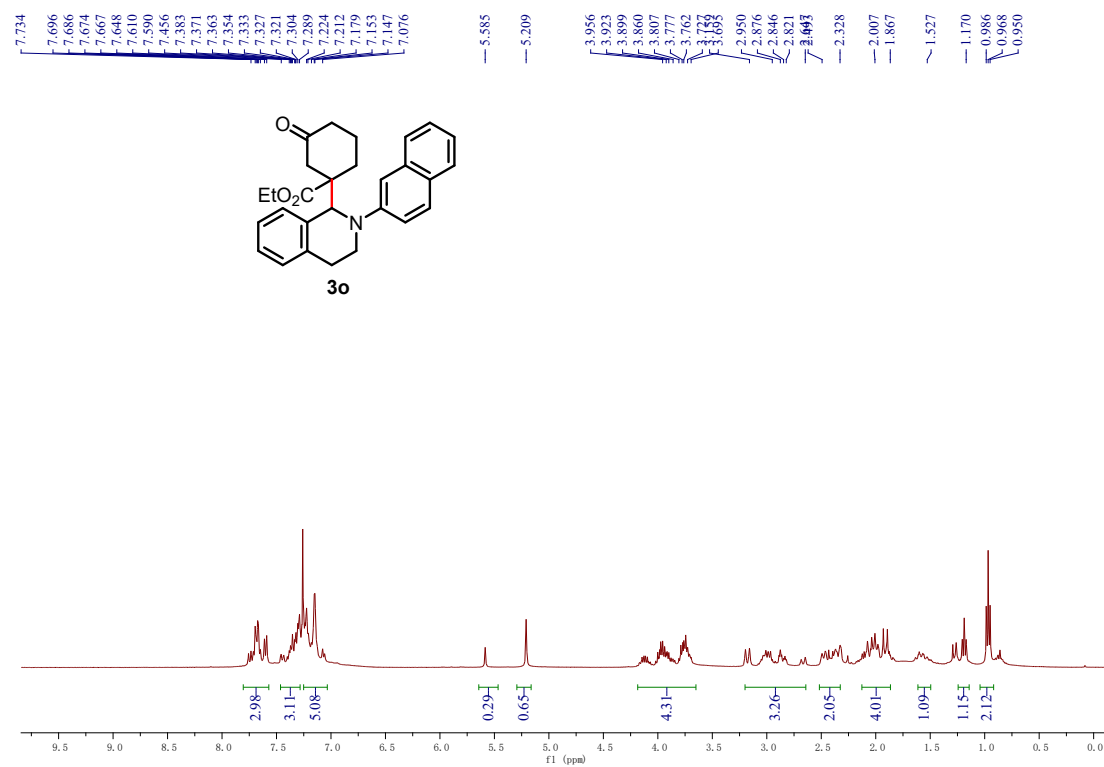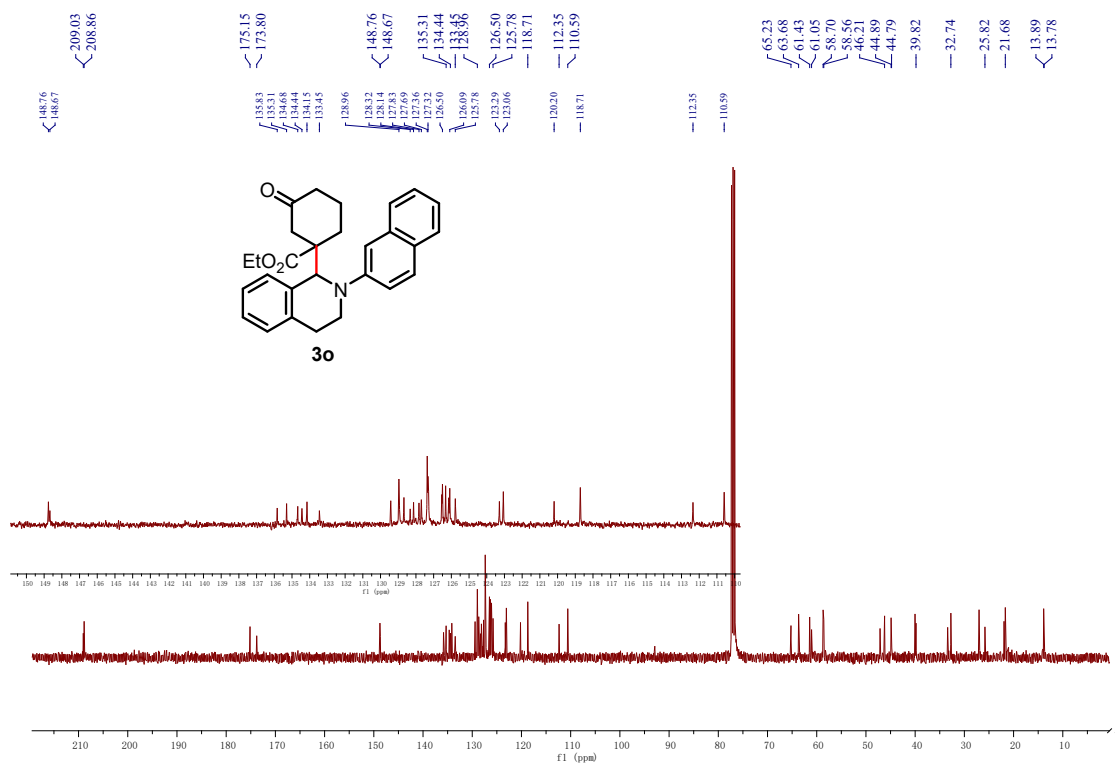

$^1\text{H}$  NMR (400 MHz,  $\text{CDCl}_3$ ) and  $^{13}\text{C}$  NMR (100 MHz,  $\text{CDCl}_3$ ) spectra of **3p**

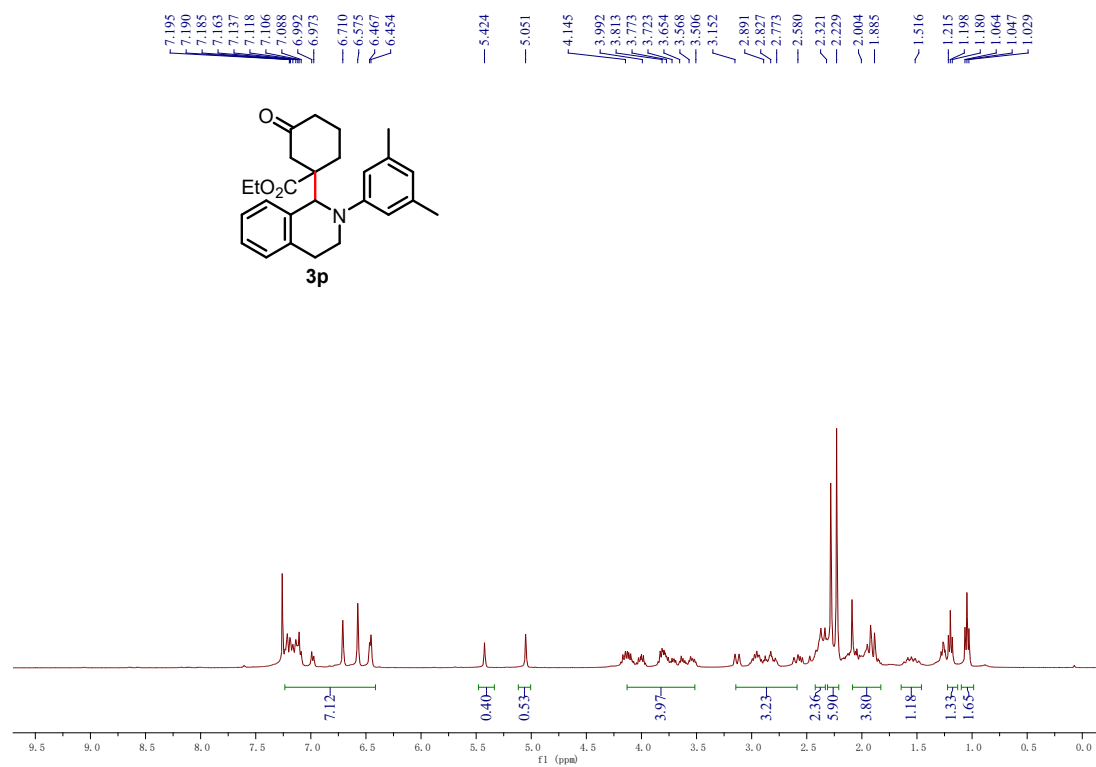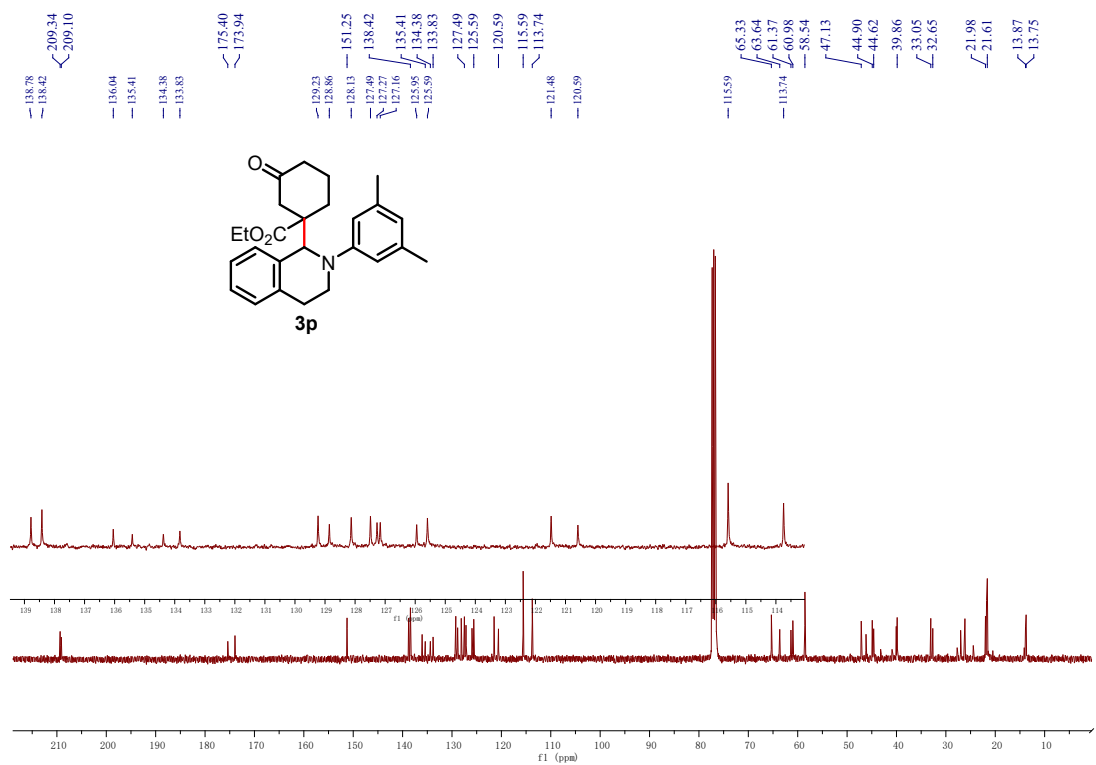

$^1\text{H}$  NMR (400 MHz,  $\text{CDCl}_3$ ) and  $^{13}\text{C}$  NMR (100 MHz,  $\text{CDCl}_3$ ) spectra of **3q**

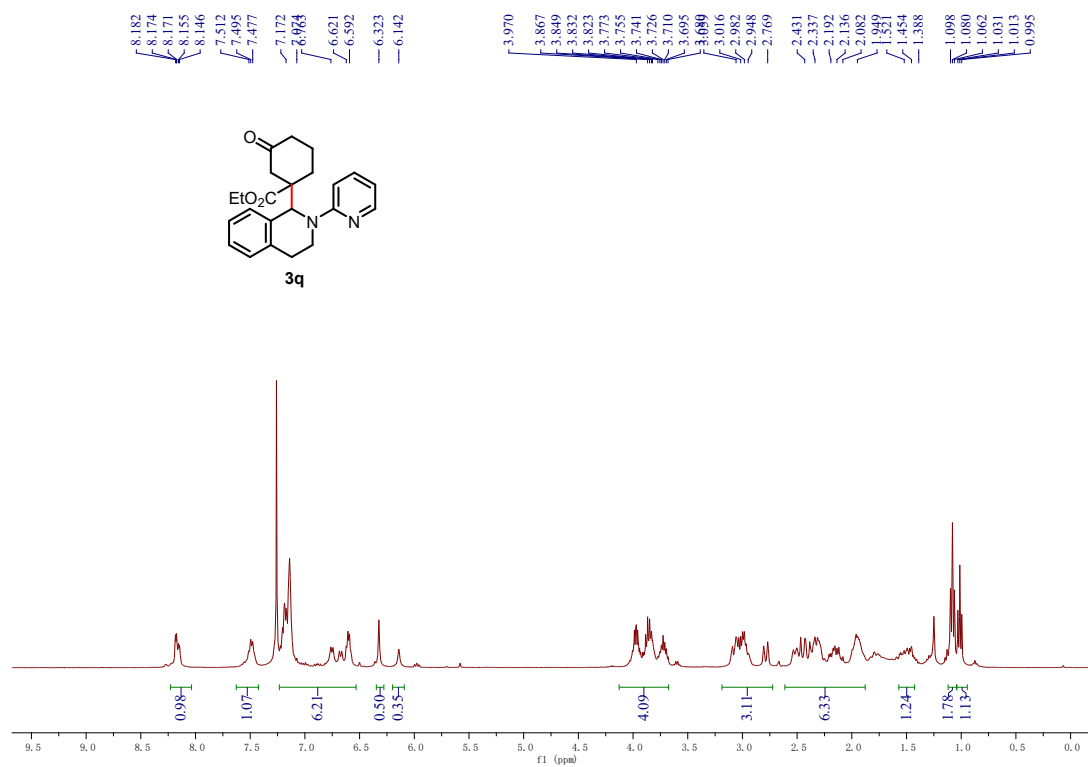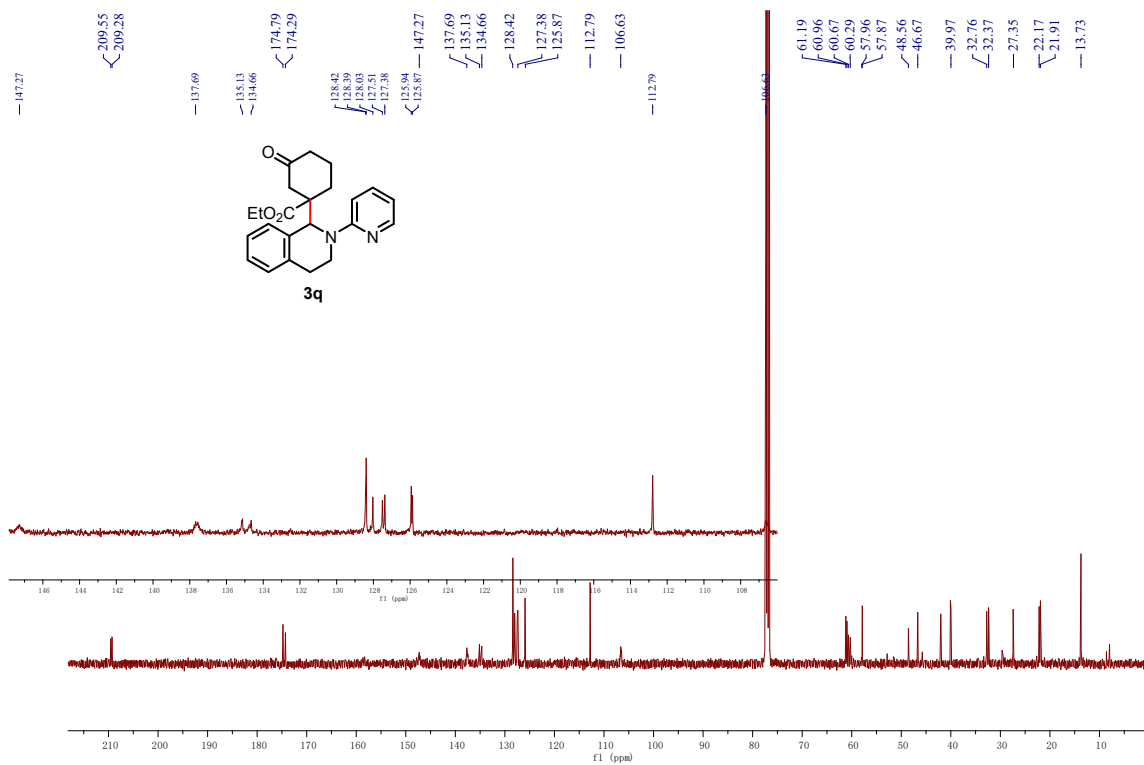

$^1\text{H}$  NMR (400 MHz,  $\text{CDCl}_3$ ) and  $^{13}\text{C}$  NMR (100 MHz,  $\text{CDCl}_3$ ) spectra of **3r**

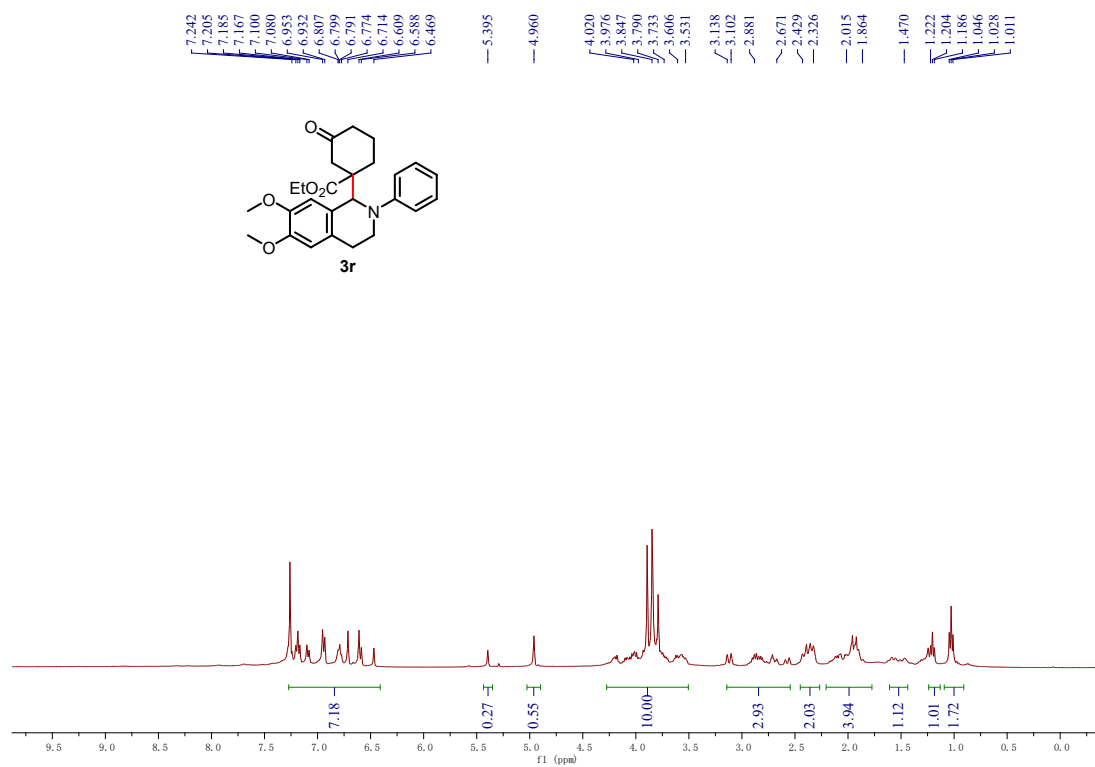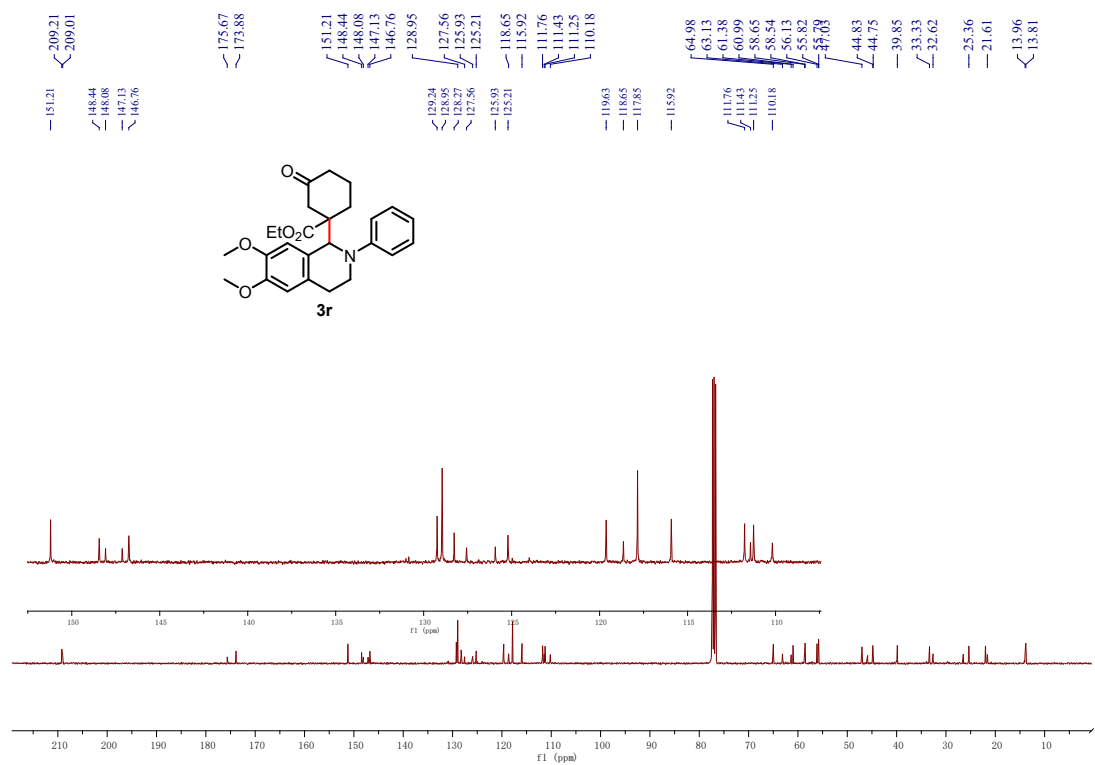

$^1\text{H}$  NMR (400 MHz,  $\text{CDCl}_3$ ) and  $^{13}\text{C}$  NMR (100 MHz,  $\text{CDCl}_3$ ) spectra of **3s**

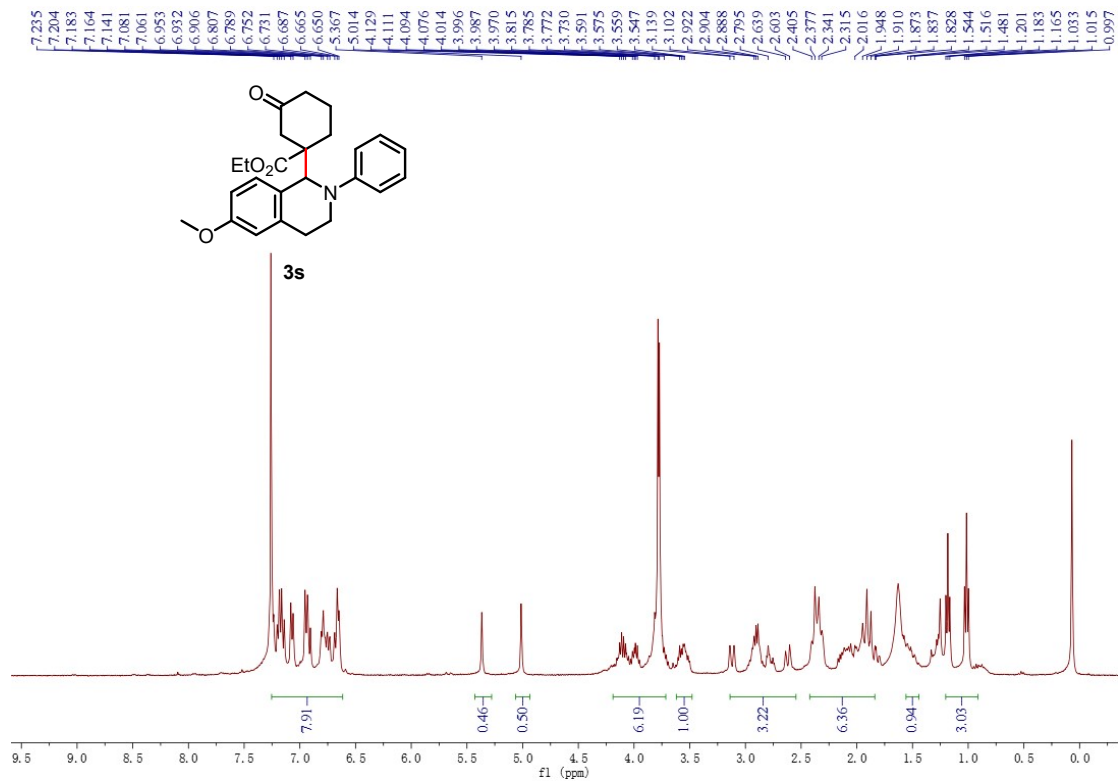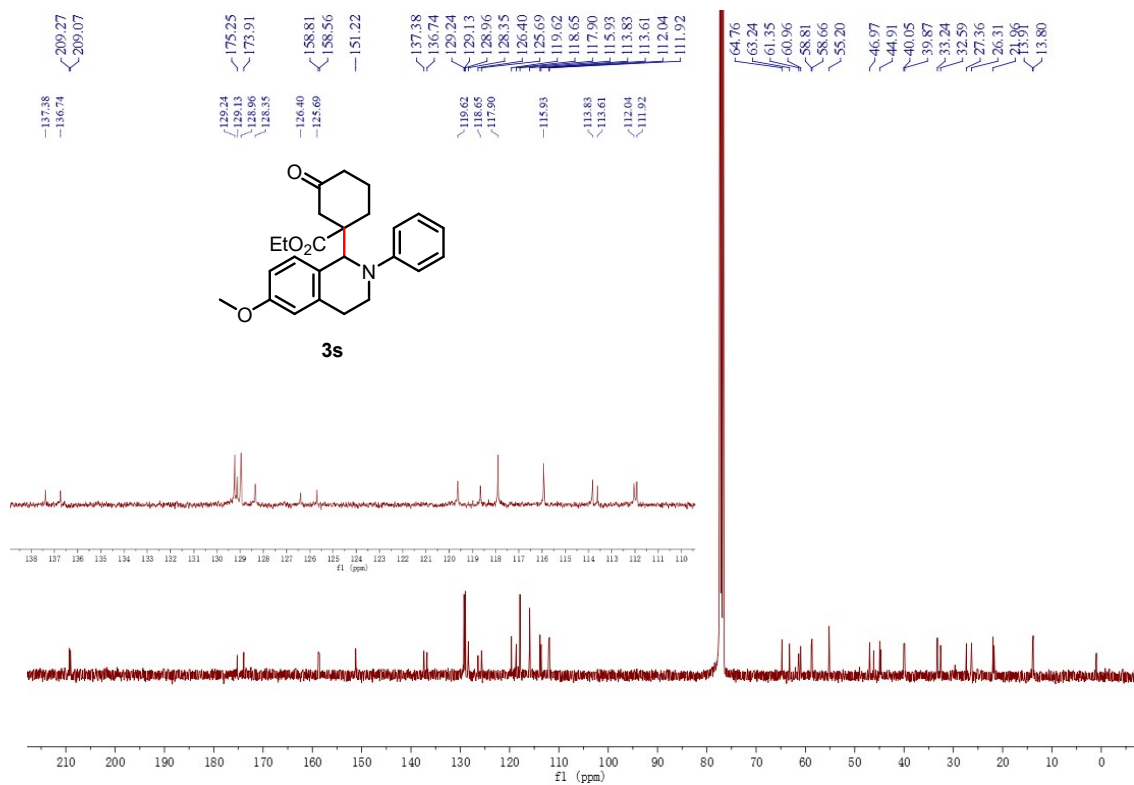

$^1\text{H}$  NMR (400 MHz,  $\text{CDCl}_3$ ) and  $^{13}\text{C}$  NMR (100 MHz,  $\text{CDCl}_3$ ) spectra of **3t**

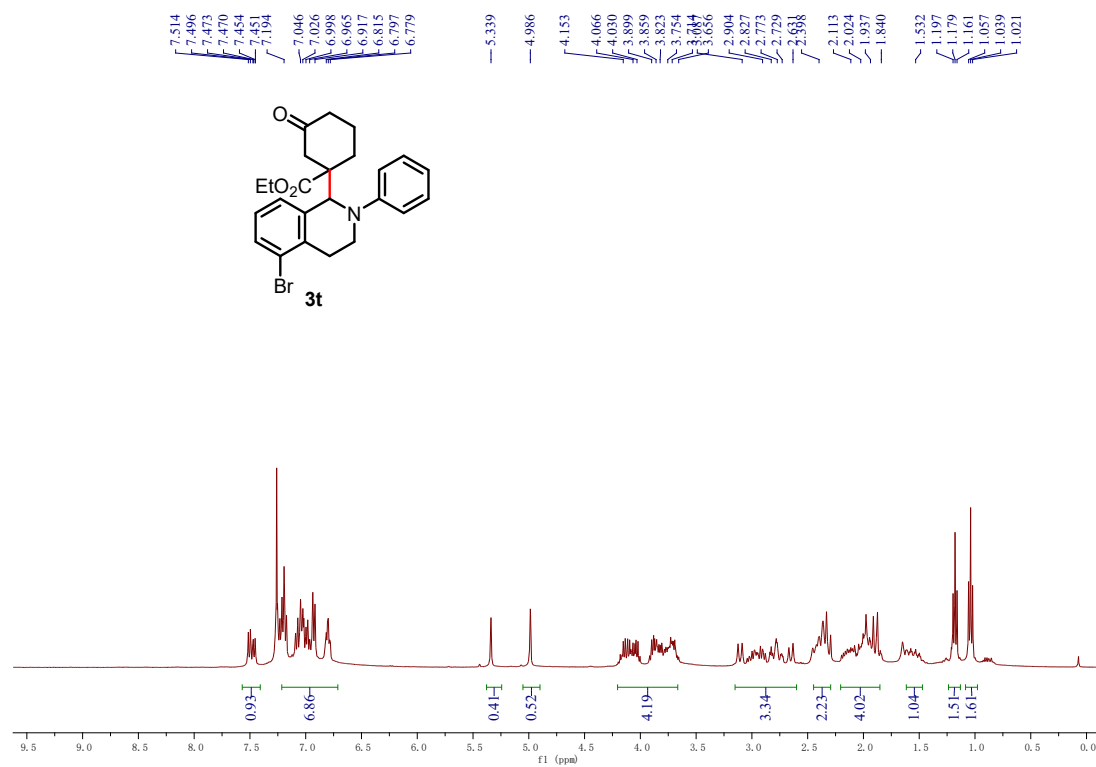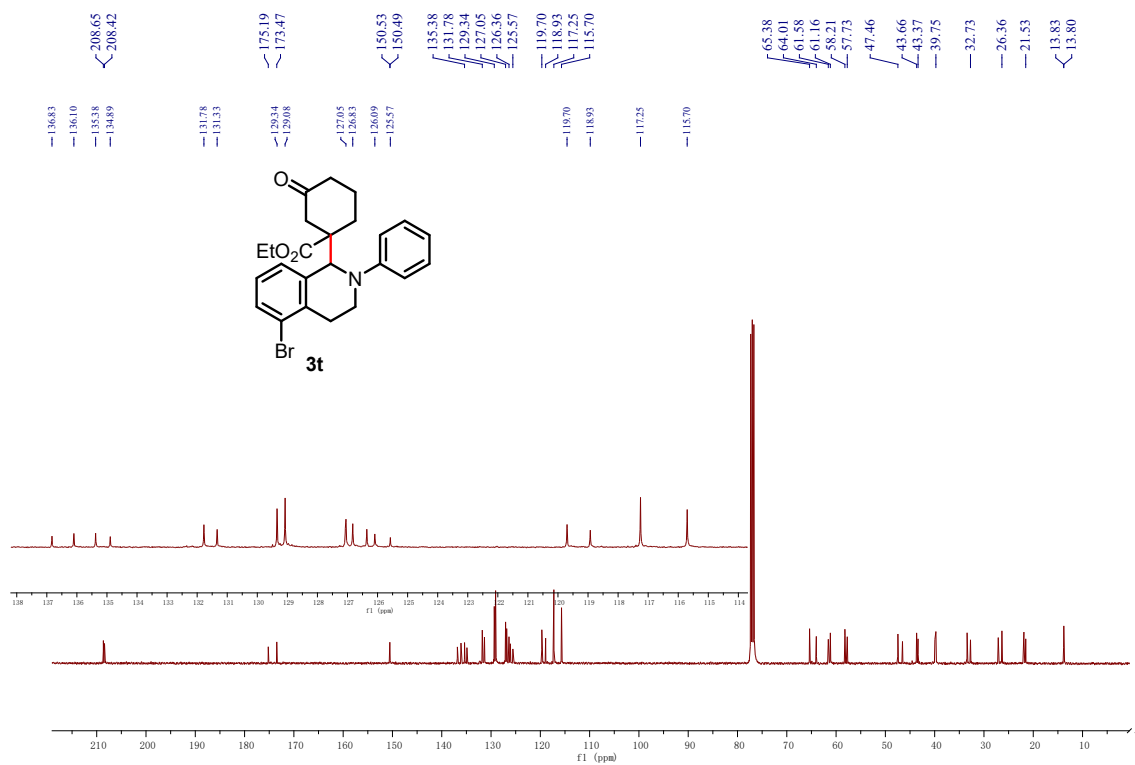

$^1\text{H}$  NMR (400 MHz,  $\text{CDCl}_3$ ) and  $^{13}\text{C}$  NMR (100 MHz,  $\text{CDCl}_3$ ) spectra of **3u**

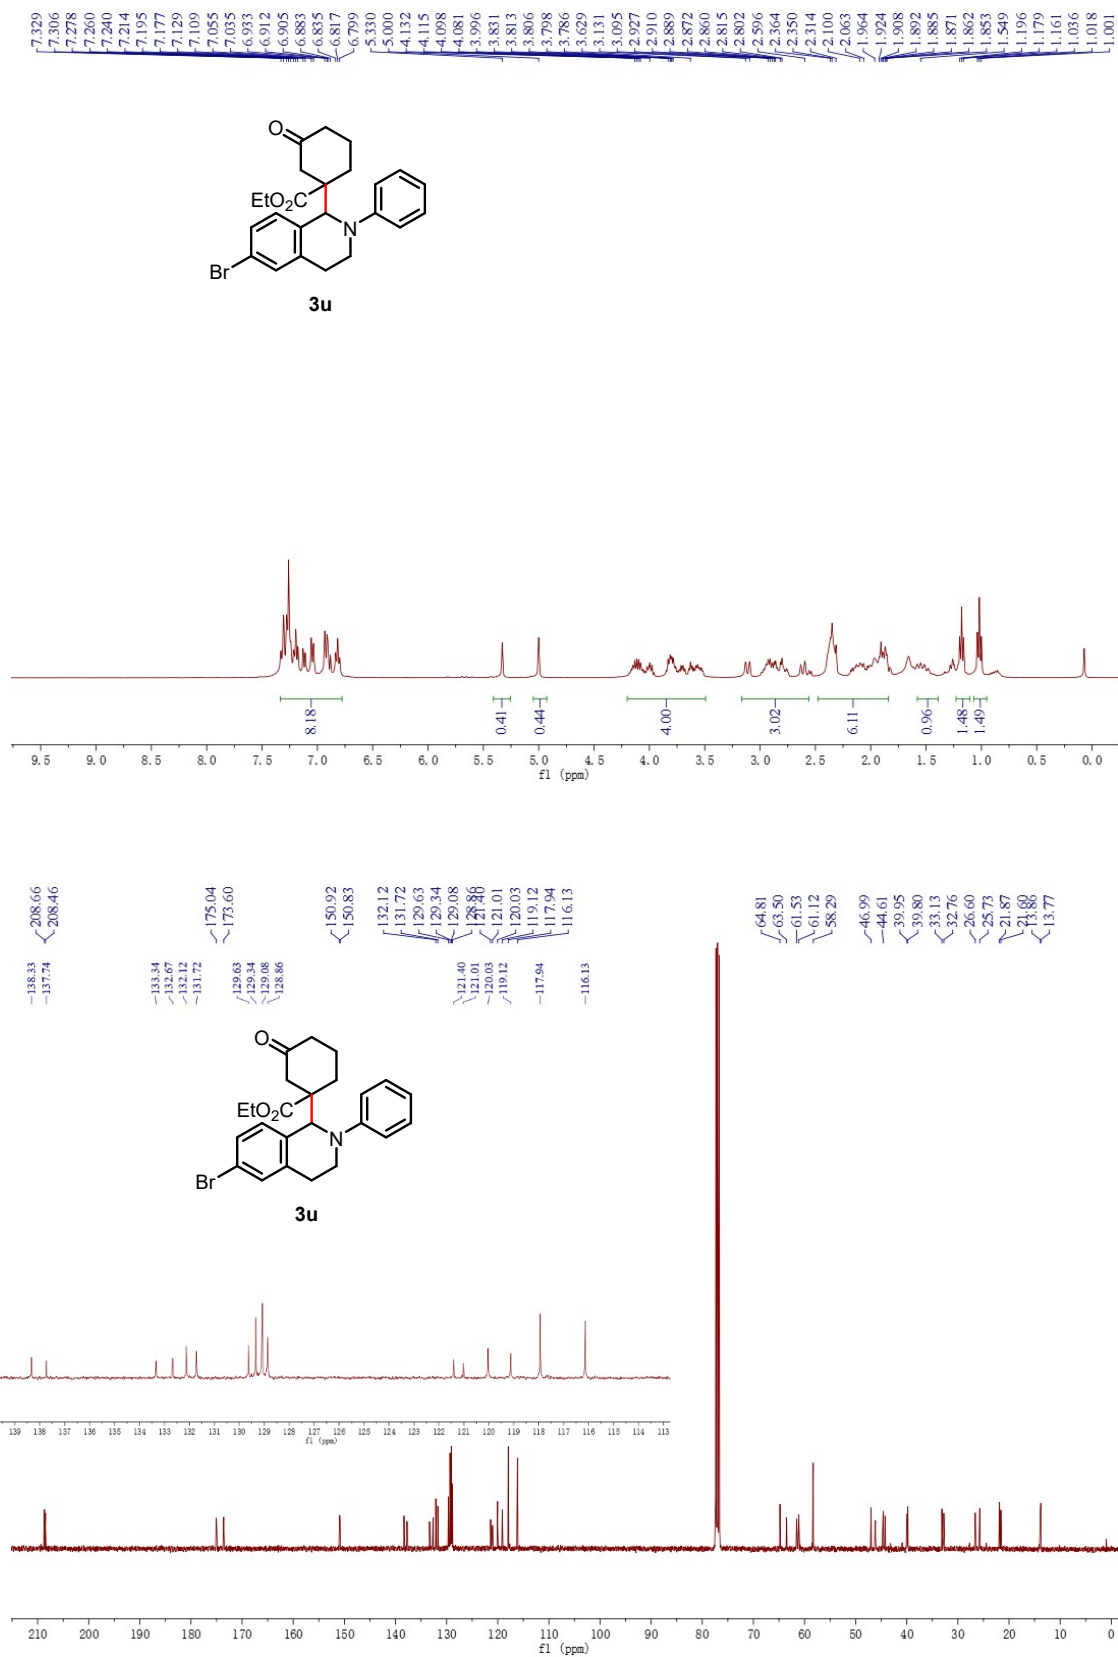

$^1\text{H}$  NMR (400 MHz,  $\text{CDCl}_3$ ) and  $^{13}\text{C}$  NMR (100 MHz,  $\text{CDCl}_3$ ) spectra of **4a**

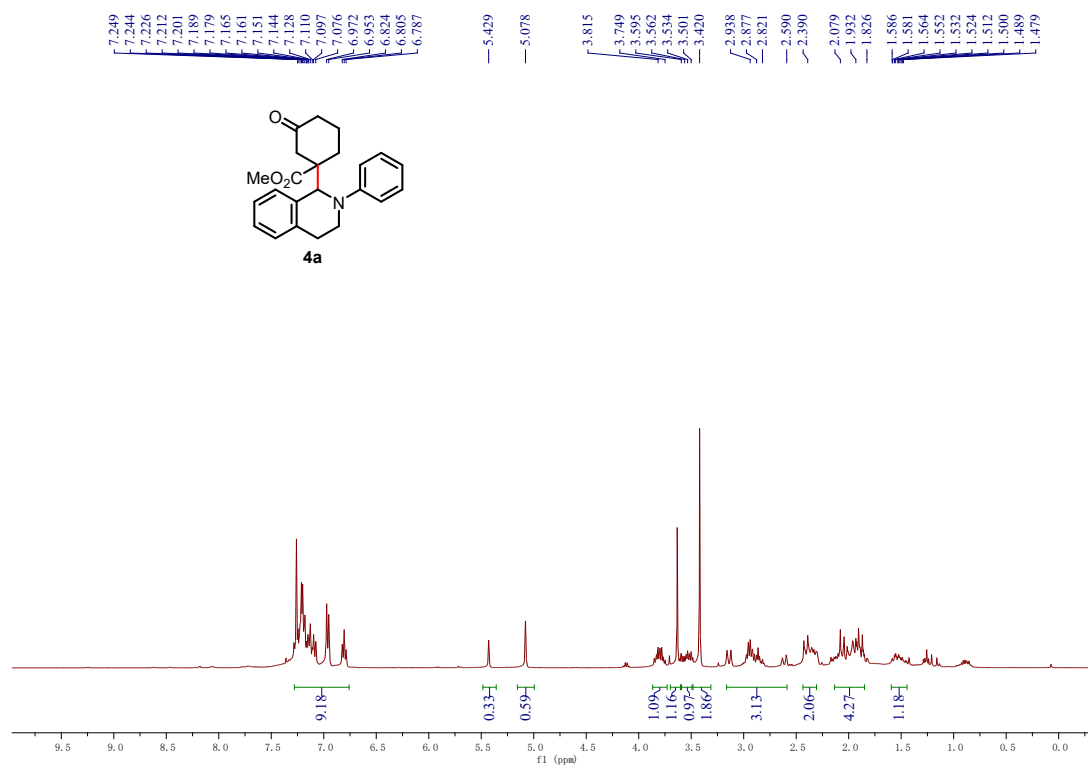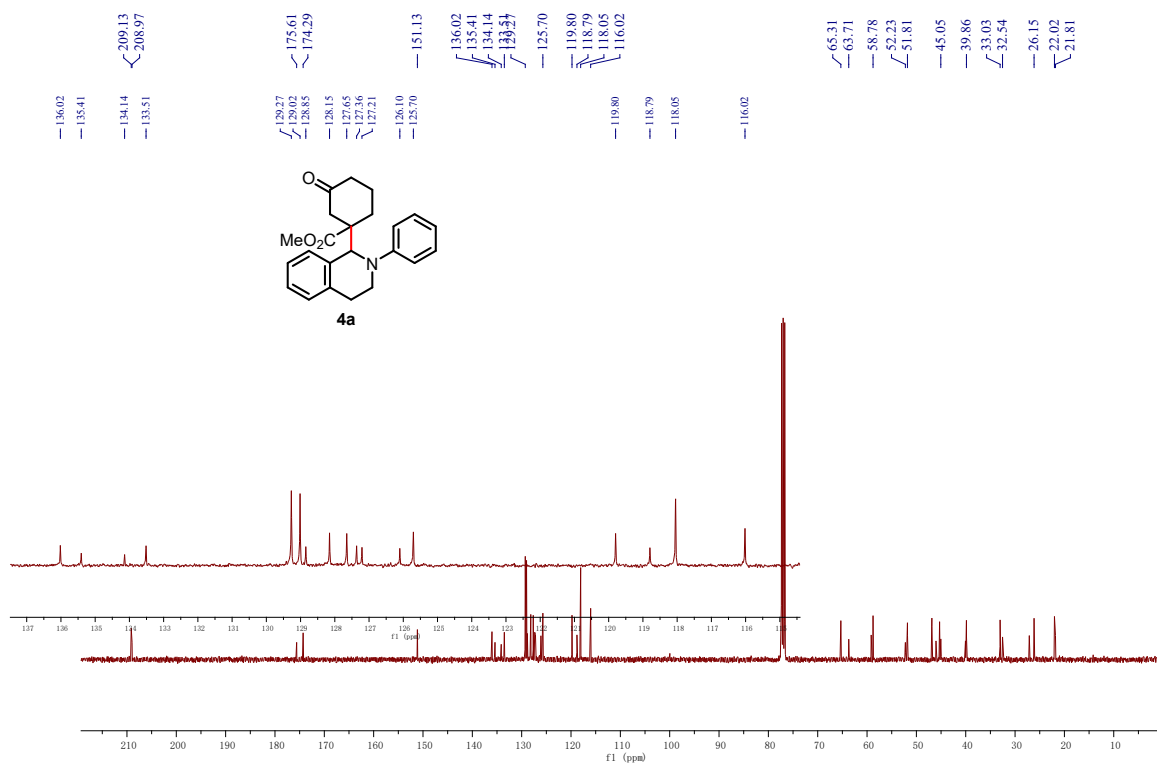



$^1\text{H}$  NMR (400 MHz,  $\text{CDCl}_3$ ) and  $^{13}\text{C}$  NMR (100 MHz,  $\text{CDCl}_3$ ) spectra of **4b**

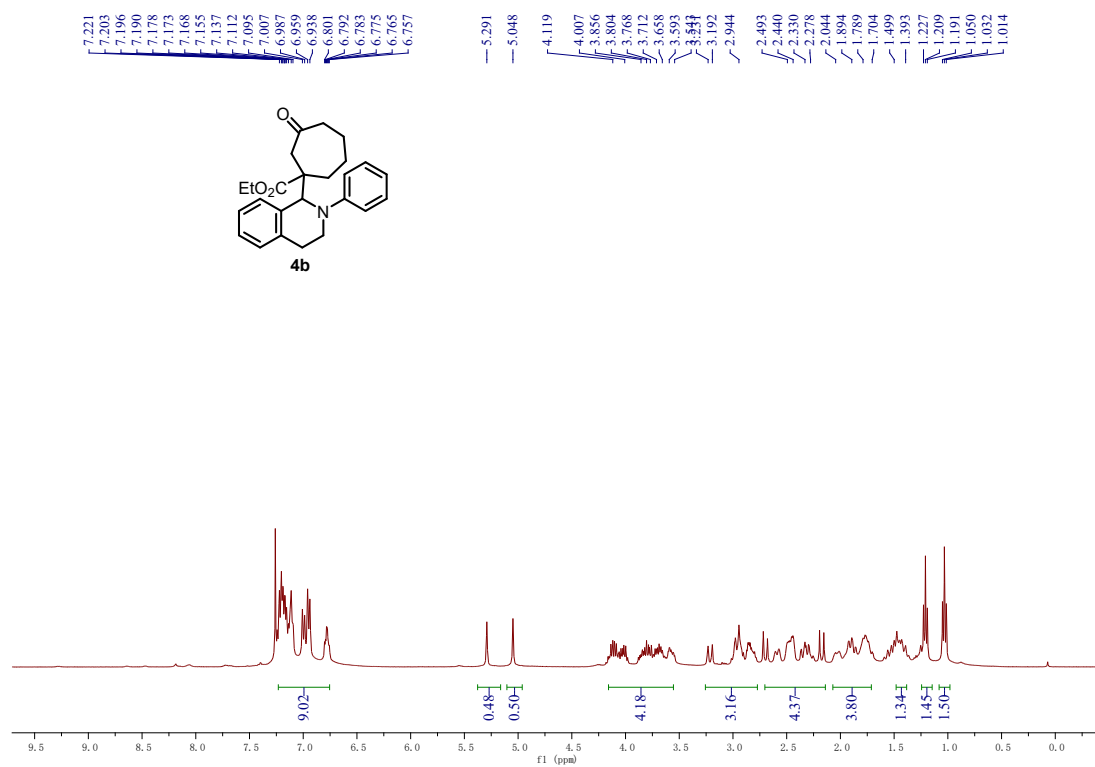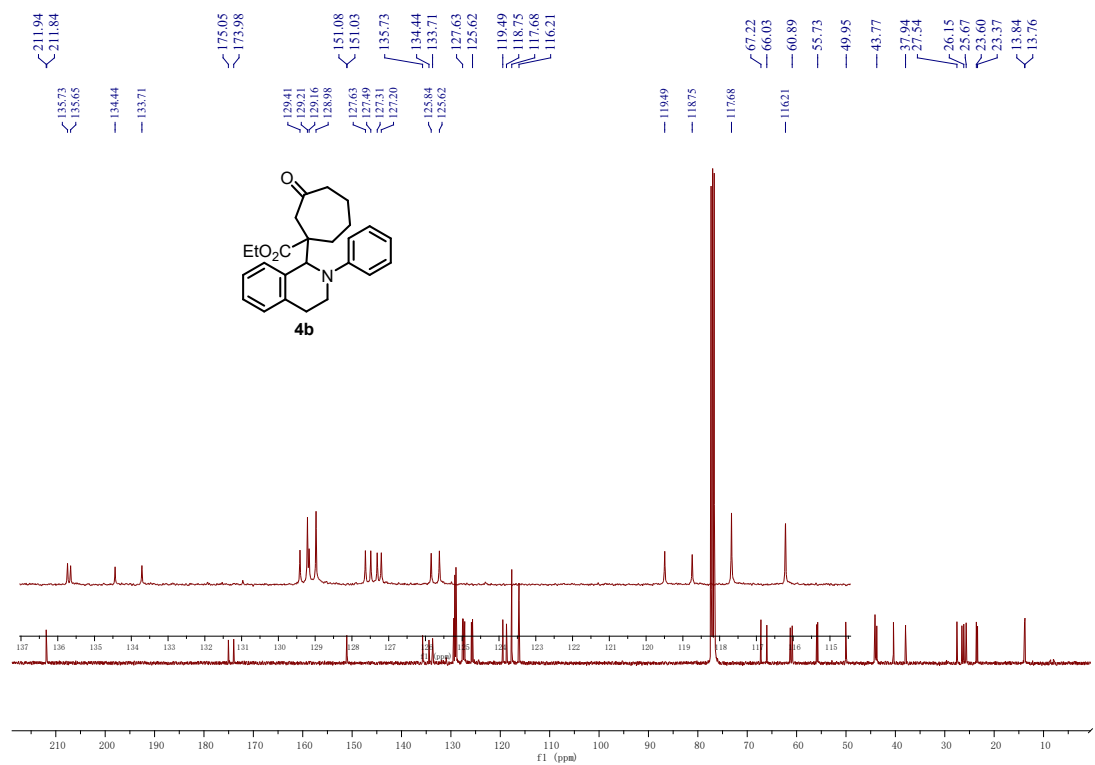

$^1\text{H}$  NMR (400 MHz,  $\text{CDCl}_3$ ) and  $^{13}\text{C}$  NMR (100 MHz,  $\text{CDCl}_3$ ) spectra of **4c**

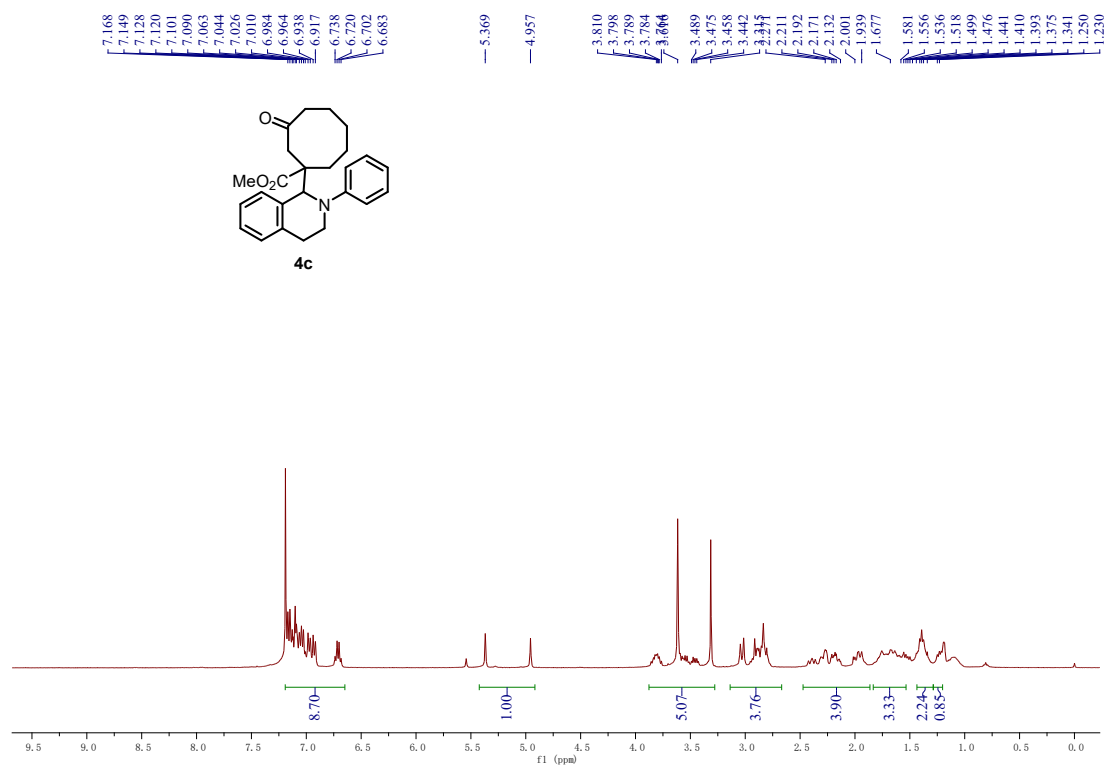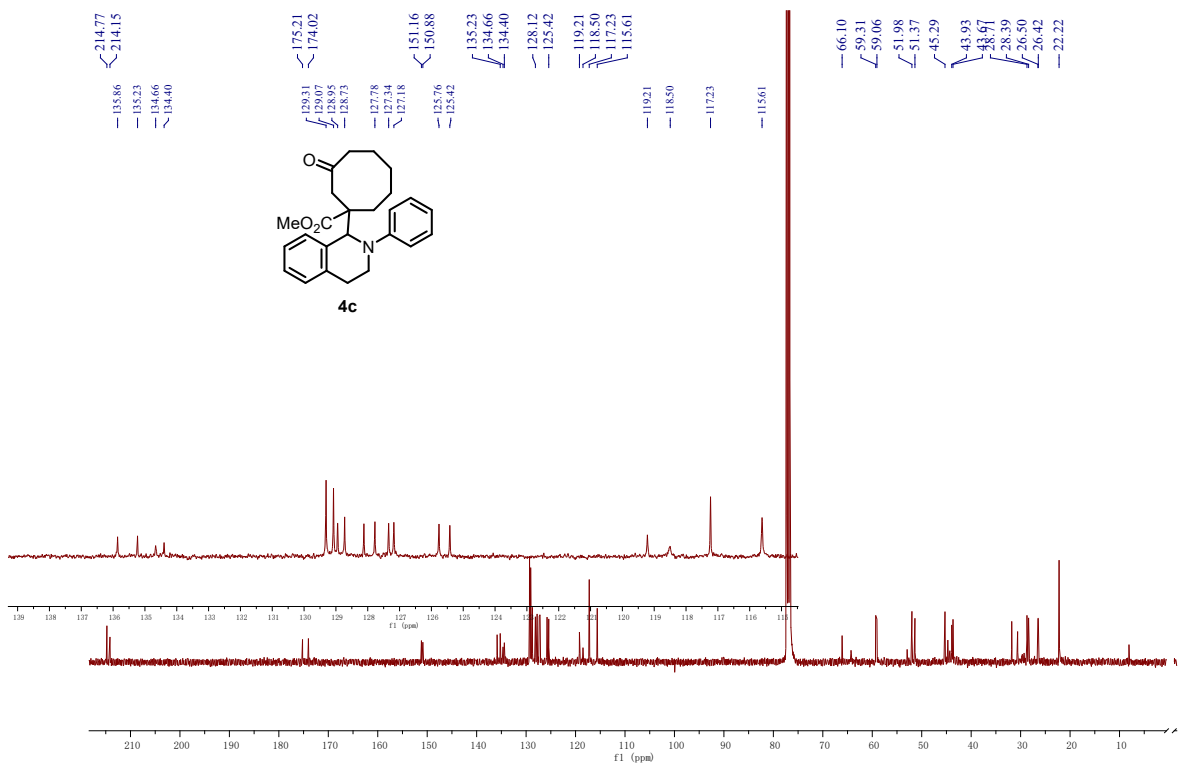

$^1\text{H}$  NMR (400 MHz,  $\text{CDCl}_3$ ) and  $^{13}\text{C}$  NMR (100 MHz,  $\text{CDCl}_3$ ) spectra of **4d**

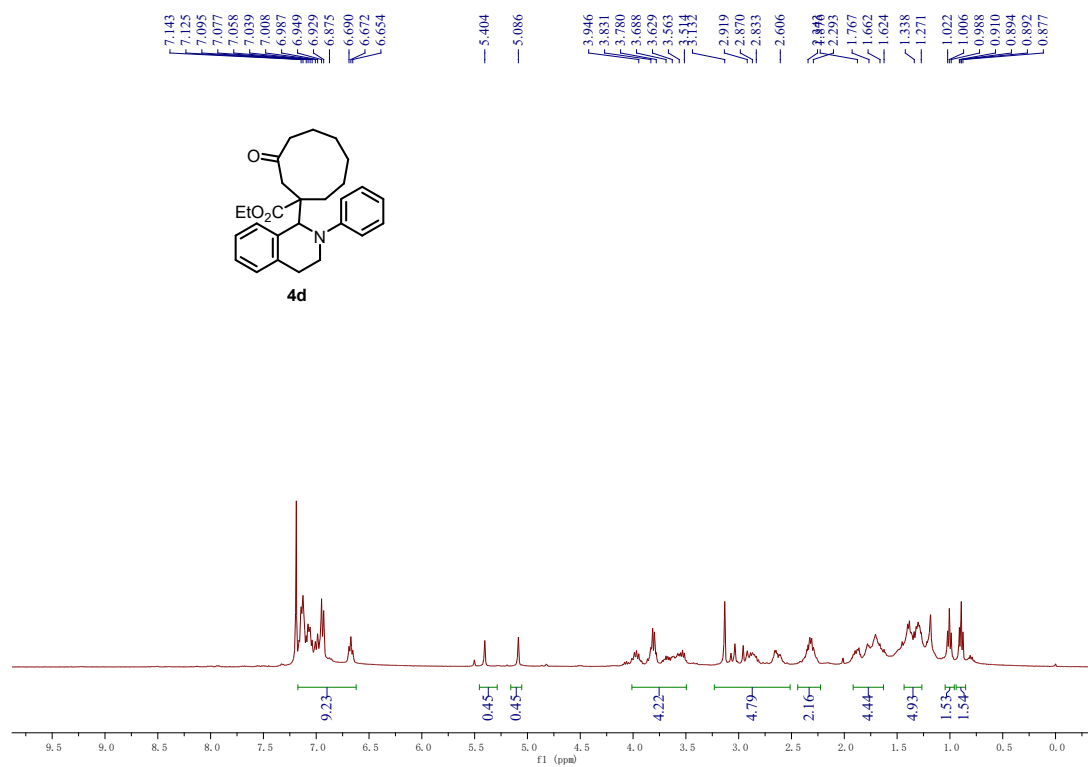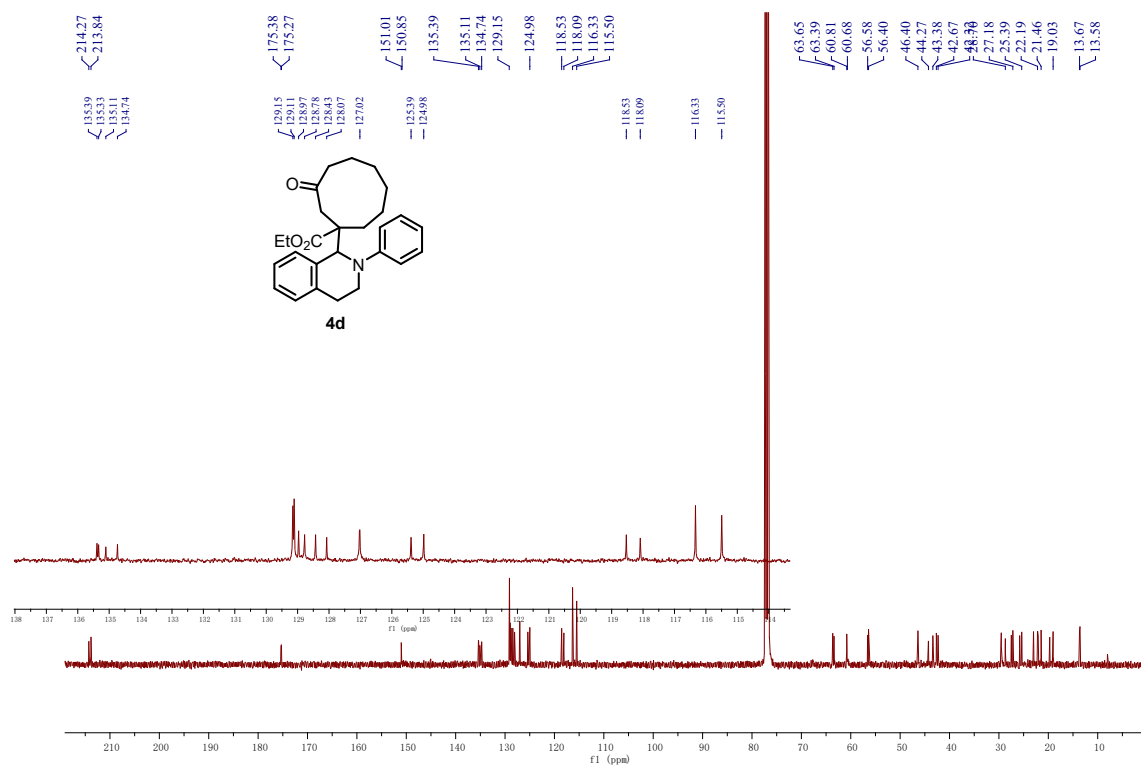

$^1\text{H}$  NMR (400 MHz,  $\text{CDCl}_3$ ) and  $^{13}\text{C}$  NMR (100 MHz,  $\text{CDCl}_3$ ) spectra of **4e**

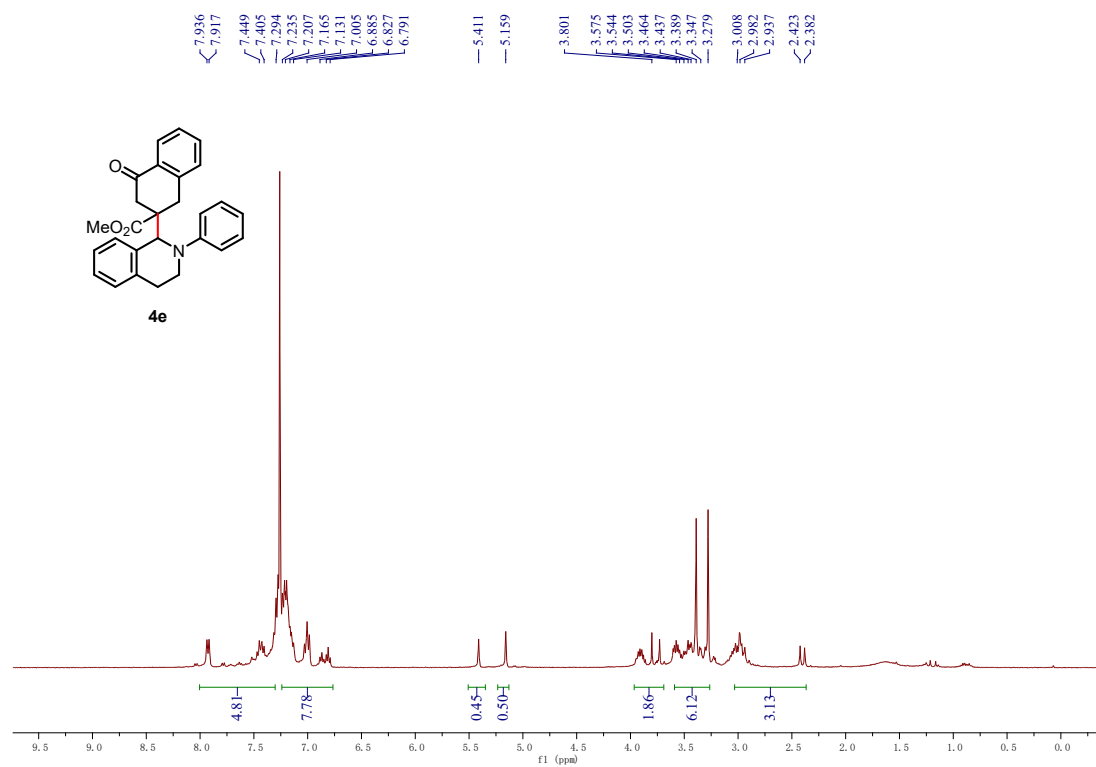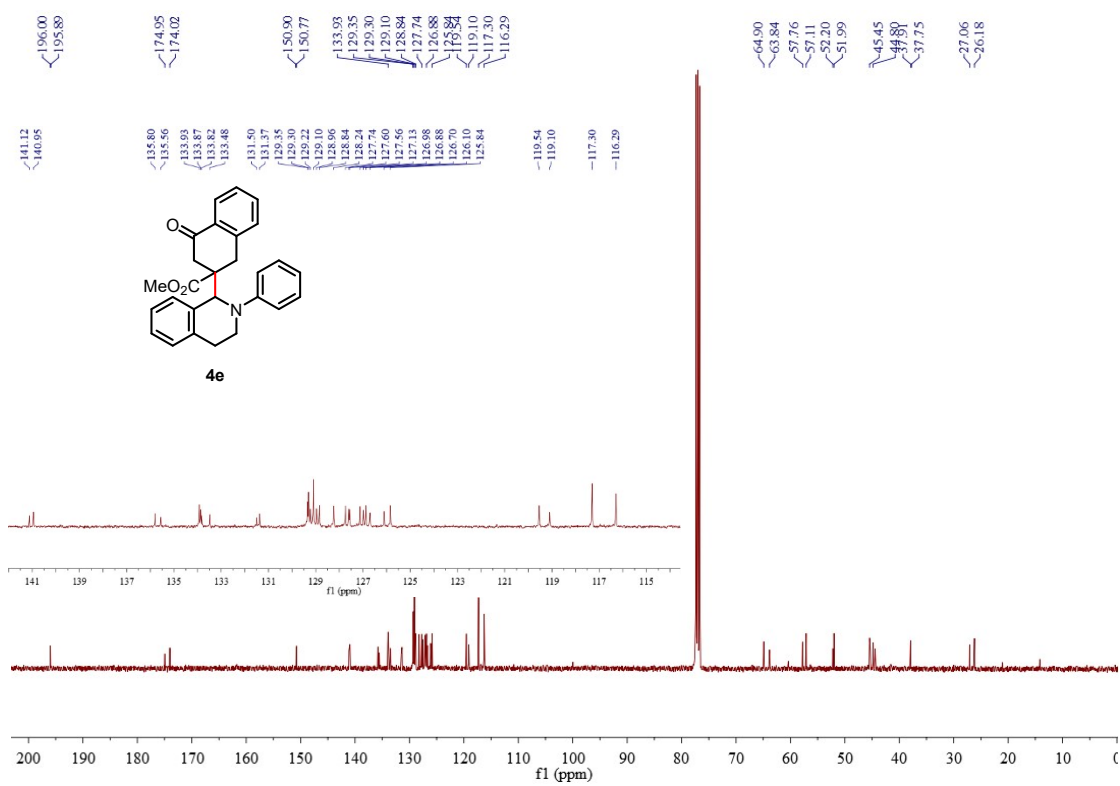

$^1\text{H}$  NMR (400 MHz,  $\text{CDCl}_3$ ) and  $^{13}\text{C}$  NMR (100 MHz,  $\text{CDCl}_3$ ) spectra of **4f**

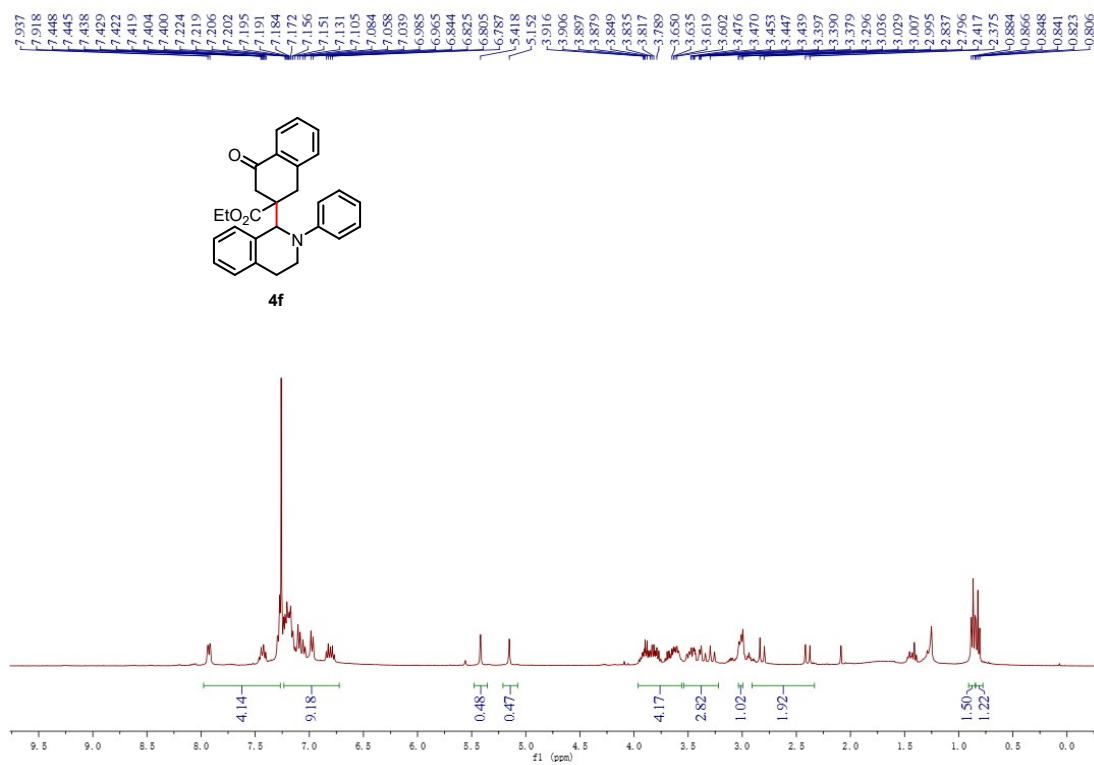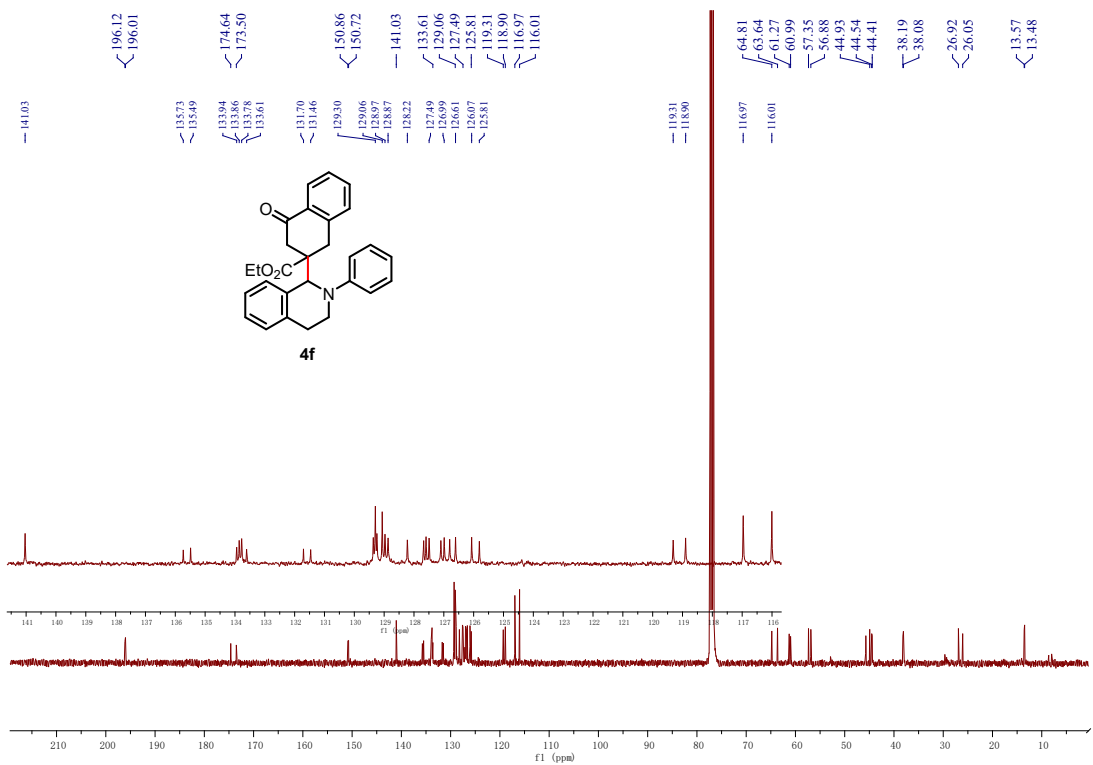



$^1\text{H}$  NMR (400 MHz,  $\text{CDCl}_3$ ) and  $^{13}\text{C}$  NMR (100 MHz,  $\text{CDCl}_3$ ) spectra of **4h**

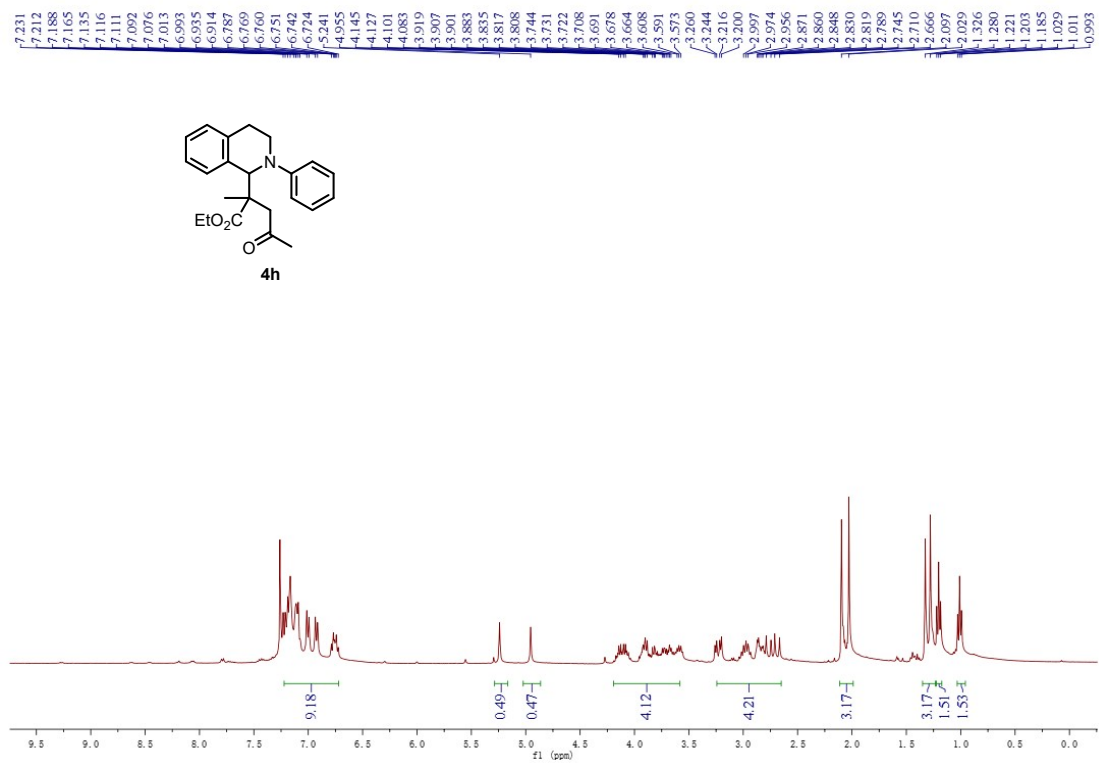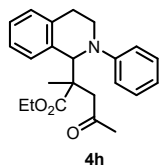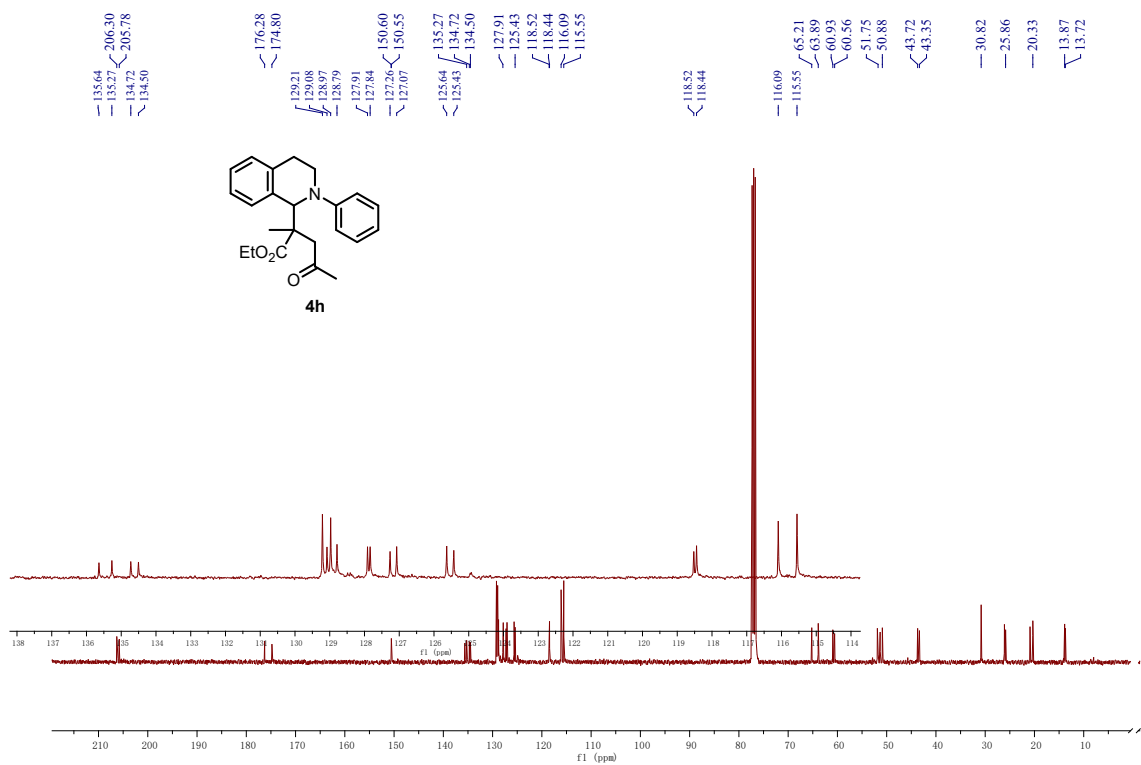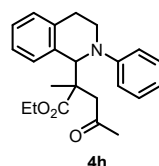

2D-COSY experiment of **3a** (400 MHz, CDCl<sub>3</sub>)

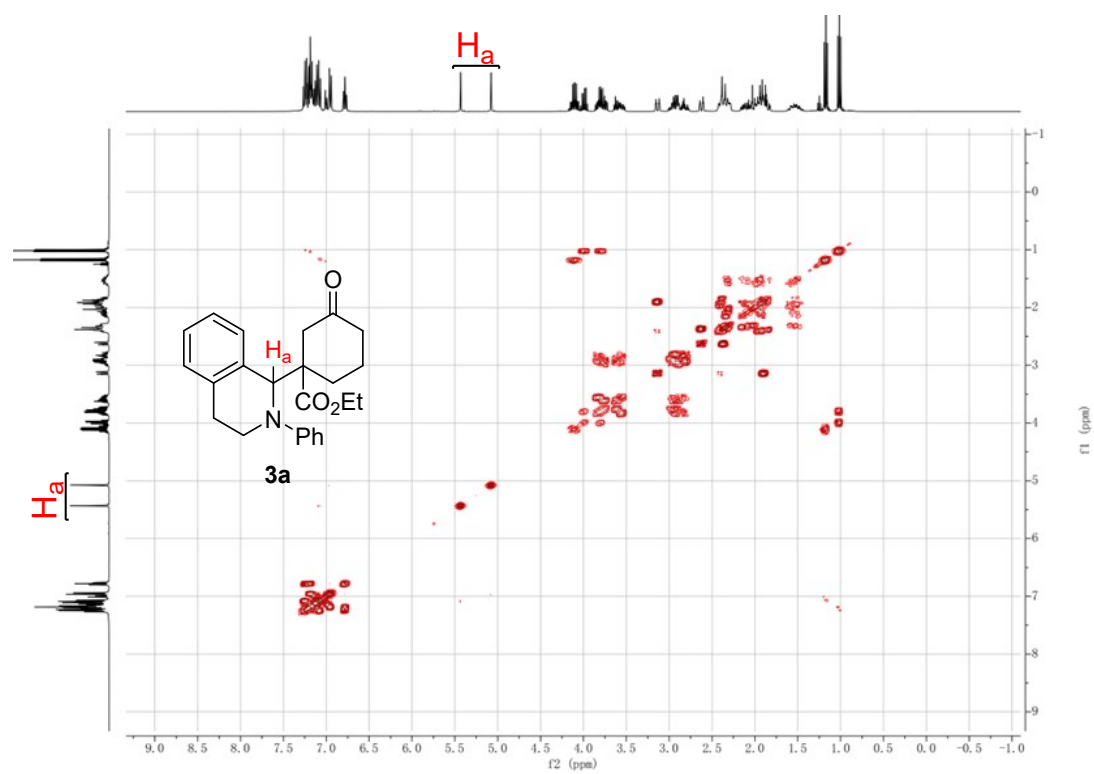



$^{19}\text{F}$  NMR (376 MHz,  $\text{CDCl}_3$ ) spectra of **3f**

-124.739  
-126.319

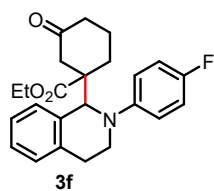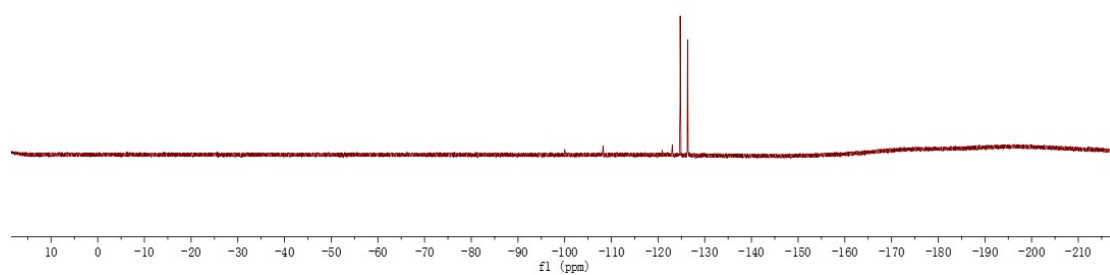

$^{19}\text{F}$  NMR (376 MHz,  $\text{CDCl}_3$ ) spectra of **3j**

-111.851  
-112.377

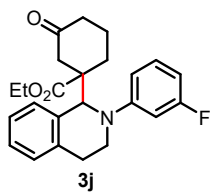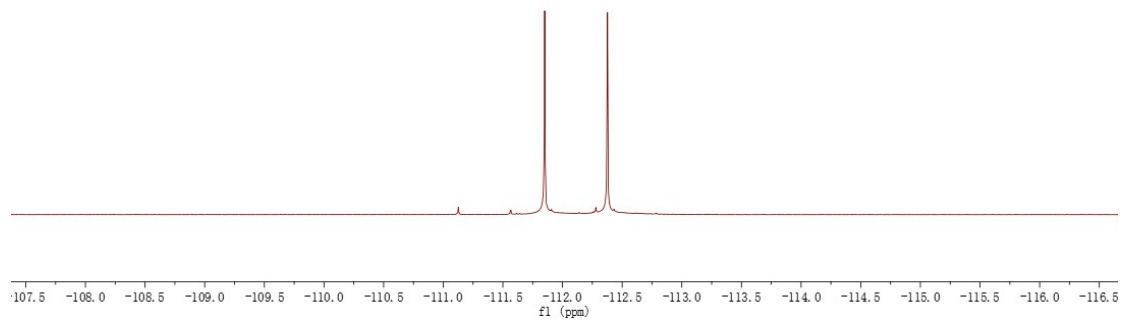

Supplement: d2qo02001g1.pdf [file d2qo02001g1.pdf]
